# Supplementary material for: Iridium-catalysed reductive allylic amination of α,β-unsaturated aldehydes
Source: Royal Society of Chemistry journal article supplement (doi:10.1039/d3ob01753b), 2023-12-12
Supplement: d3ob01753b1.pdf [file d3ob01753b1.pdf]

# Iridium-Catalysed **Reductive** Allylic Amination of $\alpha$ , $\beta$ -Unsaturated Aldehydes

Liang Liu,<sup>a</sup> Renshi Luo\*,<sup>b</sup> Jinghui Tong,<sup>a</sup> Jianhua Liao\*,<sup>a</sup>

<sup>a</sup> School of Pharmaceutical Sciences, Gannan Medical University, Ganzhou 341000, Jiangxi  
Province, P. R. China. Corresponding author: [liaojianhua@gmu.edu.cn](mailto:liaojianhua@gmu.edu.cn)

<sup>b</sup> College of Chemistry and Environmental Engineering, Shaoguan University, Shaoguan  
512005, P. R. China. Corresponding author: [luorenschi@sgu.edu.cn](mailto:luorenschi@sgu.edu.cn)

## Supporting Information

### Table of Contents

|                                                   |            |
|---------------------------------------------------|------------|
| A. General Methods .....                          | S2         |
| B. Procedure for the Preparation of 3 and 5 ..... | S2         |
| C. Analysis Data for the Products .....           | S2         |
| <b>D. References .....</b>                        | <b>S12</b> |
| E. NMR Spectra .....                              | S13        |
| F. HPLC Spectra .....                             | S57        |
| <b>G. HRMS Spectra .....</b>                      | <b>S61</b> |

## A. General Methods

$^1\text{H}$  and  $^{13}\text{C}$  NMR spectra were recorded by using a Bruker AVANCE-NEO 400M Hz spectrometer ( $\text{CDCl}_3$ ,  $\delta_{\text{H}}=7.26$  ppm,  $\delta_{\text{C}}=77.23$  ppm). The chemical shifts are referenced to signals at 7.26 and 77.0 ppm, respectively. Chemical shifts ( $\delta$ ) are reported in ppm and quoted to the nearest 0.01 ppm relative to the residual protons in  $\text{CDCl}_3$  (7.26 ppm for  $^1\text{H}$ ) or TMS (0.0 ppm for  $^1\text{H}$ ) and  $\text{CDCl}_3$  (77.0 ppm for  $^{13}\text{C}$ ). The melting point is determined by WRR melting point apparatus. HRMS data were obtained from a high-resolution mass spectrometer (LCMS-IT-TOF). The progress of the reaction is monitored by thin layer chromatography (TLC).

## B. Procedure for the Preparation of 3 and 5

To 25.0 mL Schlenk tube was added aldehydes (0.5 mmol), amine (0.6 mmol), **TC-5** (1.0 mol%, 2.81 mg),  $\text{PhSiH}_3$  (4.0 equivalent, 2.0 mmol), as well as toluene (2.0 mL) were added successively. The mixture was stirred for 13 h under sealed conditions at 80 °C. After the reaction was completed, the solution was quenched with 2.0 mL 3M NaOH aqueous solution and stirred. The mixture was extracted with ethyl acetate (5.0 mL\*3). The organic layer was dried with anhydrous  $\text{MgSO}_4$ , removed in vacuum, and purified by column chromatography on silica gel with dichloromethane/methanol (7:1 ~ 20:1) as eluting solvents to afford the desired products **3 and 5**. The optically pure products was determined with Chiral OD or OJ column.

## C. Analysis Data for the Products

**1-Cinnamyl-4-methylpiperazine(3aa):**  Prepared in 97% yield (105.6mg), yellow oil.  $^1\text{H}$  NMR (400 MHz,  $\text{CDCl}_3$ )  $\delta$  7.38 (d,  $J = 7.9$  Hz, 2H), 7.31 (t,  $J = 7.4$  Hz, 2H), 7.23 (t,  $J = 7.2$  Hz, 1H), 6.53 (d,  $J = 15.8$  Hz, 1H), 6.33-6.23 (m, 1H), 3.17 (d,  $J = 6.8$  Hz, 2H), 2.53 (s, 8H), 2.31 (s, 3H).  $^{13}\text{C}\{^1\text{H}\}$  NMR (101 MHz,  $\text{CDCl}_3$ , ppm)  $\delta$  136.9, 133.2, 128.6, 127.5, 126.5, 126.3, 61.1, 55.1, 53.2, 46.1.

**(E)-1-methyl-4-(3-(p-tolyl)allyl)piperazine(3ba):** Prepared in 81% yield (93 mg), yellow oil.  $^1\text{H}$  NMR (400 MHz,  $\text{CDCl}_3$ )  $\delta$  7.21-7.16 (m, 2H), 7.03 (d,  $J = 8.0$  Hz, 2H), 6.41 (d,  $J = 15.8$  Hz, 1H), 6.14 (dt,  $J = 15.8, 6.8$  Hz, 1H), 3.07 (d,  $J = 6.9$  Hz, 2H),

2.41 (s, 8H), 2.25 (s, 3H), 2.22 (s, 3H).  $^{13}\text{C}\{^1\text{H}\}$  NMR (101 MHz,  $\text{CDCl}_3$ , ppm)  $\delta$  137.3, 134.1, 133.0, 129.3, 126.2, 125.5, 61.1, 55.1, 53.2, 46.1, 21.2. HRMS-ESI (m/z):  $[\text{M}+\text{H}]^+$  Calcd for  $\text{C}_{15}\text{H}_{23}\text{N}_2$  231.1861; Found 231.1862.

**(E)-1-(3-(4-methoxyphenyl)allyl)-4-methylpiperazine(3ca):** Prepared in 87% yield (107 mg), yellow oil.  $^1\text{H}$  NMR (400 MHz,  $\text{CDCl}_3$ )  $\delta$  7.31 (d,  $J = 8.5$  Hz, 2H), 6.85 (d,  $J = 8.5$  Hz, 2H), 6.46 (d,  $J = 15.8$  Hz, 1H), 6.18-6.08 (m, 1H), 3.80 (s, 3H), 3.14 (d,  $J = 6.8$  Hz, 2H), 2.54 (s, 8H), 2.30 (s, 3H).  $^{13}\text{C}\{^1\text{H}\}$  NMR (101 MHz,  $\text{CDCl}_3$ , ppm)  $\delta$  159.1, 132.6, 129.7, 127.5, 124.2, 114.0, 61.2, 55.3, 55.1, 53.1, 46.0. HRMS-ESI (m/z):  $[\text{M}+\text{H}]^+$  Calcd for  $\text{C}_{15}\text{H}_{23}\text{N}_2\text{O}$  247.1810; Found 247.1813.

**(E)-1-(3-(4-fluorophenyl)allyl)-4-methylpiperazine(3da):** Prepared in 63% yield (73.7 mg), yellow oil.  $^1\text{H}$  NMR (400 MHz,  $\text{CDCl}_3$ )  $\delta$  7.33 (dd,  $J = 7.8, 5.9$  Hz, 2H), 6.99 (t,  $J = 8.5$  Hz, 2H), 6.48 (d,  $J = 15.8$  Hz, 1H), 6.23-6.14 (m, 1H), 3.15 (d,  $J = 6.8$  Hz, 2H), 2.49 (s, 8H), 2.30 (s, 3H).  $^{13}\text{C}\{^1\text{H}\}$  NMR (101 MHz,  $\text{CDCl}_3$ , ppm)  $\delta$  162.2 (d,  $J = 246.6$  Hz), 133.1 (d,  $J = 3.4$  Hz), 131.9, 127.8 (d,  $J = 8.0$  Hz), 126.3 (d,  $J = 2.3$  Hz), 115.5 (d,  $J = 21.5$  Hz), 61.0, 55.1, 53.2, 46.1.  $^{19}\text{F}$  NMR (377 MHz,  $\text{CDCl}_3$ , ppm)  $\delta$  -114.62. HRMS-ESI (m/z):  $[\text{M}+\text{H}]^+$  Calcd for  $\text{C}_{14}\text{H}_{20}\text{FN}_2$  235.1611; Found 235.1615.

**(E)-N,N-dimethyl-4-(3-(4-methylpiperazin-1-yl)prop-1-en-1-yl)anilines(3ea):**

Prepared in 63% yield (91 mg), yellow oil.  $^1\text{H}$  NMR (400 MHz,  $\text{CDCl}_3$ )  $\delta$  7.21-7.15 (m, 2H), 6.57 (d,  $J = 8.8$  Hz, 2H), 6.33 (d,  $J = 15.8$  Hz, 1H), 5.97 (dt,  $J = 15.8, 6.9$  Hz, 1H), 3.03 (dd,  $J = 7.0, 1.3$  Hz, 2H), 2.84 (s, 6H), 2.39 (s, 8H), 2.20 (s, 3H).  $^{13}\text{C}\{^1\text{H}\}$  NMR (101 MHz,  $\text{CDCl}_3$ , ppm)  $\delta$  163.5, 161.0, 133.1, 133.1, 131.9, 127.8, 127.8, 126.3, 115.6, 115.4, 61.0, 55.1, 53.2, 46.1.  $[\text{M}+\text{Na}]^+$  Calcd for  $\text{C}_{16}\text{H}_{25}\text{N}_3\text{Na}$  282.1941; Found 282.1940.

**(E)-1-(3-(2-bromophenyl)allyl)-4-methylpiperazine(3fa):** Prepared in 84% yield (123.5 mg), yellow oil.  $^1\text{H}$  NMR (400 MHz,  $\text{CDCl}_3$ )  $\delta$  7.45 (t,  $J = 7.0$  Hz, 2H), 7.21-7.14 (m, 2H), 7.02 (t,  $J = 7.6$  Hz, 1H), 6.80 (d,  $J = 15.7$  Hz, 1H), 6.15 (dt,  $J = 15.3, 6.7$  Hz, 1H), 3.14 (d,  $J = 6.7$  Hz, 2H), 2.44 (s, 8H), 2.23 (s, 3H).  $^{13}\text{C}\{^1\text{H}\}$  NMR (101 MHz,  $\text{CDCl}_3$ , ppm)  $\delta$  136.8, 132.9, 131.8, 129.7, 128.8, 127.5, 127.1, 123.4, 60.9, 55.1, 53.2, 46.1. HRMS-ESI (m/z):  $[\text{M}+\text{H}]^+$  Calcd for  $\text{C}_{14}\text{H}_{20}\text{BrN}_2$  295.0810; Found

295.0815.

**(E)-1-(3-(2-methoxyphenyl)allyl)-4-methylpiperazine(3ga):** Prepared in 86% yield (106.3 mg), yellow oil. <sup>1</sup>H NMR (400 MHz, CDCl<sub>3</sub>) δ 7.37 (d, *J* = 7.6 Hz, 1H), 7.13 (t, *J* = 7.7 Hz, 1H), 6.83 (t, *J* = 7.5 Hz, 1H), 6.81-6.73 (m, 2H), 6.27-6.16 (m, 1H), 3.76 (d, *J* = 2.2 Hz, 3H), 3.11 (d, *J* = 6.7 Hz, 2H), 2.43 (s, 8H), 2.22 (d, *J* = 2.1 Hz, 3H). <sup>13</sup>C{<sup>1</sup>H} NMR (101 MHz, CDCl<sub>3</sub>, ppm) δ 156.5, 128.5, 127.9, 127.1, 126.8, 125.8, 120.6, 110.8, 61.5, 55.4, 55.1, 53.1, 46.0. HRMS-ESI (m/z): [M+H]<sup>+</sup> Calcd for C<sub>15</sub>H<sub>23</sub>N<sub>2</sub>O 247.1810; Found 247.1812.

**(E)-1-methyl-4-(3-(m-tolyl)allyl)piperazine(3ha):** Prepared in 94% yield (108.2 mg), yellow oil. <sup>1</sup>H NMR (400 MHz, CDCl<sub>3</sub>) δ 7.21-7.14 (m, 3H), 7.06-7.00 (m, 1H), 6.48 (d, *J* = 15.8 Hz, 1H), 6.25 (dt, *J* = 15.8, 6.8 Hz, 1H), 3.13 (d, *J* = 6.9 Hz, 2H), 2.48 (s, 8H), 2.32 (s, 3H), 2.28 (s, 3H). <sup>13</sup>C{<sup>1</sup>H} NMR (101 MHz, CDCl<sub>3</sub>, ppm) δ 138.0, 136.8, 133.2, 128.5, 128.3, 127.1, 126.3, 123.4, 61.1, 55.1, 53.1, 46.0, 21.4. [M+H]<sup>+</sup> Calcd for C<sub>15</sub>H<sub>23</sub>N<sub>2</sub> 231.1861; Found 231.1865.

**(E)-1-methyl-4-(2-methyl-3-phenylallyl)piperazine(3ia):** Prepared in 62% yield (71.3 mg), yellow oil. <sup>1</sup>H NMR (400 MHz, CDCl<sub>3</sub>) δ 7.28-7.18 (m, 5H), 7.15-7.10 (m, 1H), 6.35 (s, 1H), 2.95-2.92 (m, 2H), 2.39 (s, 8H), 2.22 (s, 3H), 1.83 (d, *J* = 1.3 Hz, 3H). <sup>13</sup>C{<sup>1</sup>H} NMR (101 MHz, CDCl<sub>3</sub>, ppm) δ 138.0, 135.9, 128.9, 128.1, 127.4, 126.2, 67.8, 55.3, 53.1, 46.1, 16.8. [M+H]<sup>+</sup> Calcd for C<sub>15</sub>H<sub>23</sub>N<sub>2</sub> 231.1861; Found 231.1865.

**(E)-1-(2-benzylideneheptyl)-4-methylpiperazine(3ja):** Prepared in 65% yield (93.0 mg), yellow oil. <sup>1</sup>H NMR (400 MHz, CDCl<sub>3</sub>) δ 7.23 (t, *J* = 7.4 Hz, 2H), 7.19-7.10 (m, 3H), 6.35 (s, 1H), 2.92 (s, 2H), 2.38 (s, 8H), 2.19 (d, *J* = 13.0 Hz, 5H), 1.19 (d, *J* = 11.6 Hz, 6H), 0.80 (t, *J* = 6.2 Hz, 3H). <sup>13</sup>C{<sup>1</sup>H} NMR (101 MHz, CDCl<sub>3</sub>, ppm) δ 140.4, 138.1, 128.7, 128.1, 127.2, 126.2, 65.1, 55.3, 53.3, 46.1, 32.0, 29.7, 27.9, 22.5, 14.1. [M+H]<sup>+</sup> Calcd for C<sub>19</sub>H<sub>31</sub>N<sub>2</sub> 287.2487; Found 287.2494.

**(E)-1-(3-(anthracen-9-yl)allyl)-4-methylpiperazine(3ka):** Prepared in 65% yield (102.7 mg), yellow oil. <sup>1</sup>H NMR (400 MHz, CDCl<sub>3</sub>) δ 8.28-8.26 (m, 1H), 8.22 (d, *J* = 9.7 Hz, 2H), 7.92-7.88 (m, 2H), 7.43-7.38 (m, 4H), 7.22 (d, *J* = 16.1 Hz, 1H), 6.07 (dt, *J* = 16.1, 6.6 Hz, 1H), 3.39 (dd, *J* = 6.6, 1.5 Hz, 2H), 2.55 (s, 8H), 2.27 (s, 3H).

$^{13}\text{C}\{^1\text{H}\}$  NMR (101 MHz,  $\text{CDCl}_3$ , ppm)  $\delta$  135.0, 132.2, 131.2, 129.2, 128.6, 128.4, 126.1, 125.7, 125.2, 124.8, 61.3, 54.9, 53.0, 45.8.  $[\text{M}+\text{H}]^+$  Calcd for  $\text{C}_{22}\text{H}_{25}\text{N}_2$  317.2018; Found 317.2021.

**(E)-1-(3-(furan-2-yl)allyl)-4-methylpiperazine(3la)**: Prepared in 60% yield (61.8 mg), yellow oil.  $^1\text{H}$  NMR (400 MHz,  $\text{CDCl}_3$ )  $\delta$  7.26 (d,  $J = 1.3$  Hz, 1H), 6.35-6.22 (m, 2H), 6.17-6.05 (m, 2H), 3.06 (d,  $J = 5.9$  Hz, 2H), 2.45 (s, 8H), 2.23 (s, 3H).  $^{13}\text{C}\{^1\text{H}\}$  NMR (101 MHz,  $\text{CDCl}_3$ , ppm)  $\delta$  152.6, 141.9, 125.3, 121.5, 111.2, 107.4, 60.7, 55.1, 53.1, 46.0.  $[\text{M}+\text{H}]^+$  Calcd for  $\text{C}_{12}\text{H}_{19}\text{N}_2\text{O}$  207.1497; Found 207.1500.

**(E)-1-methyl-4-(3-phenylbut-2-en-1-yl)piperazine(3ma)**: Prepared in 67% yield (77 mg), yellow oil.  $^1\text{H}$  NMR (400 MHz,  $\text{CDCl}_3$ )  $\delta$  7.43-7.38 (m, 2H), 7.31 (dd,  $J = 8.5, 6.6$  Hz, 2H), 7.27-7.23 (m, 1H), 5.89 (m, 1H), 3.21 (d,  $J = 6.8$  Hz, 2H), 2.52 (s, 8H), 2.32 (s, 3H), 2.06 (s, 3H).  $^{13}\text{C}\{^1\text{H}\}$  NMR (101 MHz,  $\text{CDCl}_3$ , ppm)  $\delta$  143.2, 137.8, 128.2, 127.0, 125.6, 124.2, 56.5, 55.0, 53.0, 45.9, 16.2.  $[\text{M}+\text{H}]^+$  Calcd for  $\text{C}_{15}\text{H}_{23}\text{N}_2$  231.1861; Found 231.1861.

**1-((2E,4E)-deca-2,4-dien-1-yl)-4-phenylpiperazine(3nb)**: Prepared in 65% yield (96.8 mg), yellow oil.  $^1\text{H}$  NMR (400 MHz,  $\text{CDCl}_3$ )  $\delta$  7.28 (d,  $J = 7.3$  Hz, 1H), 7.25 (d,  $J = 1.0$  Hz, 1H), 6.93 (d,  $J = 7.7$  Hz, 2H), 6.86 (t,  $J = 7.3$  Hz, 1H), 6.18 (dd,  $J = 14.9, 10.4$  Hz, 1H), 6.05 (dd,  $J = 15.0, 10.4$  Hz, 1H), 5.66 (m, 2H), 3.22 (t,  $J = 5.0$  Hz, 4H), 3.08 (d,  $J = 7.0$  Hz, 2H), 2.63 (t,  $J = 5.0$  Hz, 4H), 2.08 (q,  $J = 6.9$  Hz, 2H), 1.36-1.23 (m, 6H), 0.91-0.87 (m, 3H).  $^{13}\text{C}\{^1\text{H}\}$  NMR (101 MHz,  $\text{CDCl}_3$ , ppm)  $\delta$  151.3, 135.2, 129.5, 129.1, 119.8, 116.1, 60.8, 53.1, 49.1, 32.6, 31.5, 29.0, 22.6, 14.1.  $[\text{M}+\text{H}]^+$  Calcd for  $\text{C}_{20}\text{H}_{31}\text{N}_2$  299.2487; Found 299.2488.

**(E)-1-(2-methylpent-2-en-1-yl)-4-phenylpiperazine(3ob)**: Prepared in 72% yield (87.8 mg), yellow oil.  $^1\text{H}$  NMR (400 MHz,  $\text{CDCl}_3$ )  $\delta$  7.29-7.23 (m, 2H), 6.93 (d,  $J = 7.8$  Hz, 2H), 6.84 (t,  $J = 7.2$  Hz, 1H), 5.33 (t,  $J = 6.7$  Hz, 1H), 3.19 (s, 4H), 2.88 (s, 2H), 2.51 (s, 4H), 2.05 (p,  $J = 7.0$  Hz, 2H), 1.66 (s, 3H), 1.02-0.91 (m, 3H).  $^{13}\text{C}\{^1\text{H}\}$  NMR (101 MHz,  $\text{CDCl}_3$ , ppm)  $\delta$  151.5, 131.4, 130.3, 129.1, 119.5, 116.0, 67.4, 53.0, 49.2, 21.1, 15.0, 14.3.  $[\text{M}+\text{H}]^+$  Calcd for  $\text{C}_{16}\text{H}_{25}\text{N}_2$  245.2018; Found 245.2017.

**1-Cinnamyl-4-phenylpiperazine(3ab)**:<sup>[2]</sup> Prepared in 88% yield (122.3 mg), yellow oil.  $^1\text{H}$  NMR (400 MHz,  $\text{CDCl}_3$ )  $\delta$  7.31 (d,  $J = 7.5$  Hz, 2H), 7.26-7.12 (m, 5H), 6.84

(d,  $J = 8.2$  Hz, 2H), 6.77 (t,  $J = 7.3$  Hz, 1H), 6.47 (d,  $J = 15.9$  Hz, 1H), 6.23 (dt,  $J = 15.7, 6.8$  Hz, 1H), 3.13 (t,  $J = 5.2$  Hz, 6H), 2.61-2.53 (m, 4H).  $^{13}\text{C}\{^1\text{H}\}$  NMR (101 MHz,  $\text{CDCl}_3$ , ppm)  $\delta$  151.4, 136.9, 133.4, 129.2, 128.7, 127.7, 126.4, 119.8, 116.2, 61.2, 53.3, 49.2.

**1-Benzyl-4-cinnamylpiperazine(3ac):**<sup>[3]</sup> Prepared in 80% yield (116.8 mg), yellow oil.  $^1\text{H}$  NMR (400 MHz,  $\text{CDCl}_3$ )  $\delta$  7.29 (d,  $J = 7.6$  Hz, 2H), 7.24 (d,  $J = 4.9$  Hz, 6H), 7.16 (d,  $J = 13.8$  Hz, 2H), 6.44 (d,  $J = 15.8$  Hz, 1H), 6.20 (dt,  $J = 15.8, 6.8$  Hz, 1H), 3.45 (s, 2H), 3.09 (d,  $J = 6.8$  Hz, 2H), 2.45 (s, 8H).  $^{13}\text{C}\{^1\text{H}\}$  NMR (101 MHz,  $\text{CDCl}_3$ , ppm)  $\delta$  138.1, 136.9, 133.1, 129.3, 128.6, 128.2, 127.5, 127.1, 126.6, 126.3, 63.1, 61.1, 53.2, 53.1.

**1-Cinnamyl-4-cyclohexylpiperazine(3ad):** Prepared in 81% yield (115.3 mg), yellow oil.  $^1\text{H}$  NMR (400 MHz,  $\text{CDCl}_3$ )  $\delta$  7.30 (d,  $J = 7.4$  Hz, 2H), 7.22 (dd,  $J = 14.4, 6.7$  Hz, 2H), 7.15 (t,  $J = 7.2$  Hz, 1H), 6.45 (d,  $J = 15.8$  Hz, 1H), 6.22 (dt,  $J = 15.8, 6.8$  Hz, 1H), 3.08 (d,  $J = 6.7$  Hz, 2H), 2.56 (s, 8H), 2.17 (dt,  $J = 10.3, 5.2$  Hz, 1H), 1.82 (d,  $J = 8.8$  Hz, 2H), 1.76-1.68 (m, 2H), 1.55 (d,  $J = 12.2$  Hz, 1H), 1.23-1.00 (m, 5H).  $^{13}\text{C}\{^1\text{H}\}$  NMR (101 MHz,  $\text{CDCl}_3$ , ppm)  $\delta$  136.9, 133.1, 128.6, 127.5, 126.7, 126.3, 63.5, 61.2, 53.7, 48.9, 29.0, 26.3, 25.9.  $[\text{M}+\text{H}]^+$  Calcd for  $\text{C}_{19}\text{H}_{29}\text{N}_2$  285.2331; Found 285.2333.

**(4-Cinnamylpiperazin-1-yl)(phenyl)methanone(3ae):** Prepared in 51% yield (78.3 mg), yellow oil.  $^1\text{H}$  NMR (400 MHz,  $\text{CDCl}_3$ )  $\delta$  7.31 (d,  $J = 15.2$  Hz, 7H), 7.24 (t,  $J = 7.6$  Hz, 2H), 7.17 (d,  $J = 10.2$  Hz, 1H), 6.46 (d,  $J = 15.7$  Hz, 1H), 6.23-6.12 (m, 1H), 3.75 (s, 2H), 3.38 (s, 2H), 3.12 (d,  $J = 6.8$  Hz, 2H), 2.44 (d,  $J = 60.3$  Hz, 4H).  $^{13}\text{C}\{^1\text{H}\}$  NMR (101 MHz,  $\text{CDCl}_3$ , ppm)  $\delta$  170.4, 136.7, 135.8, 133.6, 129.7, 128.6, 128.5, 127.7, 127.1, 126.4, 125.8, 61.0.  $[\text{M}+\text{H}]^+$  Calcd for  $\text{C}_{20}\text{H}_{23}\text{N}_2\text{O}$  307.1810; Found 307.1816.

**1-Benzyl-4-cinnamyl-1,4-diazepane(3af):** Prepared in 83% yield (127.0 mg), yellow oil.  $^1\text{H}$  NMR (400 MHz,  $\text{CDCl}_3$ )  $\delta$  7.31-7.21 (m, 8H), 7.19-7.06 (m, 3H), 6.40 (d,  $J = 15.9$  Hz, 1H), 6.28-6.15 (m, 1H), 3.55 (s, 2H), 3.19 (d,  $J = 6.6$  Hz, 2H), 2.70-2.59 (m, 8H), 1.72 (m, 2H).  $^{13}\text{C}\{^1\text{H}\}$  NMR (101 MHz,  $\text{CDCl}_3$ , ppm)  $\delta$  139.60, 137.11, 132.4, 128.9, 128.6, 128.2, 127.9, 127.4, 126.9, 126.3, 62.9, 61.1, 55.3, 54.9, 54.5, 27.7.

[M+H]<sup>+</sup> Calcd for C<sub>21</sub>H<sub>26</sub>N<sub>2</sub> 307.2174; Found 307.2179.

**(E)-3-phenyl-N, N-dipropylprop-2-en-1-amine(3ag):**<sup>[4]</sup> Prepared in 82% yield (89.0 mg), yellow oil. <sup>1</sup>H NMR (400 MHz, CDCl<sub>3</sub>, ppm) δ 7.38 (d, *J* = 7.0 Hz, 2H), 7.30 (t, *J* = 7.6 Hz, 2H), 7.25-7.19 (m, 1H), 6.50 (d, *J* = 15.9 Hz, 1H), 6.29 (dt, *J* = 15.9, 6.6 Hz, 1H), 3.24 (dd, *J* = 6.6, 1.4 Hz, 2H), 2.46-2.38 (m, 4H), 1.55-1.43 (m, 4H), 0.88 (t, *J* = 7.4 Hz, 6H). <sup>13</sup>C{<sup>1</sup>H} NMR (101 MHz, CDCl<sub>3</sub>, ppm) δ 137.3, 131.9, 128.6, 128.1, 127.3, 126.3, 56.8, 56.0, 20.2, 12.1.

**N-butyl-N-cinnamylbutan-1-amine(3ah):**<sup>[1]</sup> Prepared in 86% yield (105.4 mg), yellow oil. <sup>1</sup>H NMR (400 MHz, CDCl<sub>3</sub>) δ 7.38 (d, *J* = 7.0 Hz, 2H), 7.30 (t, *J* = 7.6 Hz, 2H), 7.22 (q, *J* = 6.8 Hz, 1H), 6.50 (d, *J* = 15.9 Hz, 1H), 6.29 (m, 1H), 3.24 (dd, *J* = 6.7, 1.4 Hz, 2H), 2.49-2.41 (m, 4H), 1.51-1.41 (m, 4H), 1.34-1.26 (m, 4H), 0.91 (t, *J* = 7.3 Hz, 6H). <sup>13</sup>C{<sup>1</sup>H} NMR (101 MHz, CDCl<sub>3</sub>, ppm) δ 137.3, 132.0, 128.6, 128.1, 127.3, 126.3, 56.7, 53.6, 29.2, 20.8, 14.2.

**(E)-N-methyl-N-(naphthalen-2-ylmethyl)-3-phenylprop-2-en-1-amine(3ai):**<sup>[5]</sup> Prepared in 93% yield (133.5 mg), yellow oil. <sup>1</sup>H NMR (400 MHz, CDCl<sub>3</sub>) δ 8.19 (d, *J* = 7.6 Hz, 1H), 7.72 (d, *J* = 8.1 Hz, 1H), 7.65 (d, *J* = 8.2 Hz, 1H), 7.44-7.26 (m, 6H), 7.23-7.16 (m, 2H), 7.11 (dt, *J* = 8.8, 4.7 Hz, 1H), 6.46 (d, *J* = 15.8 Hz, 1H), 6.32-6.22 (m, 1H), 3.82 (s, 2H), 3.15 (d, *J* = 6.9 Hz, 2H), 2.15 (s, 3H). <sup>13</sup>C{<sup>1</sup>H} NMR (101 MHz, CDCl<sub>3</sub>, ppm) δ 137.2, 135.0, 134.0, 132.8, 132.6, 128.7, 128.6, 128.6, 128.1, 127.7, 127.6, 127.5, 126.5, 126.0, 125.7, 125.3, 124.8, 60.6, 60.2, 42.6.

**1-Benzhydryl-4-cinnamylpiperazine(3aj):**<sup>[1]</sup> Prepared in 75% yield (138.1 mg), yellow oil. <sup>1</sup>H NMR (400 MHz, CDCl<sub>3</sub>) δ 7.41 (d, *J* = 8.0 Hz, 4H), 7.36 (d, *J* = 8.1 Hz, 2H), 7.32-7.27 (m, 3H), 7.23 (d, *J* = 10.7 Hz, 3H), 7.19-7.13 (m, 2H), 6.51 (d, *J* = 15.8 Hz, 1H), 6.27 (m, 1H), 4.23 (s, 1H), 3.18 (d, *J* = 6.8 Hz, 2H), 2.54 (s, 8H). <sup>13</sup>C{<sup>1</sup>H} NMR (101 MHz, CDCl<sub>3</sub>, ppm) δ 142.8, 137.0, 133.1, 128.6, 128.5, 128.0, 127.5, 126.9, 126.6, 126.4, 61.1, 53.5, 51.9.

**1-(Bis(4-fluorophenyl)methyl)-4-cinnamylpiperazine(3ak):**<sup>[4]</sup> Prepared in 79% yield (159.5 mg), yellow oil. <sup>1</sup>H NMR (400 MHz, CDCl<sub>3</sub>) δ 7.41 (d, *J* = 8.0 Hz, 4H), 7.36 (d, *J* = 8.1 Hz, 2H), 7.33-7.27 (m, 3H), 7.23 (d, *J* = 10.2 Hz, 2H), 7.17 (t, *J* = 7.2 Hz, 2H), 6.51 (m, 1H), 6.27 (m, 1H), 4.23 (s, 1H), 3.18 (d, *J* = 6.8 Hz, 2H), 2.53 (s,

8H).  $^{13}\text{C}\{^1\text{H}\}$  NMR (101 MHz,  $\text{CDCl}_3$ , ppm)  $\delta$  161.8 (d,  $J = 245.6$  Hz), 138.2 (d,  $J = 3.2$  Hz), 136.8, 133.4, 129.3 (d,  $J = 7.9$  Hz), 128.6, 127.6, 126.3, 126.1, 115.4 (d,  $J = 21.2$  Hz), 75.5, 60.9, 53.3, 51.6.  $^{19}\text{F}$  NMR (377 MHz,  $\text{CDCl}_3$ , ppm)  $\delta$  -115.69.

**(E)-N-(2-(1H-indol-2-yl)ethyl)-N-benzyl-3-phenylprop-2-en-1-amine(3al):<sup>[6]</sup>**

Prepared in 90% yield (164.5 mg), yellow oil.  $^1\text{H}$  NMR (400 MHz,  $\text{CDCl}_3$ )  $\delta$  7.88 (s, 1H), 7.49 (d,  $J = 8.3$  Hz, 1H), 7.39- 7.27 (m, 9H), 7.25-7.18 (m, 2H), 7.17-7.12 (m, 1H), 7.02 (ddd,  $J = 8.0, 6.9, 1.0$  Hz, 1H), 6.91 (d,  $J = 2.3$  Hz, 1H), 6.57-6.50 (m, 1H), 6.31 (dt,  $J = 15.9, 6.6$  Hz, 1H), 3.75 (s, 2H), 3.36 (dd,  $J = 6.6, 1.4$  Hz, 2H), 3.04-2.94 (m, 2H), 2.91-2.83 (m, 2H).  $^{13}\text{C}\{^1\text{H}\}$  NMR (101 MHz,  $\text{CDCl}_3$ , ppm)  $\delta$  139.6, 137.3, 136.3, 132.5, 129.1, 128.6, 128.3, 127.8, 127.6, 127.4, 127.0, 126.4, 121.9, 121.6, 119.2, 119.0, 114.6, 111.1, 58.4, 56.3, 54.2, 23.1.

**N-Cinnamylaniline(5aa):<sup>[7]</sup>** Prepared in 96% yield (100.7 mg), yellow oil.  $^1\text{H}$  NMR (400 MHz,  $\text{CDCl}_3$ )  $\delta$  7.38-7.33 (m, 2H), 7.29 (dd,  $J = 8.3, 6.6$  Hz, 2H), 7.24-7.15 (m, 3H), 6.75-6.56 (m, 4H), 6.30 (dt,  $J = 15.9, 5.7$  Hz, 1H), 3.90 (dd,  $J = 5.8, 1.6$  Hz, 2H), 3.70 (s, 1H).  $^{13}\text{C}\{^1\text{H}\}$  NMR (101 MHz,  $\text{CDCl}_3$ , ppm)  $\delta$  148.1, 136.9, 131.6, 129.4, 128.7, 127.6, 127.1, 126.4, 117.7, 113.1, 46.3.

**N-Cinnamyl-4-methoxyaniline(5ab):<sup>[7]</sup>** Prepared in 70% yield (84.0 mg), yellow oil.  $^1\text{H}$  NMR (400 MHz,  $\text{CDCl}_3$ )  $\delta$  7.35 (d,  $J = 9.1$  Hz, 2H), 7.29 (t,  $J = 6.6$  Hz, 2H), 7.21 (t,  $J = 7.7$  Hz, 1H), 6.82-6.74 (m, 2H), 6.65-6.55 (m, 3H), 6.31 (dt,  $J = 15.9, 5.8$  Hz, 1H), 3.86 (d,  $J = 5.9$  Hz, 2H), 3.72 (s, 3H), 3.54 (s, 1H).  $^{13}\text{C}\{^1\text{H}\}$  NMR (101 MHz,  $\text{CDCl}_3$ , ppm)  $\delta$  152.3, 142.3, 137.0, 131.5, 128.7, 127.6, 127.4, 126.4, 114.9, 114.5, 55.8, 47.3.

**N-Cinnamyl-4-fluoroaniline(5ac):<sup>[8]</sup>** Prepared in 86% yield (97.6 mg), yellow oil.  $^1\text{H}$  NMR (400 MHz,  $\text{CDCl}_3$ )  $\delta$  7.40-7.27 (m, 4H), 7.23 (t,  $J = 7.1$  Hz, 1H), 6.89 (t,  $J = 8.1$  Hz, 2H), 6.60 (dd,  $J = 10.2, 5.0$  Hz, 3H), 6.30 (dt,  $J = 15.8, 5.7$  Hz, 1H), 3.88 (d,  $J = 5.8$  Hz, 2H), 3.73 (s, 1H).  $^{13}\text{C}\{^1\text{H}\}$  NMR (101 MHz,  $\text{CDCl}_3$ , ppm)  $\delta$  156.0 (d,  $J = 235.0$  Hz), 144.4, 144.4, 136.8, 131.7, 128.7, 127.7, 126.9, 126.4, 115.7 (d,  $J = 22.4$  Hz), 113.9 (d,  $J = 7.3$  Hz), 46.9.  $^{19}\text{F}$  NMR (377 MHz,  $\text{CDCl}_3$ , ppm)  $\delta$  -127.78.

**Cinnamyl-4-(trifluoromethyl)aniline(5ad):<sup>[4]</sup>** Prepared in 93% yield (129.0 mg), white solid; m.p. 72-74°C.  $^1\text{H}$  NMR (400 MHz,  $\text{CDCl}_3$ )  $\delta$  7.42-7.28 (m, 6H), 7.25 (d,  $J$



= 7.1 Hz, 1H), 6.68-6.56 (m, 3H), 6.28 (dt,  $J = 15.8, 5.7$  Hz, 1H), 4.21 (s, 1H), 3.96 (s, 2H).  $^{13}\text{C}\{^1\text{H}\}$  NMR (101 MHz,  $\text{CDCl}_3$ , ppm)  $\delta$  150.4, 136.6, 132.0, 128.7, 127.8, 126.7 (q,  $J = 3.8$  Hz), 126.4, 125.9, 123.7, 119.0 (q,  $J = 32.3$  Hz), 112.1, 45.7.  $^{19}\text{F}$  NMR (377 MHz,  $\text{CDCl}_3$ , ppm)  $\delta$  -60.98.

**Methyl 4-(cinnamylamino)benzoate(5ae):**<sup>[8]</sup> Prepared in 75% yield (100.3 mg), white solid, m.p.88-90°C.  $^1\text{H}$  NMR (400 MHz,  $\text{CDCl}_3$ )  $\delta$  7.87 (d,  $J = 8.5$  Hz, 2H), 7.33 (dd,  $J = 16.0, 7.5$  Hz, 4H), 7.23 (s, 1H), 6.62-6.55 (m, 3H), 6.26 (dt,  $J = 15.9, 5.6$  Hz, 1H), 4.38 (s, 1H), 3.96 (s, 2H), 3.84 (s, 3H).  $^{13}\text{C}\{^1\text{H}\}$  NMR (101 MHz,  $\text{CDCl}_3$ , ppm)  $\delta$  167.4, 151.8, 136.6, 132.0, 131.6, 128.7, 127.8, 126.4, 125.8, 118.5, 111.8, 51.6, 45.5.

**2-Chloro-*N*-cinnamylaniline(5af):**<sup>[9]</sup> Prepared in 51% yield (62.0 mg), yellow oil.  $^1\text{H}$  NMR (400 MHz,  $\text{CDCl}_3$ )  $\delta$  7.39-7.29 (m, 4H), 7.26-7.21 (m, 1H), 7.07 (t,  $J = 8.0$  Hz, 1H), 6.67 (d,  $J = 7.9$  Hz, 1H), 6.65- 6.56 (m, 2H), 6.51 (dd,  $J = 8.3, 2.3$  Hz, 1H), 6.28 (dt,  $J = 15.8, 5.4$  Hz, 1H), 3.90 (d,  $J = 6.0$  Hz, 3H).  $^{13}\text{C}\{^1\text{H}\}$  NMR (101 MHz,  $\text{CDCl}_3$ , ppm)  $\delta$  149.1, 136.7, 135.1, 131.9, 130.3, 128.7, 127.7, 126.4, 126.3, 117.5, 112.6, 111.3, 46.0.

***N*-Cinnamyl-2-iodoaniline(5ag):**<sup>[10]</sup> Prepared in 93% yield (155.8 mg), yellow oil.  $^1\text{H}$  NMR (400 MHz,  $\text{CDCl}_3$ )  $\delta$  7.67 (dd,  $J = 7.8, 1.5$  Hz, 1H), 7.39-7.16 (m, 6H), 6.69-6.57 (m, 2H), 6.50-6.40 (m, 1H), 6.31 (dt,  $J = 15.9, 5.6$  Hz, 1H), 4.39 (s, 1H), 3.97 (t,  $J = 6.3$  Hz, 2H).  $^{13}\text{C}\{^1\text{H}\}$  NMR (101 MHz,  $\text{CDCl}_3$ , ppm)  $\delta$  147.1, 139.1, 136.7, 131.8, 129.5, 128.7, 127.7, 126.5, 126.3, 118.9, 111.1, 85.5, 46.4.

***N*-Cinnamyl-naphthalen-2-amine(5ah):**<sup>[10]</sup> Prepared in 65% yield (84.3 mg), white solid; m.p.45-46°C.  $^1\text{H}$  NMR (400 MHz,  $\text{CDCl}_3$ )  $\delta$  7.59-7.48 (m, 3H), 7.29-7.18 (m, 5H), 7.11 (dd,  $J = 16.4, 7.2$  Hz, 2H), 6.82- 6.71 (m, 2H), 6.53 (d,  $J = 15.9$  Hz, 1H), 6.24 (dt,  $J = 15.9, 5.6$  Hz, 1H), 3.88 (d,  $J = 5.8$  Hz, 3H).  $^{13}\text{C}\{^1\text{H}\}$  NMR (101 MHz,  $\text{CDCl}_3$ , ppm)  $\delta$  145.7, 136.9, 135.3, 131.8, 129.1, 128.7, 127.8, 127.7, 126.7, 126.5, 126.1, 122.2, 118.1, 104.9, 46.2.

**(*E*)-3-Phenyl-*N*-(1-phenylethyl)prop-2-en-1-amine(5ai):**<sup>[4]</sup> Prepared in 73% yield (86.5 mg), yellow oil.  $^1\text{H}$  NMR (400 MHz,  $\text{CDCl}_3$ )  $\delta$  7.47-7.19 (m, 11H), 6.50-6.42 (m, 1H), 6.28 (dt,  $J = 15.8, 6.3$  Hz, 1H), 3.86 (q,  $J = 6.6$  Hz, 1H), 3.26 (d,  $J = 6.4$  Hz,

2H), 1.39 (d,  $J = 6.6$  Hz, 3H).  $^{13}\text{C}\{^1\text{H}\}$  NMR (101 MHz,  $\text{CDCl}_3$ , ppm)  $\delta$  145.4, 137.2, 131.2, 128.6, 128.5, 127.4, 127.0, 126.7, 126.3, 57.6, 49.7, 24.3.

***N*-(1-(naphthalen-1-yl)ethyl)-3-phenylprop-2-en-1-amine(5aj)**: Prepared in 60% yield (86.3 mg), yellow oil.  $^1\text{H}$  NMR (400 MHz,  $\text{CDCl}_3$ )  $\delta$  8.15 (d,  $J = 7.4$  Hz, 1H), 7.87-7.81 (m, 1H), 7.72 (d,  $J = 8.1$  Hz, 1H), 7.66 (d,  $J = 7.1$  Hz, 1H), 7.49-7.41 (m, 3H), 7.33-7.23 (m, 4H), 7.17 (t,  $J = 7.2$  Hz, 1H), 6.42 (d,  $J = 15.9$  Hz, 1H), 6.29 (dt,  $J = 15.9, 6.2$  Hz, 1H), 4.69 (q,  $J = 6.6$  Hz, 1H), 3.31 (qd,  $J = 14.0, 6.2$  Hz, 2H), 1.67 (s, 1H), 1.49 (d,  $J = 6.6$  Hz, 3H).  $^{13}\text{C}\{^1\text{H}\}$  NMR (101 MHz,  $\text{CDCl}_3$ , ppm)  $\delta$  141.2, 137.3, 134.1, 131.5, 131.4, 129.2, 128.7, 128.7, 127.5, 127.4, 126.4, 126.0, 125.9, 125.5, 123.1, 122.8, 52.8, 49.9, 23.8.  $[\text{M}+\text{H}]^+$  Calcd for  $\text{C}_{21}\text{H}_{22}\text{N}$  288.1752; Found 288.1749.

***(E)*-*N*-benzhydryl-3-phenylprop-2-en-1-amine(5ak)**:<sup>[5]</sup> Prepared in 90% yield (135.0 mg), yellow oil.  $^1\text{H}$  NMR (400 MHz,  $\text{CDCl}_3$ )  $\delta$  7.44-7.38 (m, 4H), 7.37-7.34 (m, 2H), 7.29 (td,  $J = 7.7, 2.2$  Hz, 6H), 7.23-7.18 (m, 3H), 6.53-6.44 (m, 1H), 6.31 (dt,  $J = 15.9, 6.2$  Hz, 1H), 4.91 (s, 1H), 3.36 (dd,  $J = 6.3, 1.4$  Hz, 2H).  $^{13}\text{C}\{^1\text{H}\}$  NMR (101 MHz,  $\text{CDCl}_3$ , ppm)  $\delta$  144.0, 137.2, 131.4, 128.6, 128.6, 128.5, 128.5, 127.4, 127.1, 126.3, 66.6, 50.0.

***(E)*-*N*-(3,3-diphenylpropyl)-3-phenylprop-2-en-1-amine(5al)**: Prepared in 80% yield (130.5 mg), yellow oil.  $^1\text{H}$  NMR (400 MHz,  $\text{CDCl}_3$ )  $\delta$  7.32 (t,  $J = 7.5$  Hz, 5H), 7.26-7.10 (m, 10H), 6.44 (d,  $J = 15.8$  Hz, 1H), 6.22 (dt,  $J = 15.8, 6.3$  Hz, 1H), 4.01 (t,  $J = 7.8$  Hz, 1H), 3.32 (d,  $J = 6.3$  Hz, 2H), 2.61 (t,  $J = 7.3$  Hz, 2H), 2.26 (q,  $J = 7.5$  Hz, 2H).  $^{13}\text{C}\{^1\text{H}\}$  NMR (101 MHz,  $\text{CDCl}_3$ , ppm)  $\delta$  144.8, 137.2, 131.3, 128.6, 128.6, 128.4, 127.9, 127.4, 126.3, 126.3, 51.8, 49.2, 47.9, 36.0.  $[\text{M}+\text{H}]^+$  Calcd for  $\text{C}_{24}\text{H}_{26}\text{N}$  328.2065; Found 328.2068.

***N*-Cinnamyloctan-1-amine(5am)**:<sup>[4]</sup> Prepared in 77% yield (94.0 mg), yellow oil.  $^1\text{H}$  NMR (400 MHz,  $\text{CDCl}_3$ )  $\delta$  7.40-7.17 (m, 5H), 6.56-6.47 (m, 1H), 6.30 (dt,  $J = 15.9, 6.4$  Hz, 1H), 3.41 (dd,  $J = 6.4, 1.5$  Hz, 2H), 2.64 (t,  $J = 7.3$  Hz, 2H), 1.51 (p,  $J = 7.0$  Hz, 2H), 1.35-1.21 (m, 11H), 0.91-0.84 (m, 3H).  $^{13}\text{C}\{^1\text{H}\}$  NMR (101 MHz,  $\text{CDCl}_3$ , ppm)  $\delta$  137.1, 131.3, 128.6, 128.5, 127.4, 126.3, 52.0, 49.5, 31.9, 30.1, 29.6, 29.3, 27.4, 22.7, 14.2.

***N*-Cinnamyl-2,3-dihydro-1H-inden-1-amine(5an)**: Prepared in 67% yield (82.5

mg), yellow oil.  $^1\text{H}$  NMR (400 MHz,  $\text{CDCl}_3$ )  $\delta$  7.44-7.16 (m, 9H), 6.62-6.53 (m, 1H), 6.36 (dt,  $J = 15.8, 6.3$  Hz, 1H), 4.31 (t,  $J = 6.5$  Hz, 1H), 3.59-3.47 (m, 2H), 3.02 (ddd,  $J = 15.9, 8.5, 4.9$  Hz, 1H), 2.81 (ddd,  $J = 15.7, 8.2, 7.0$  Hz, 1H), 2.48-2.38 (m, 1H), 1.86 (dddd,  $J = 12.9, 8.5, 7.0, 6.1$  Hz, 1H).  $^{13}\text{C}\{^1\text{H}\}$  NMR (101 MHz,  $\text{CDCl}_3$ , ppm)  $\delta$  145.2, 143.7, 137.2, 131.3, 128.7, 128.6, 127.5, 127.4, 126.3, 124.9, 124.2, 62.8, 49.6, 33.8, 30.4.  $[\text{M}+\text{H}]^+$  Calcd for  $\text{C}_{18}\text{H}_{20}\text{N}$  250.1596; Found 250.1600.

**(E)-3-Phenyl-N-(3-phenylpropyl)prop-2-en-1-amine(5ao):** Prepared in 71% yield (89.3 mg), yellow oil.  $^1\text{H}$  NMR (400 MHz,  $\text{CDCl}_3$ )  $\delta$  7.39-7.16 (m, 10H), 6.51 (dt,  $J = 15.7, 1.5$  Hz, 1H), 6.29 (dt,  $J = 15.8, 6.4$  Hz, 1H), 3.40 (dd,  $J = 6.4, 1.5$  Hz, 2H), 2.68 (dt,  $J = 11.9, 7.6$  Hz, 4H), 1.85 (dt,  $J = 14.3, 7.7$  Hz, 3H).  $^{13}\text{C}\{^1\text{H}\}$  NMR (101 MHz,  $\text{CDCl}_3$ , ppm)  $\delta$  142.1, 137.1, 131.4, 128.6, 128.4, 128.4, 128.3, 127.4, 126.3, 125.9, 51.9, 48.9, 33.7, 31.7.  $[\text{M}+\text{H}]^+$  Calcd for  $\text{C}_{18}\text{H}_{22}\text{N}$  252.1752; Found 252.1750.

**(E)-N-(2-ethylhex-2-en-1-yl)aniline(5pa):** Prepared in 69% yield (70.0 mg), yellow oil.  $^1\text{H}$  NMR (400 MHz,  $\text{CDCl}_3$ )  $\delta$  7.15 (dd,  $J = 8.5, 7.3$  Hz, 2H), 6.70-6.65 (m, 1H), 6.62-6.58 (m, 2H), 5.37 (t,  $J = 7.3$  Hz, 1H), 3.76-3.60 (m, 3H), 2.06 (dq,  $J = 33.0, 7.4$  Hz, 4H), 1.39-1.33 (m, 2H), 1.01 (t,  $J = 7.6$  Hz, 3H), 0.89 (t,  $J = 7.4$  Hz, 3H).  $^{13}\text{C}\{^1\text{H}\}$  NMR (101 MHz,  $\text{CDCl}_3$ , ppm)  $\delta$  148.7, 138.1, 129.2, 126.3, 117.1, 112.9, 49.4, 29.6, 23.0, 22.0, 13.9, 13.4.  $[\text{M}+\text{H}]^+$  Calcd for  $\text{C}_{21}\text{H}_{22}\text{N}$  204.1752; Found 204.1757.

## D. References

- [1] Xie, Y.; Hu, J.; Wang, Y.; Xia, C.; Huang, H. *J. Am. Chem. Soc.* **2012**, *134*, 20613-20616.
- [2] G. Hirata, H. Satomura, H. Kumagae, A. Shimizu, G. Onodera, M. Kimura, *Org. Lett.*, **2017**, *19*, 6148.
- [3] Liang, H.; Bao, L.; Du, Y.; Zhang, Y.; Pang, S.; Sun, C. *Synlett.* **2017**, *28*, 2675-2679.
- [4] D. Banerjee, R. V. Jagadeesh, K. Junge, H. Junge, M. Beller, *ChemSusChem.*, **2012**, *5*, 2039
- [5] (a) J.-Y. Jing, X.-H. Huo, J.-F. Shen, J.-K. Fu, Q.-H. Meng, W.-B. Zhang, *Chem. Commun.*, **2017**, *53*, 5151
- [6] Y. Jin, Y. Jing, C. Li, M. Li, W. Wu, Z. Ke, H. Jiang, *Nat. chem.*, **2022**, *14*, 1118.
- [7] Niu, Z.; Zhang, W.; Lan, P. C.; Aguila, B.; Ma, S. *Angew. Chem. Int. Ed.* **2019**, *58*, 7420-7424.
- [8] T. Ohshima, Y. Miyamoto, J. Ipposhi, Y. Nakahara, M. Utsunomiya, K. Mashima, *J. Am. Chem. Soc.*, **2009**, *131*, 14317.
- [9] Voronov, A. A.; Alekseeva, K. A.; Ryzhkova, E. A.; Zarubaev, V. V.; Galochkina, A. V.; Zaytsev, V. P.; Majik, M. S.; Tilve, S. G.; Gurbanov, A. V.; Zubkov, F. I. *Tetrahedron Lett.* **2018**, *59*, 1108-1111.
- [10] Takale, B. S.; Tao, S. M.; Yu, X. Q.; Feng, X. J.; Jin, T.; Bao, M.; Yamamoto, Y. *Org. Lett.* **2014**, *16*, 2558-2561.

## E. NMR Spectra

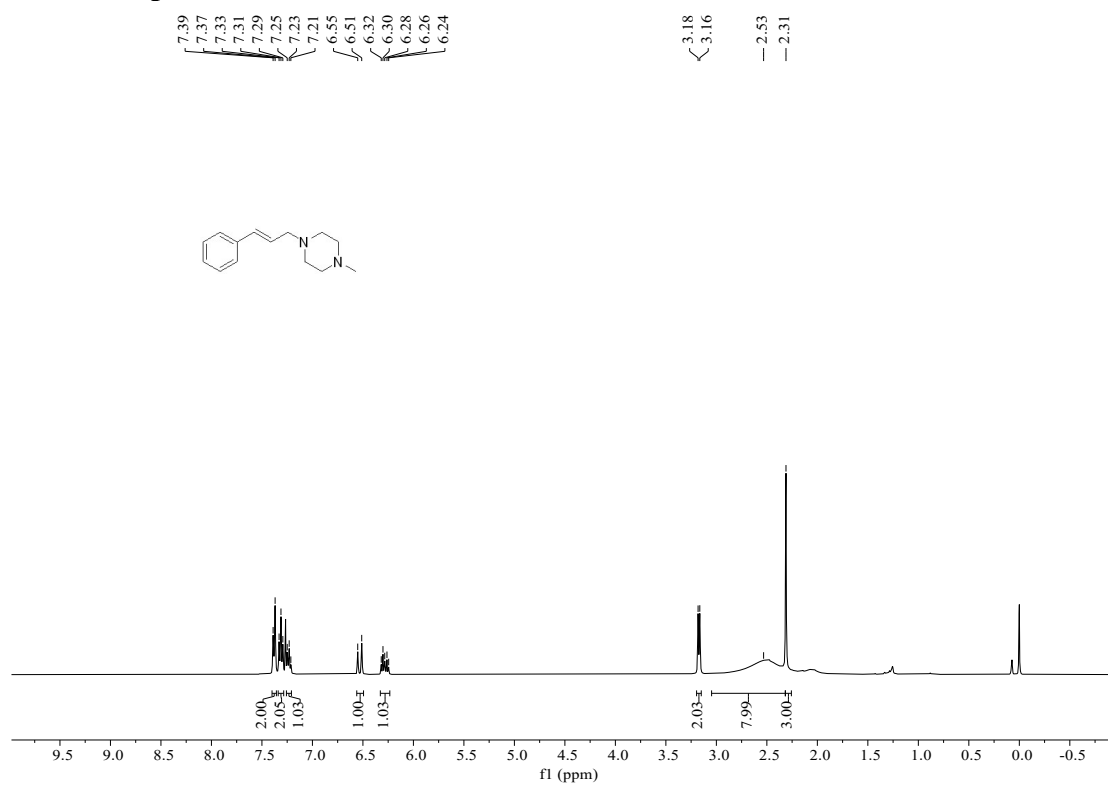

$^1\text{H}$  NMR Spectrum of **3aa** in  $\text{CDCl}_3$  at 400 MHz

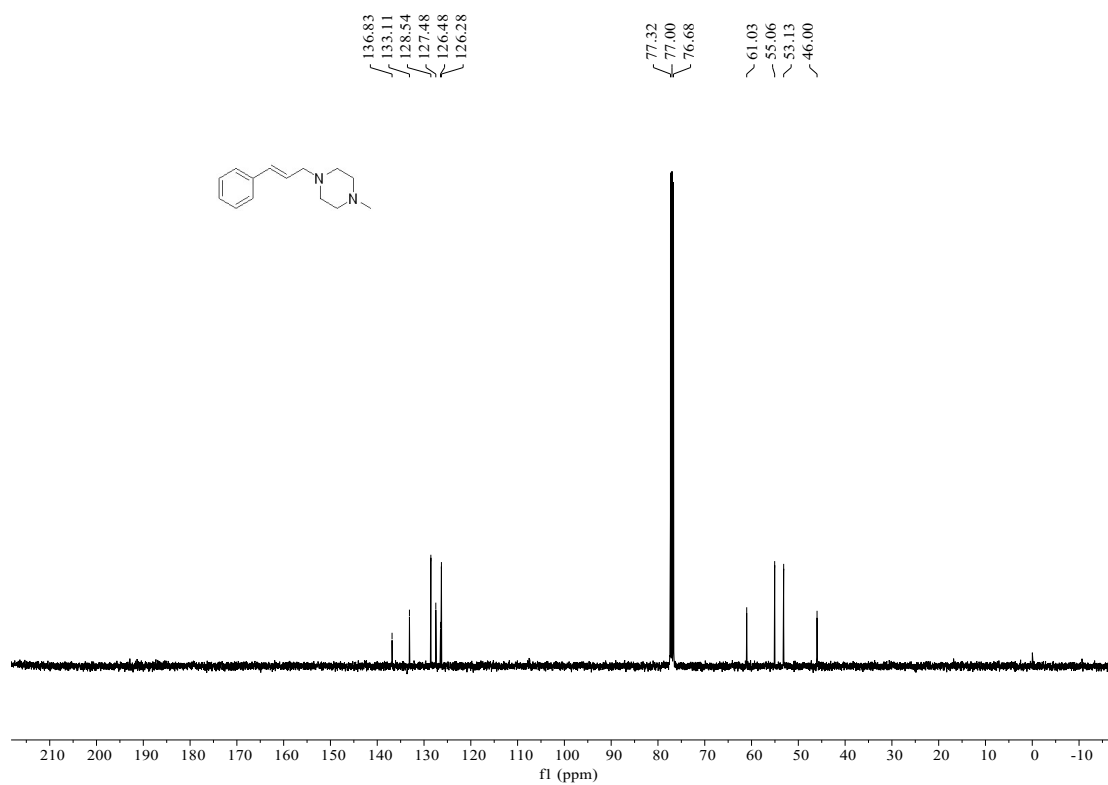

$^{13}\text{C}$  NMR Spectrum of **3aa** in  $\text{CDCl}_3$  at 100 MHz

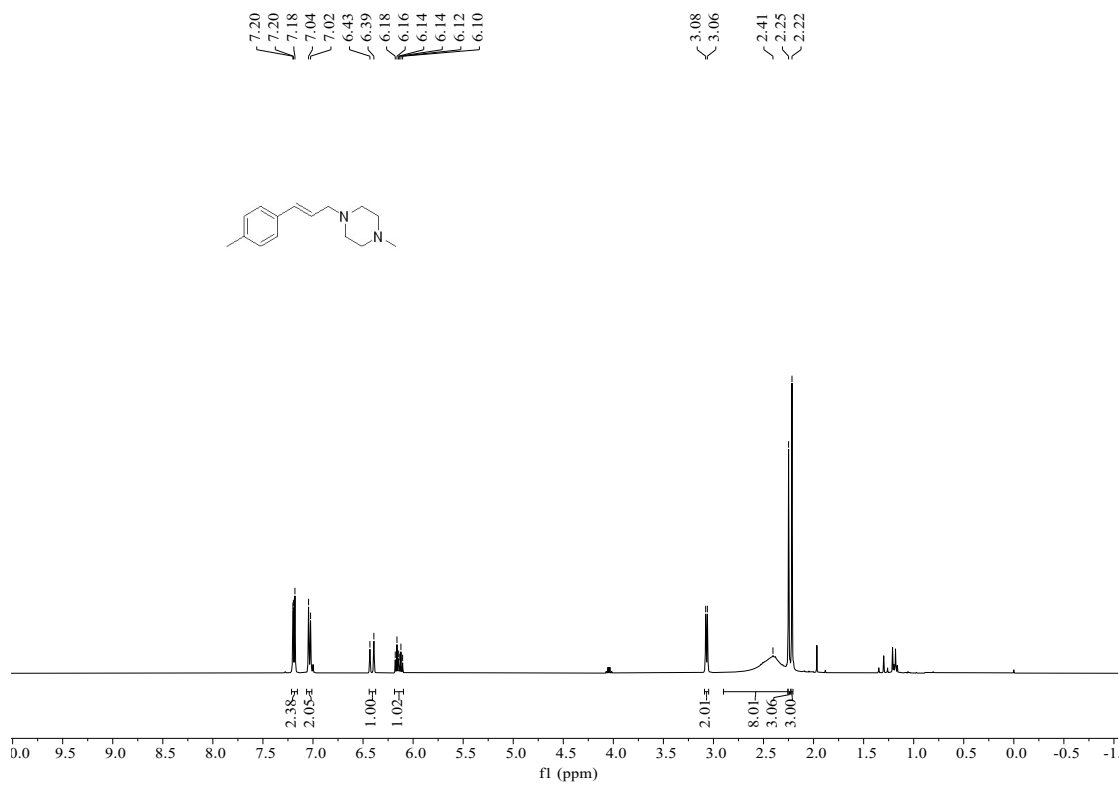

$^1\text{H}$  NMR Spectrum of **3ba** in  $\text{CDCl}_3$  at 400 MHz

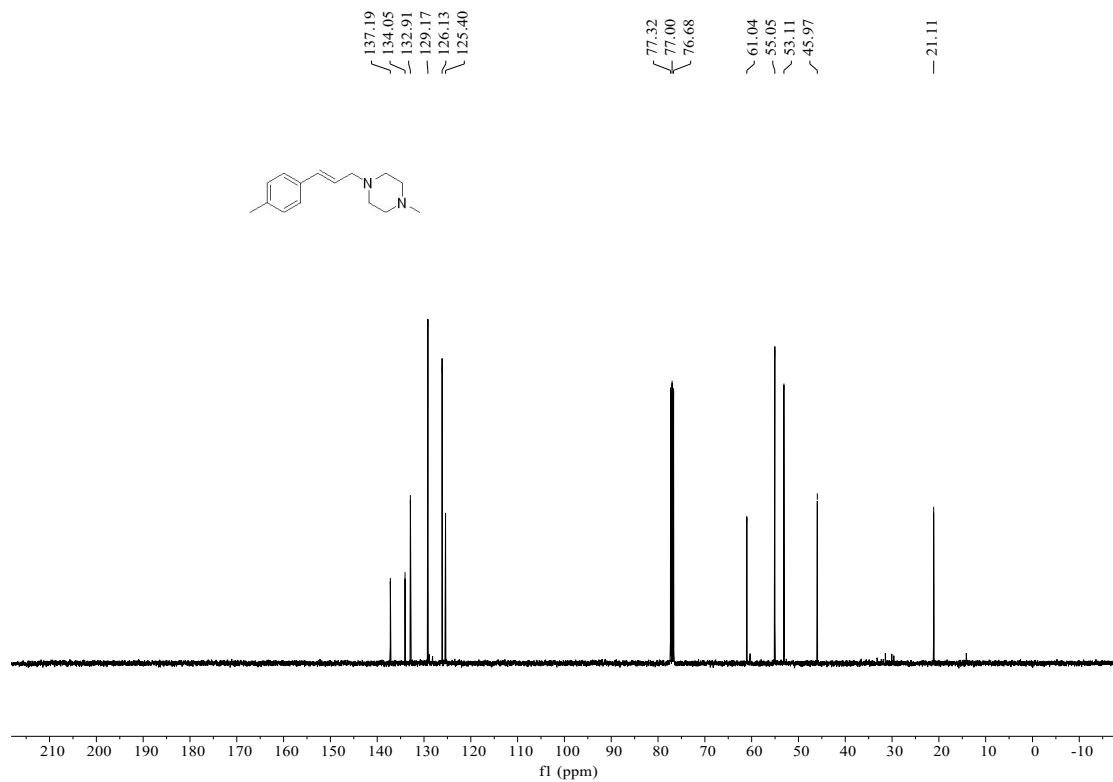

$^{13}\text{C}$  NMR Spectrum of **3ba** in  $\text{CDCl}_3$  at 100 MHz

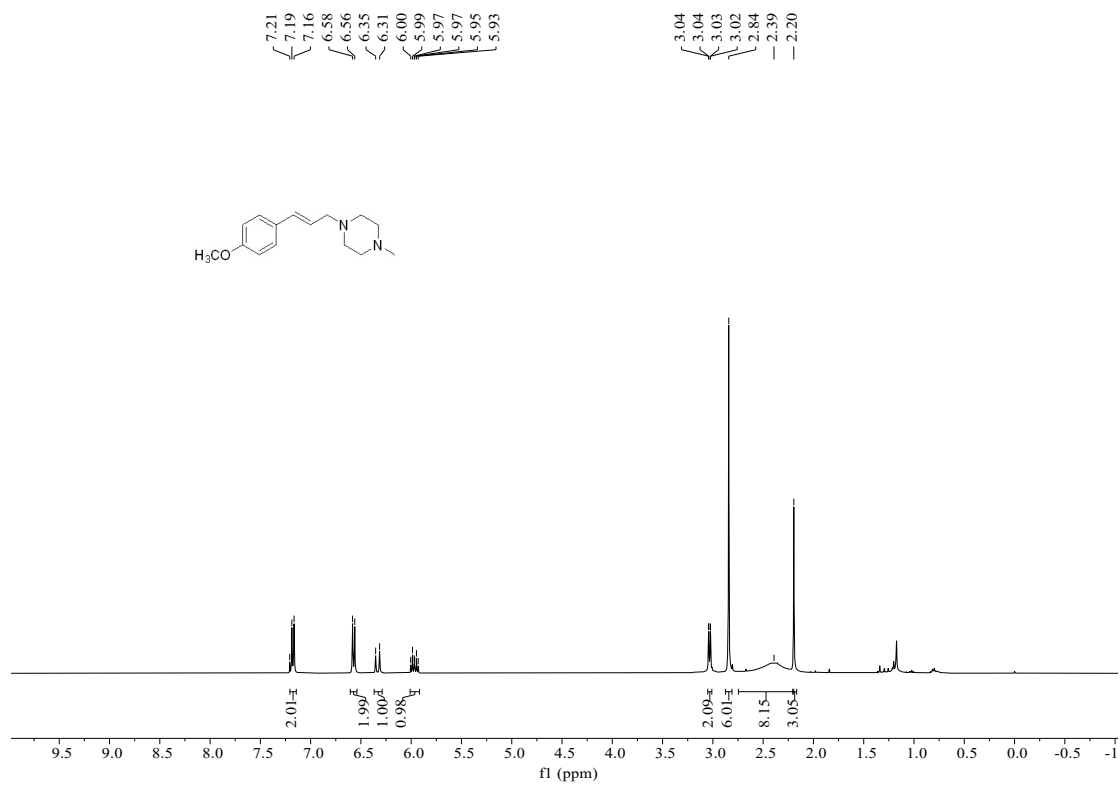

$^1\text{H}$  NMR Spectrum of **3a** in  $\text{CDCl}_3$  at 400 MHz

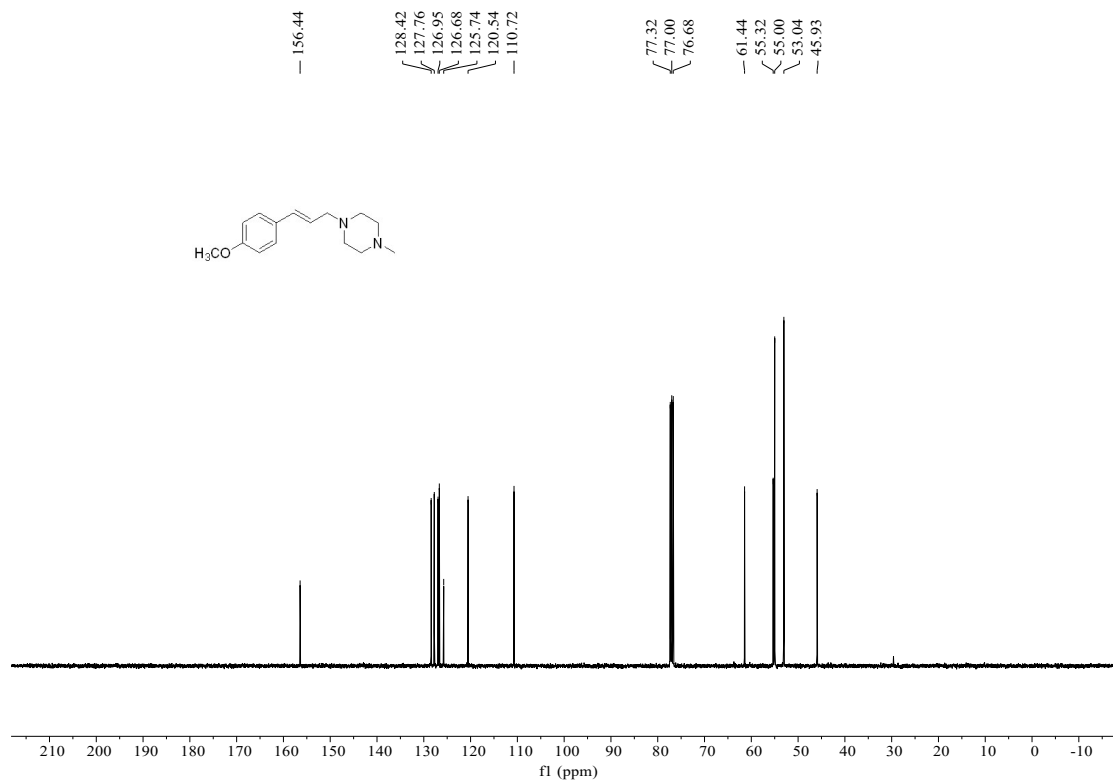

$^{13}\text{C}$  NMR Spectrum of **3a** in  $\text{CDCl}_3$  at 100 MHz

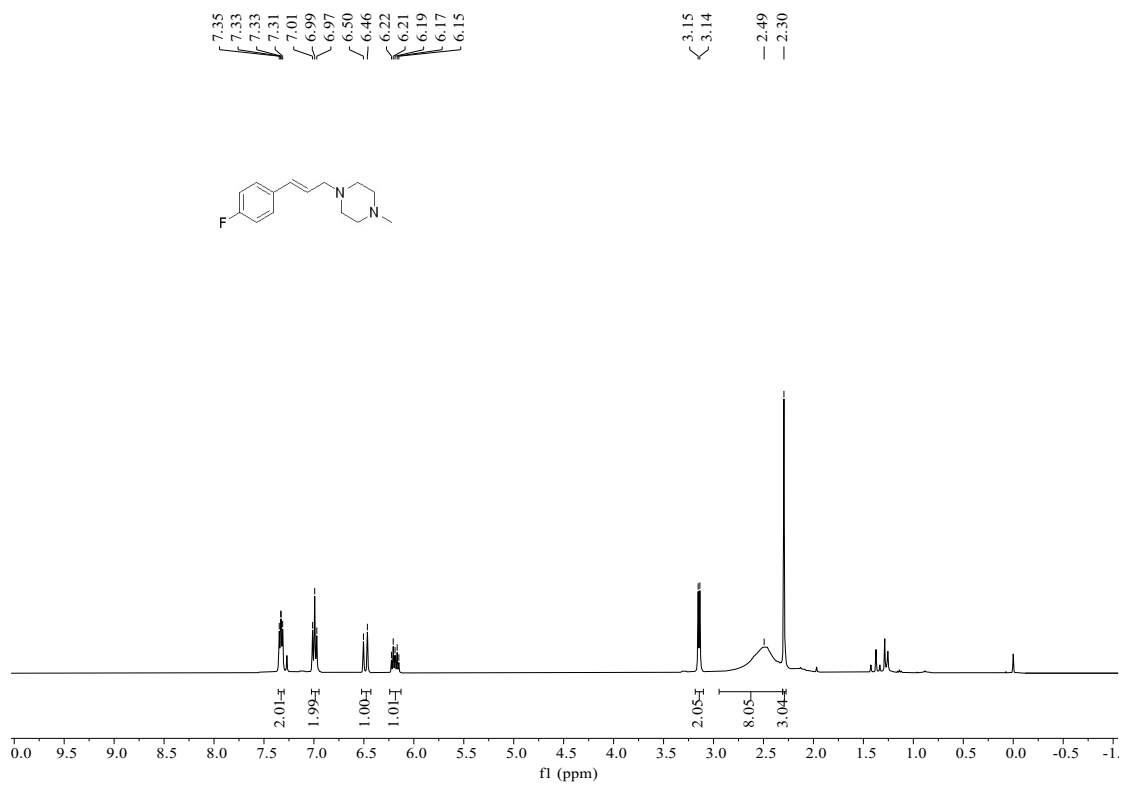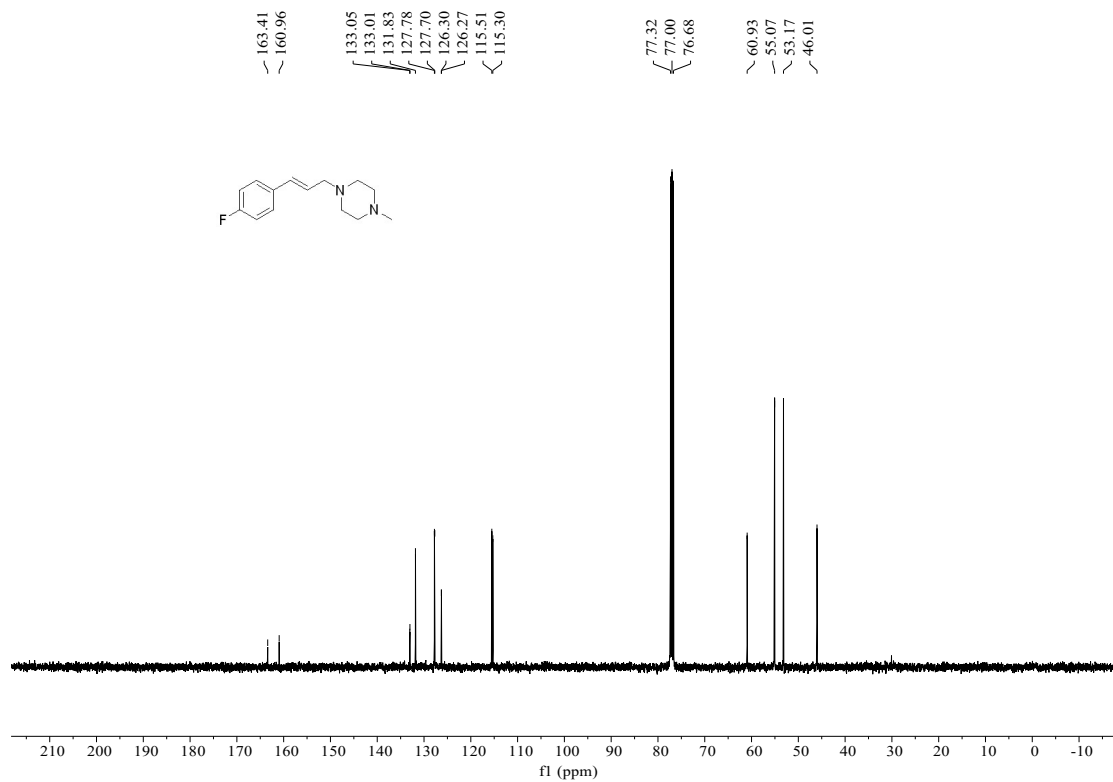



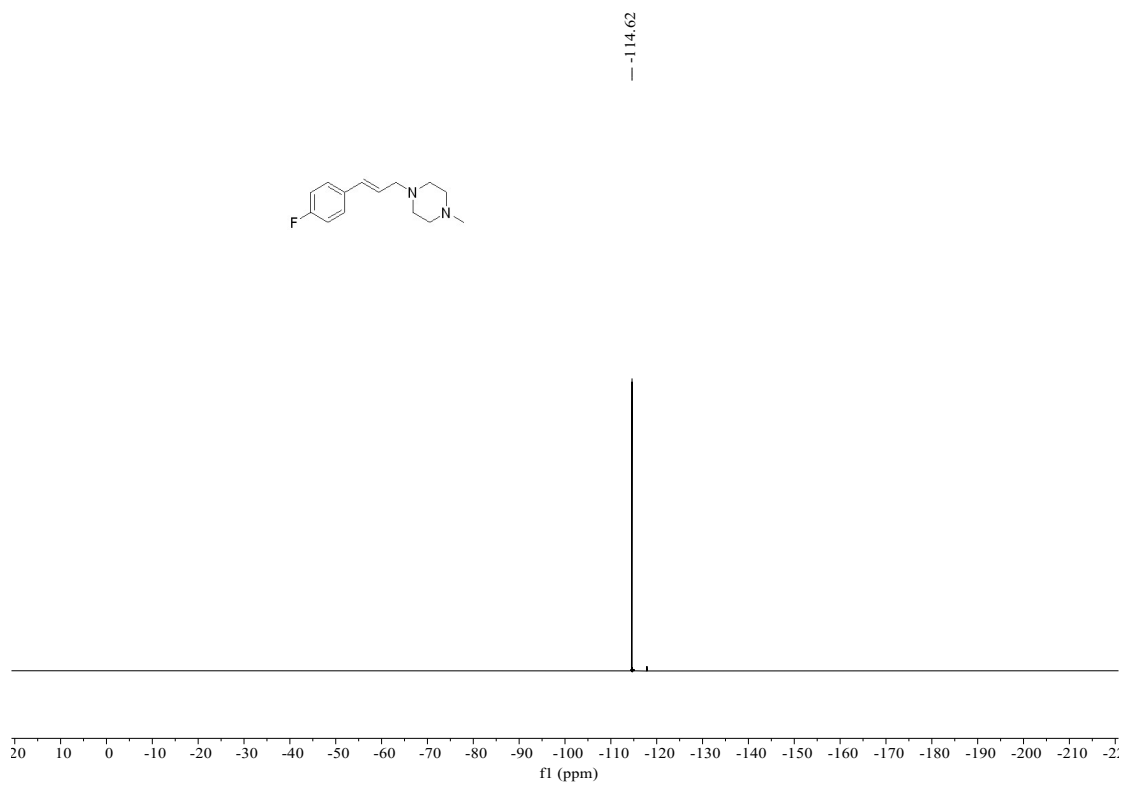

<sup>19</sup>F NMR Spectrum of **3da** in CDCl<sub>3</sub> at 377 MHz

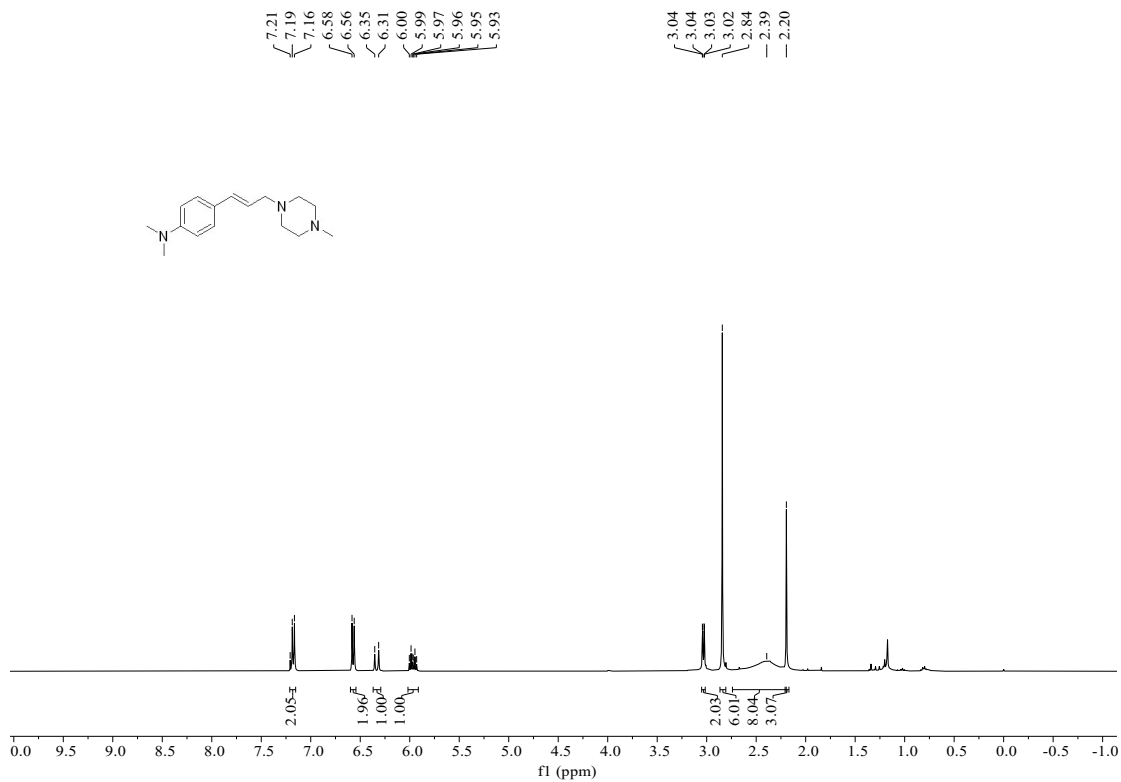

<sup>1</sup>H NMR Spectrum of **3ea** in CDCl<sub>3</sub> at 400 MHz

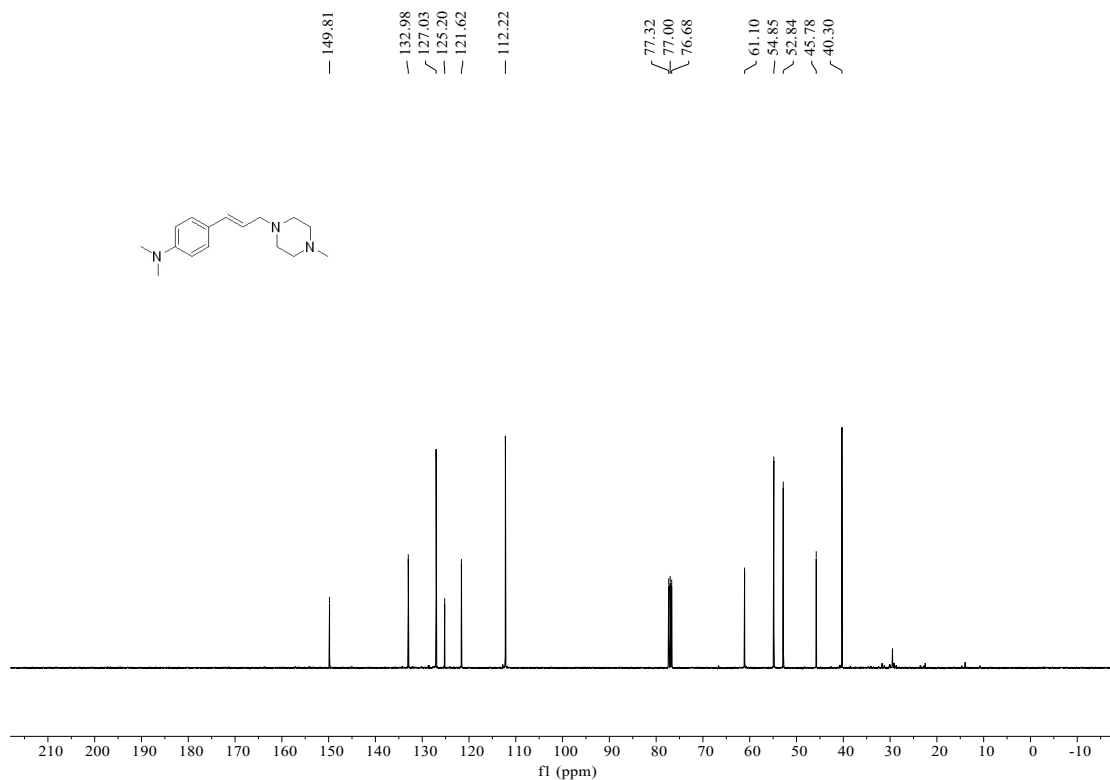

<sup>13</sup>C NMR Spectrum of **3ea** in CDCl<sub>3</sub> at 100 MHz

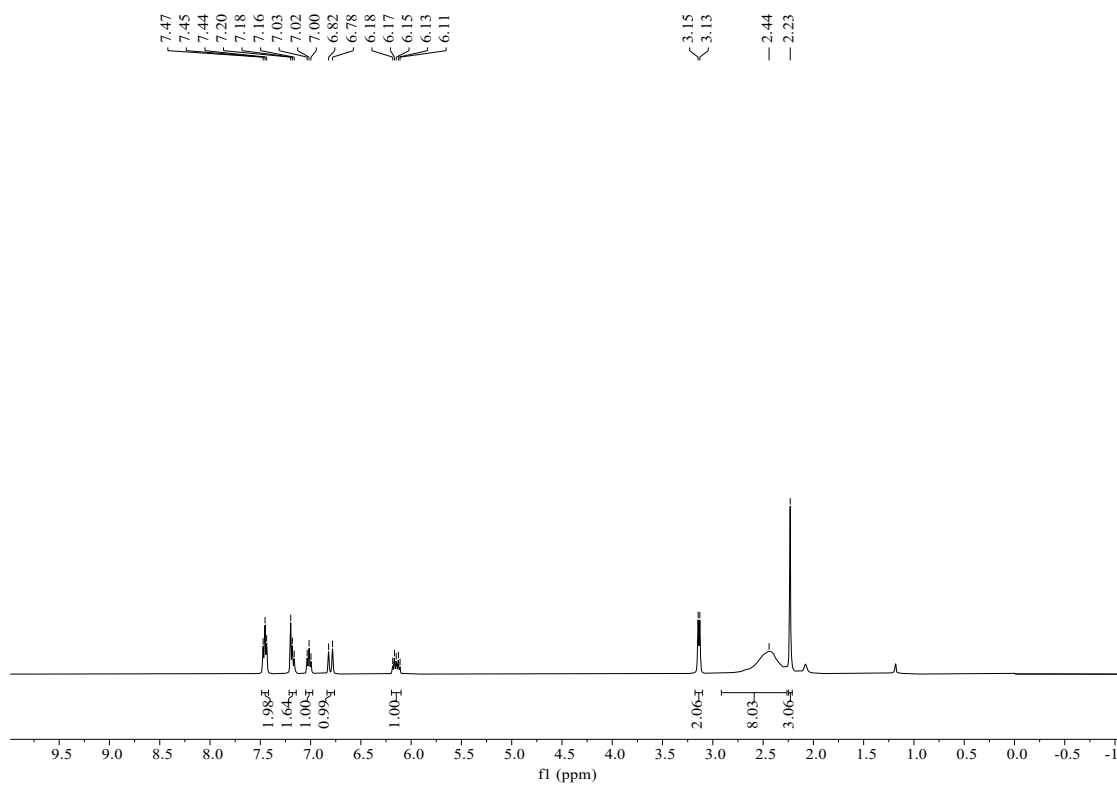

<sup>1</sup>H NMR Spectrum of **3fa** in CDCl<sub>3</sub> at 400 MHz

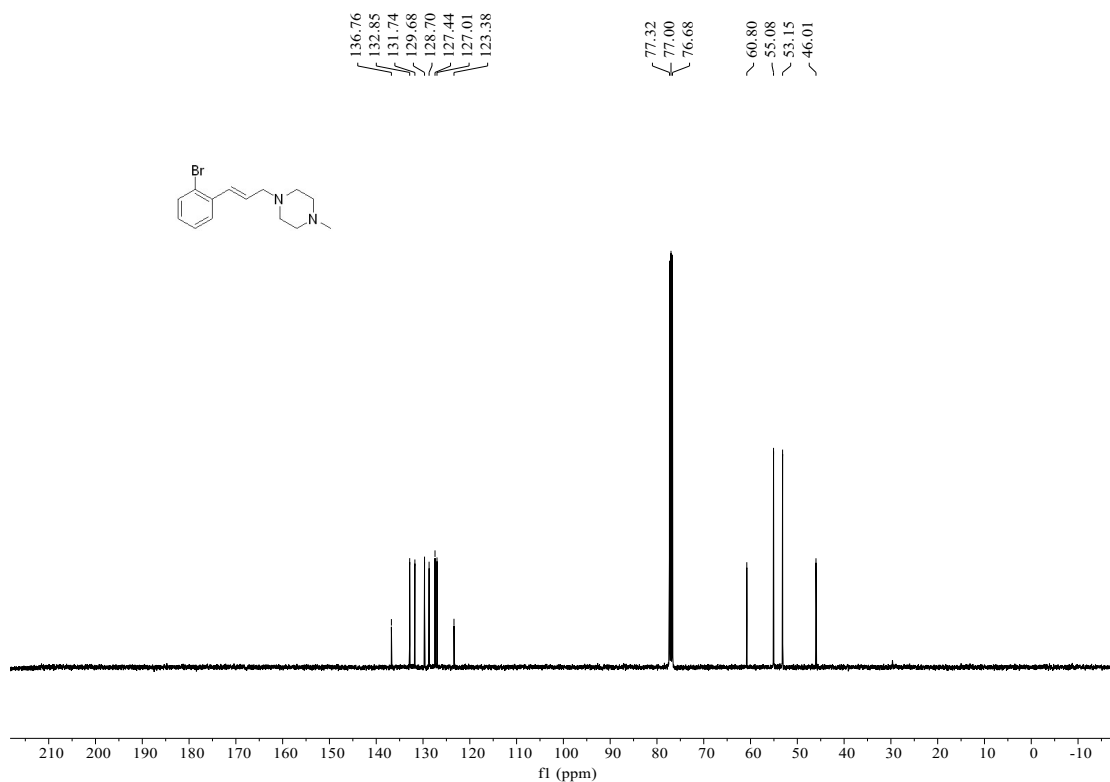

<sup>13</sup>C NMR Spectrum of **3fa** in CDCl<sub>3</sub> at 100 MHz

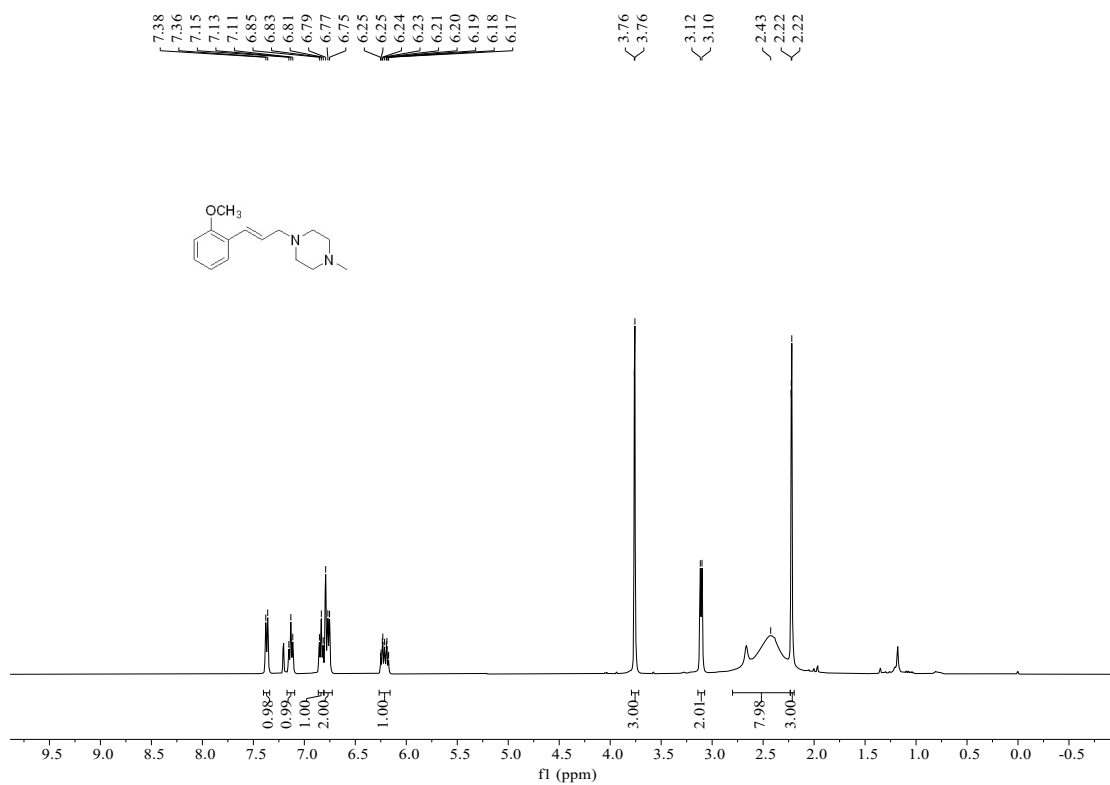

<sup>1</sup>H NMR Spectrum of **3ga** in CDCl<sub>3</sub> at 400 MHz

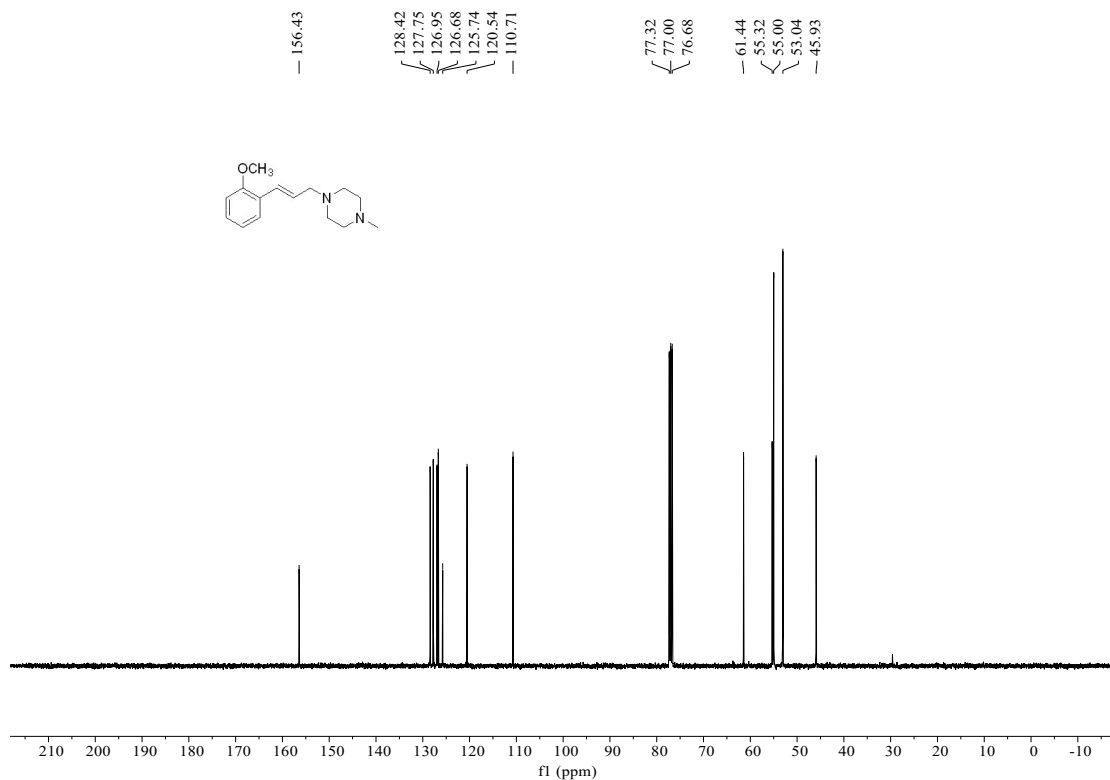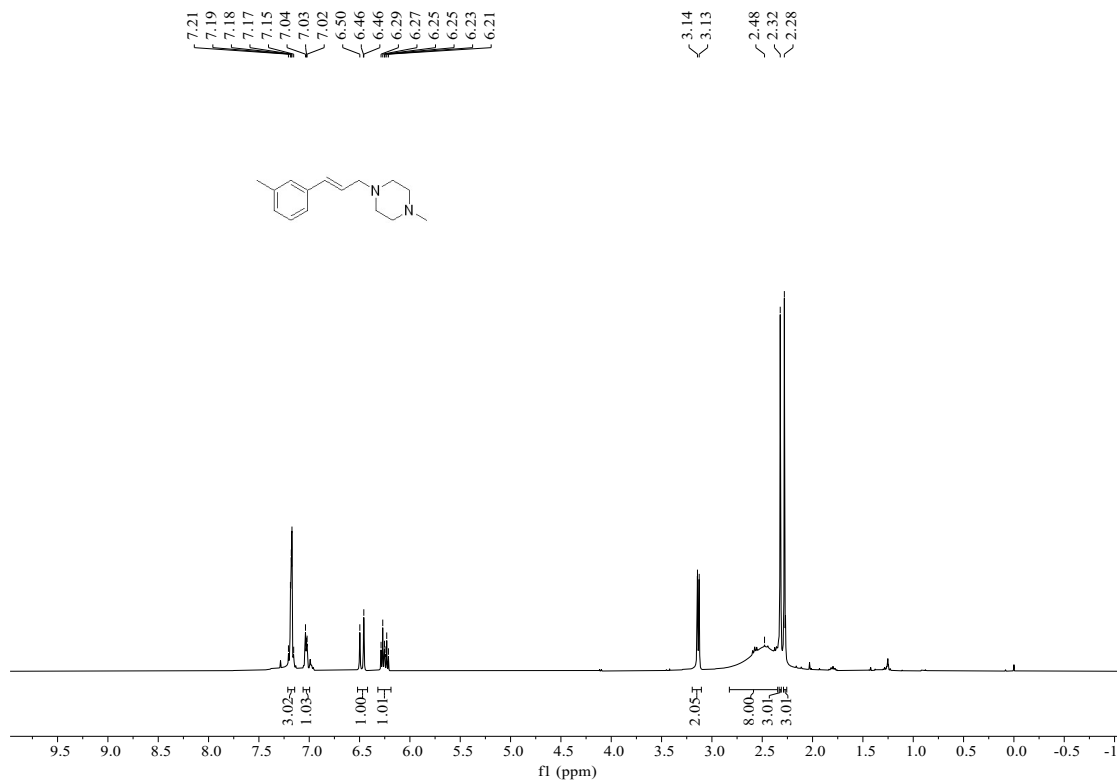

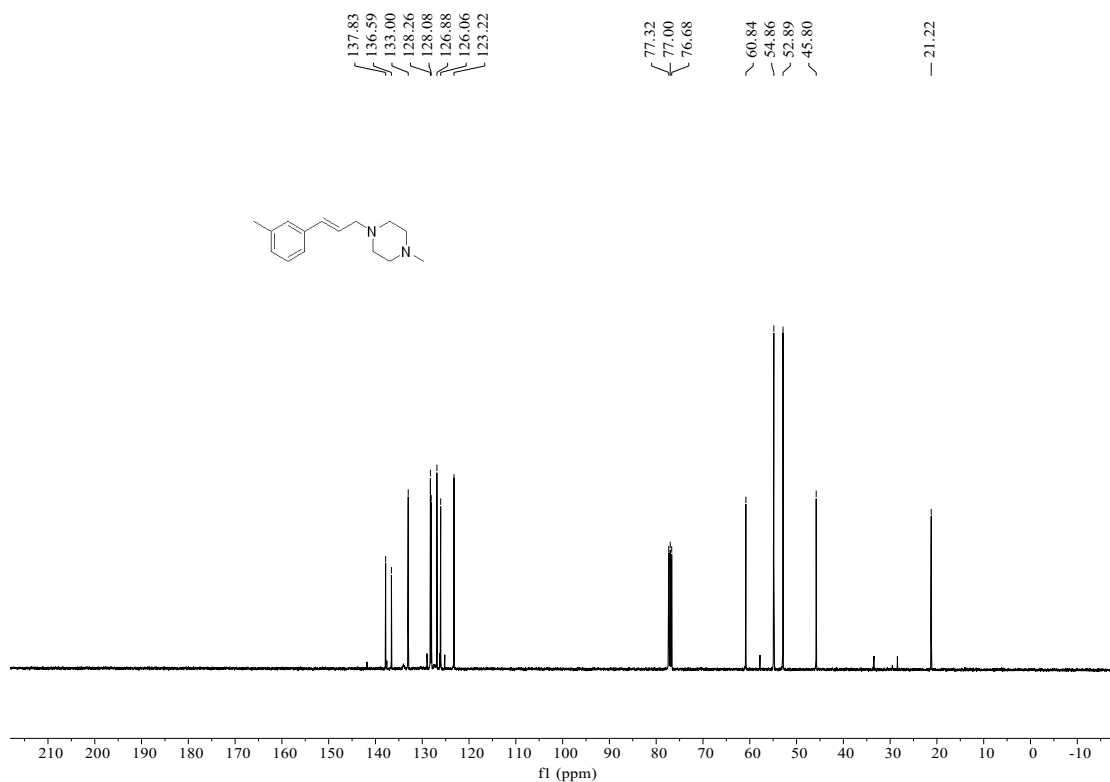

$^{13}\text{C}$  NMR Spectrum of **3ha** in  $\text{CDCl}_3$  at 100 MHz

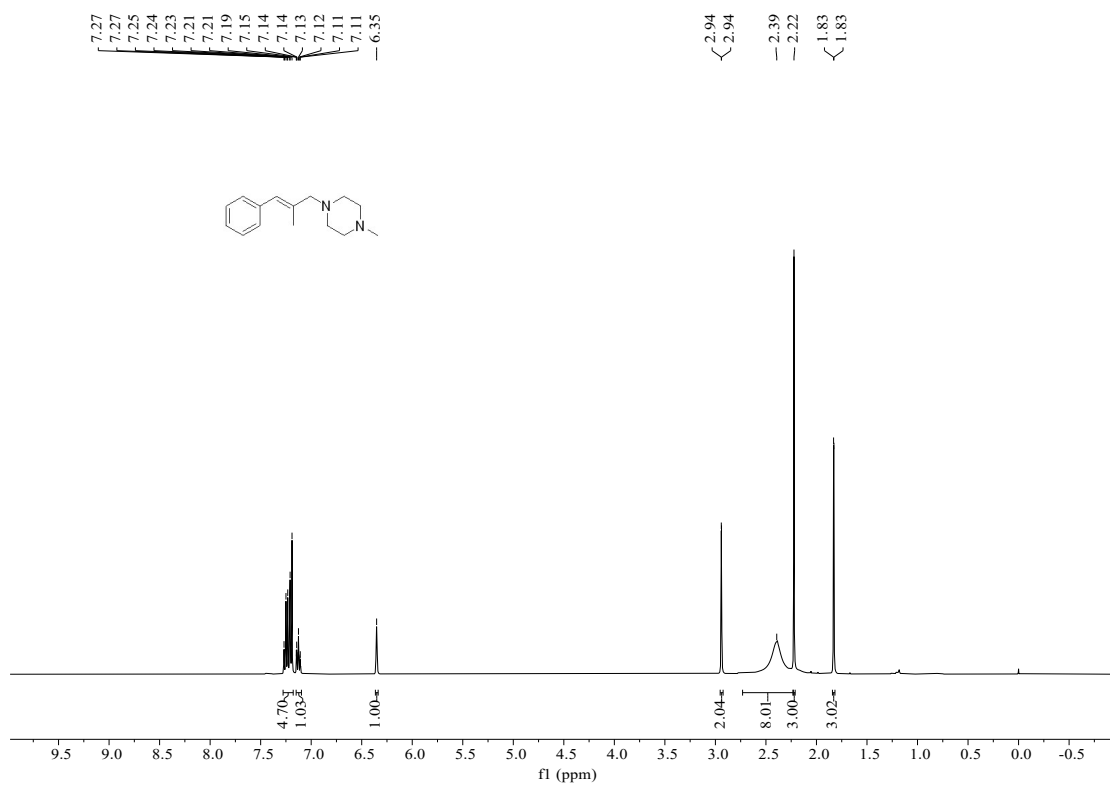

$^1\text{H}$  NMR Spectrum of **3ia** in  $\text{CDCl}_3$  at 400 MHz

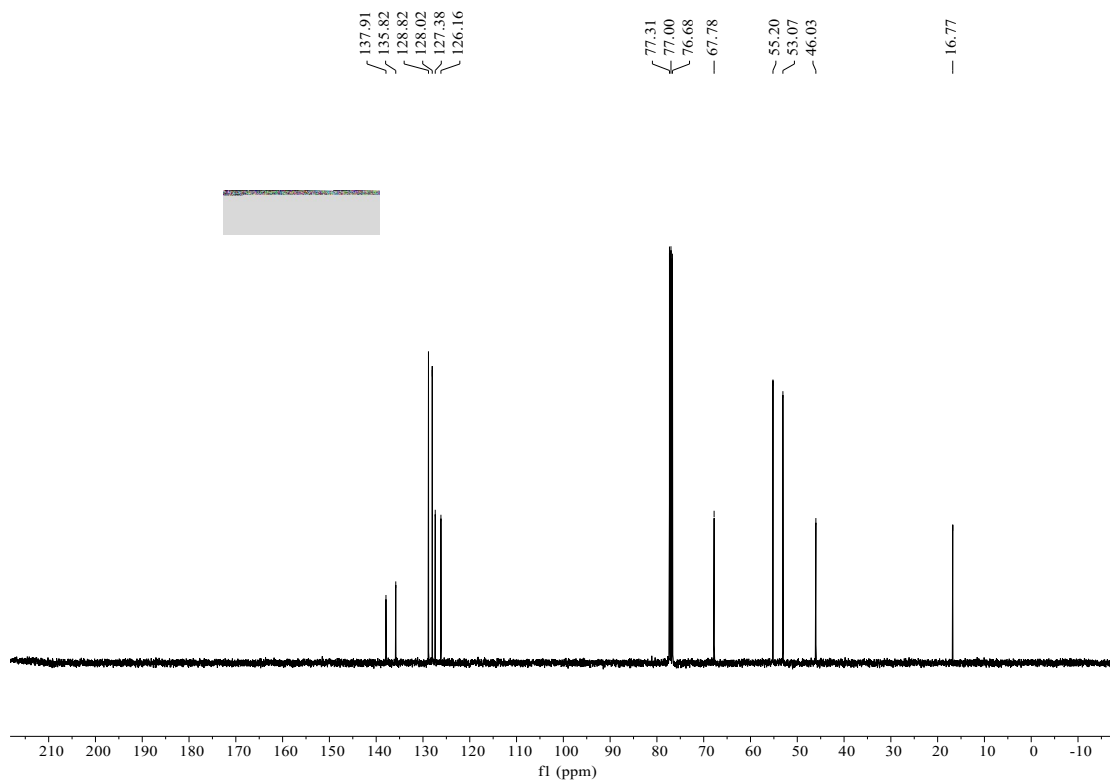

<sup>13</sup>C NMR Spectrum of **3ia** in CDCl<sub>3</sub> at 100 MHz

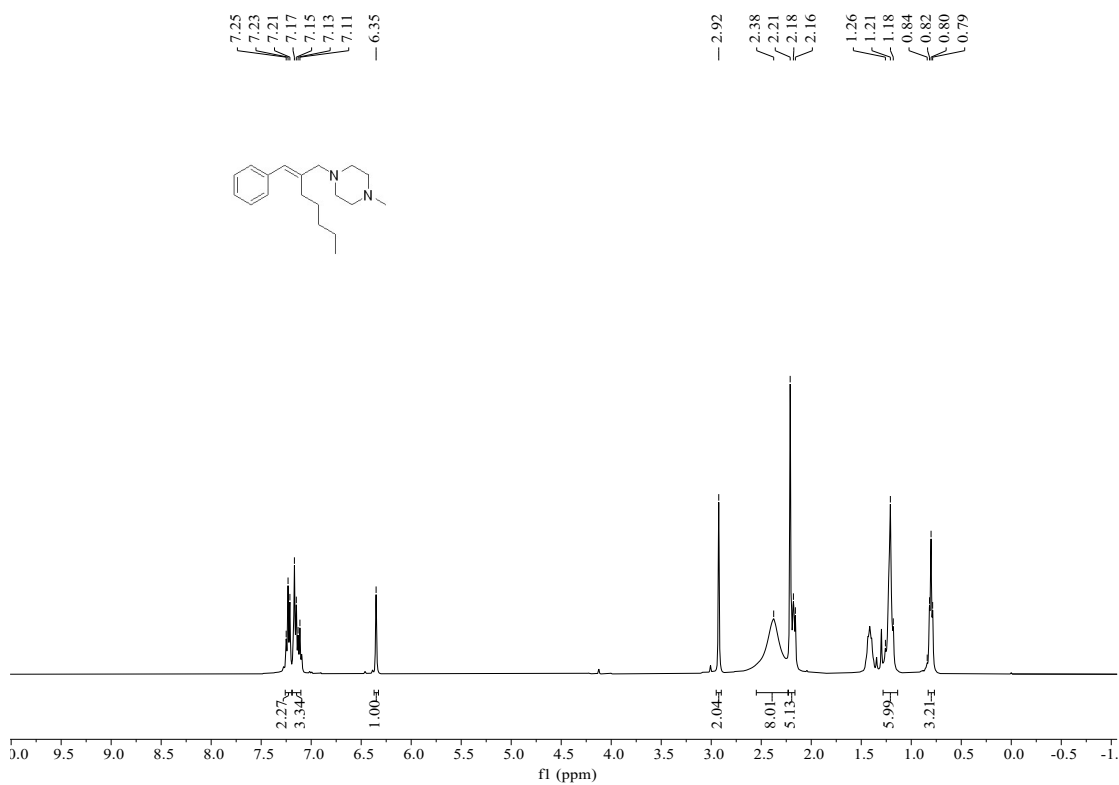

<sup>1</sup>H NMR Spectrum of **3ja** in CDCl<sub>3</sub> at 400 MHz

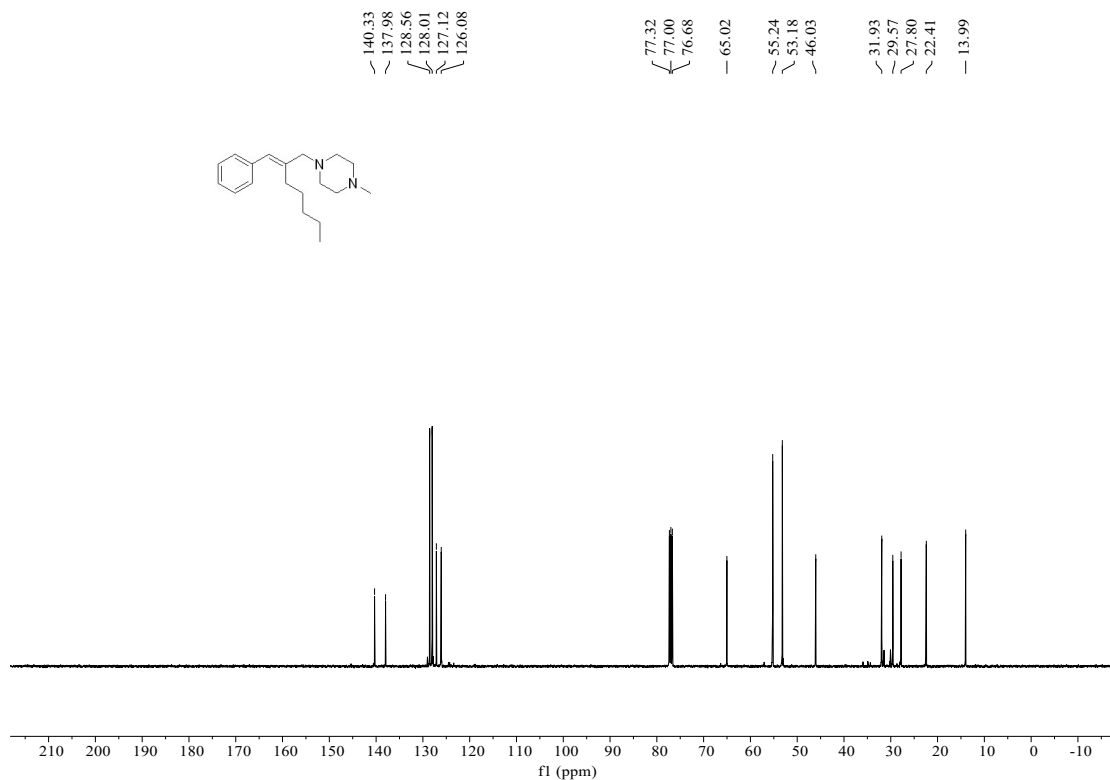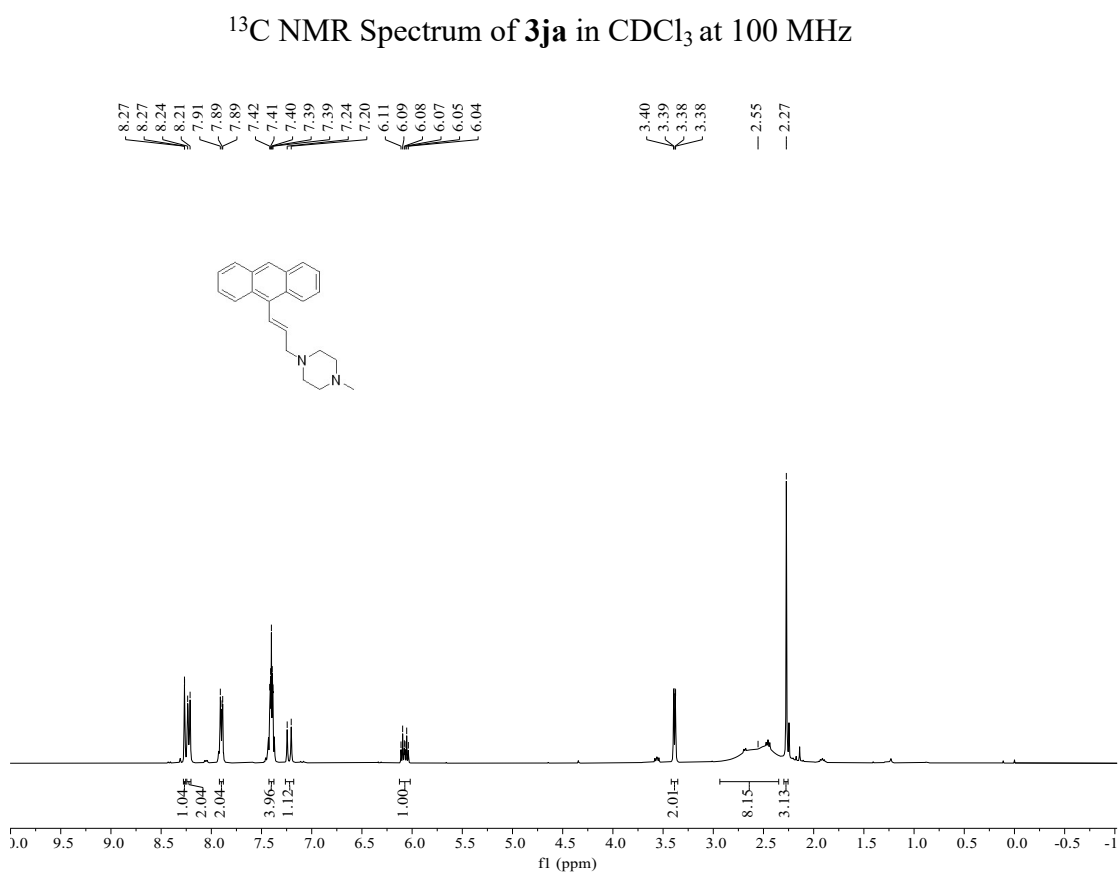

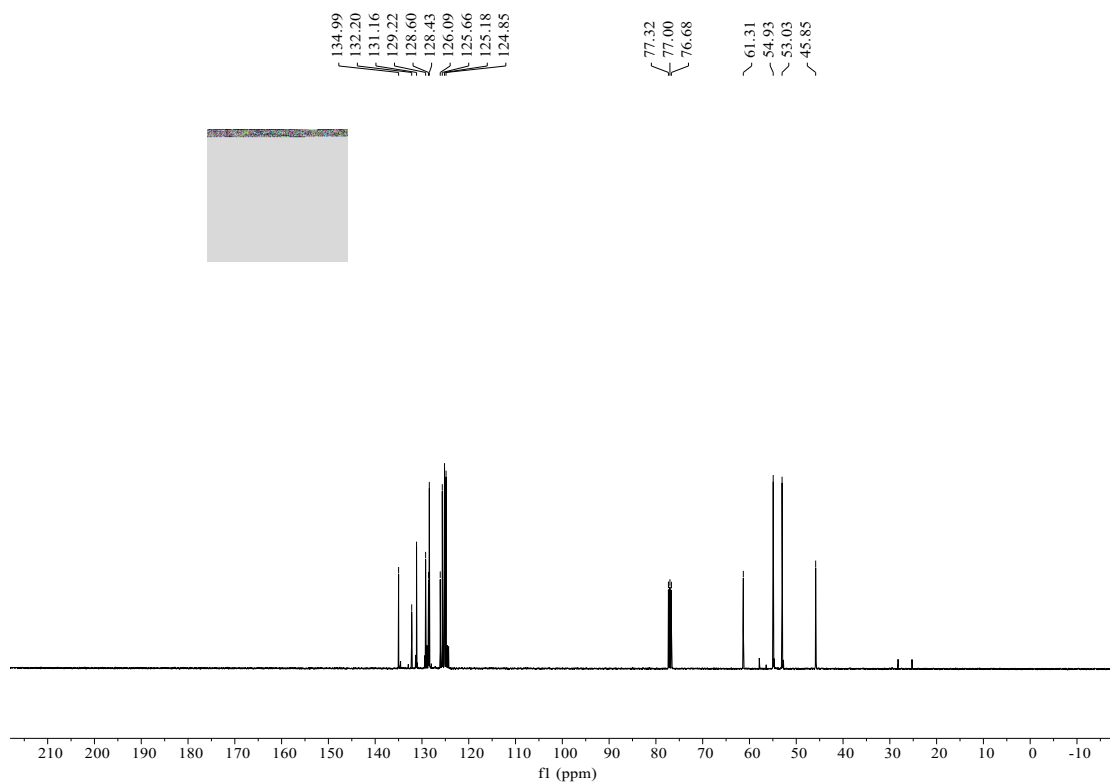

$^{13}\text{C}$  NMR Spectrum of **3ka** in  $\text{CDCl}_3$  at 100 MHz

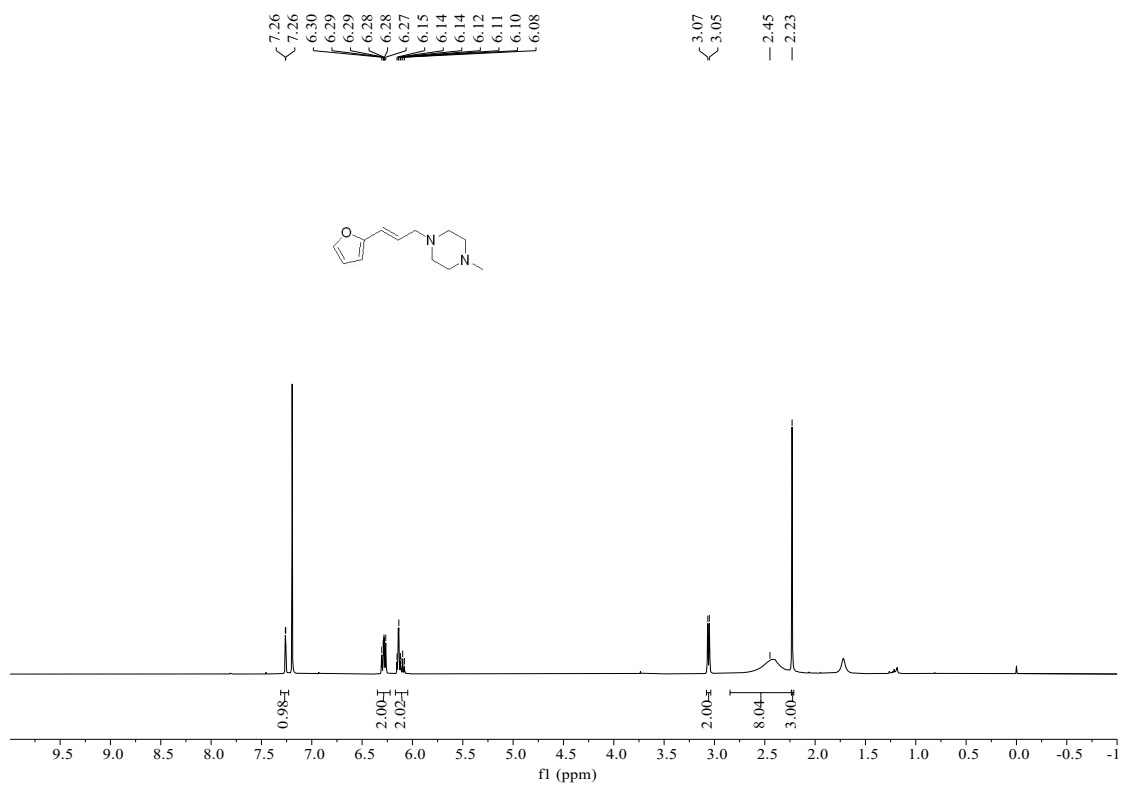

$^1\text{H}$  NMR Spectrum of **3la** in  $\text{CDCl}_3$  at 400 MHz



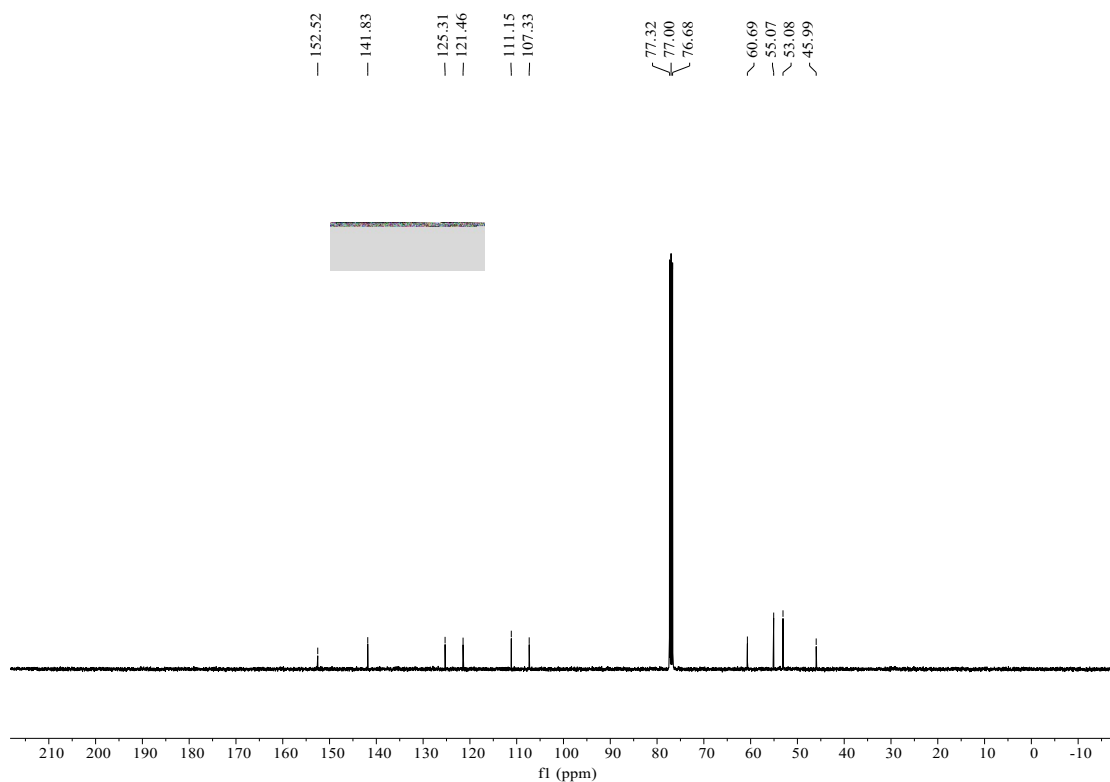

<sup>13</sup>C NMR Spectrum of **3la** in CDCl<sub>3</sub> at 100 MHz

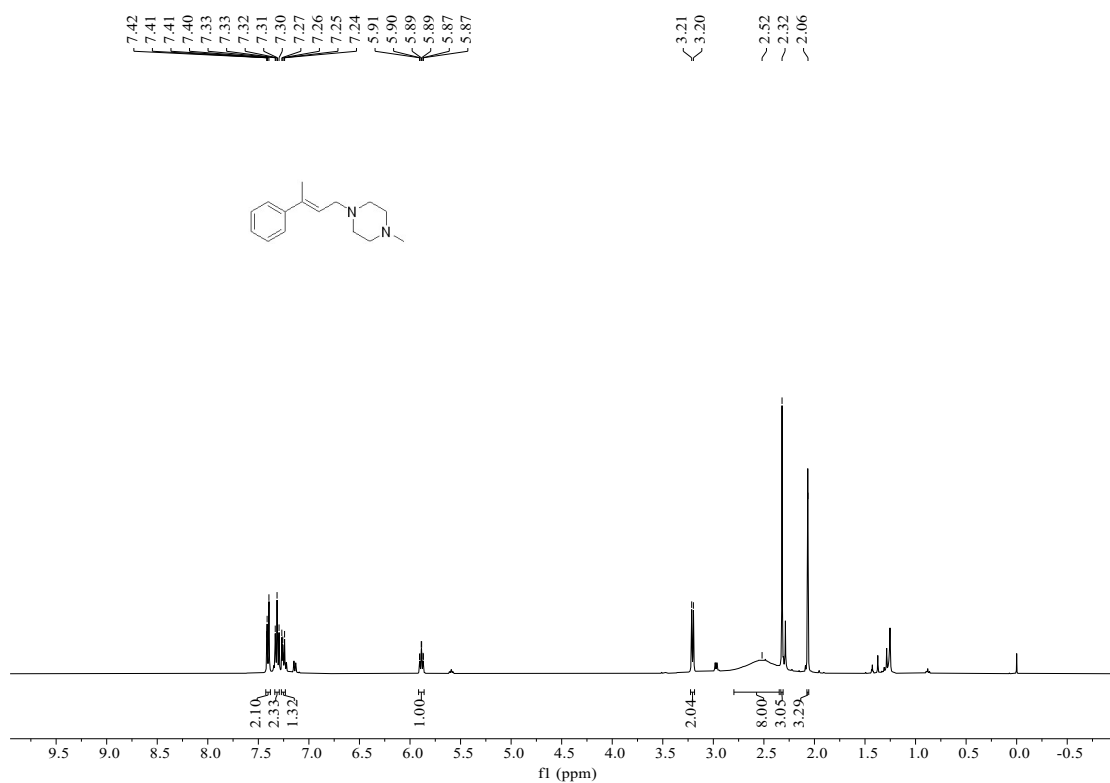

<sup>1</sup>H NMR Spectrum of **3ma** in CDCl<sub>3</sub> at 400 MHz

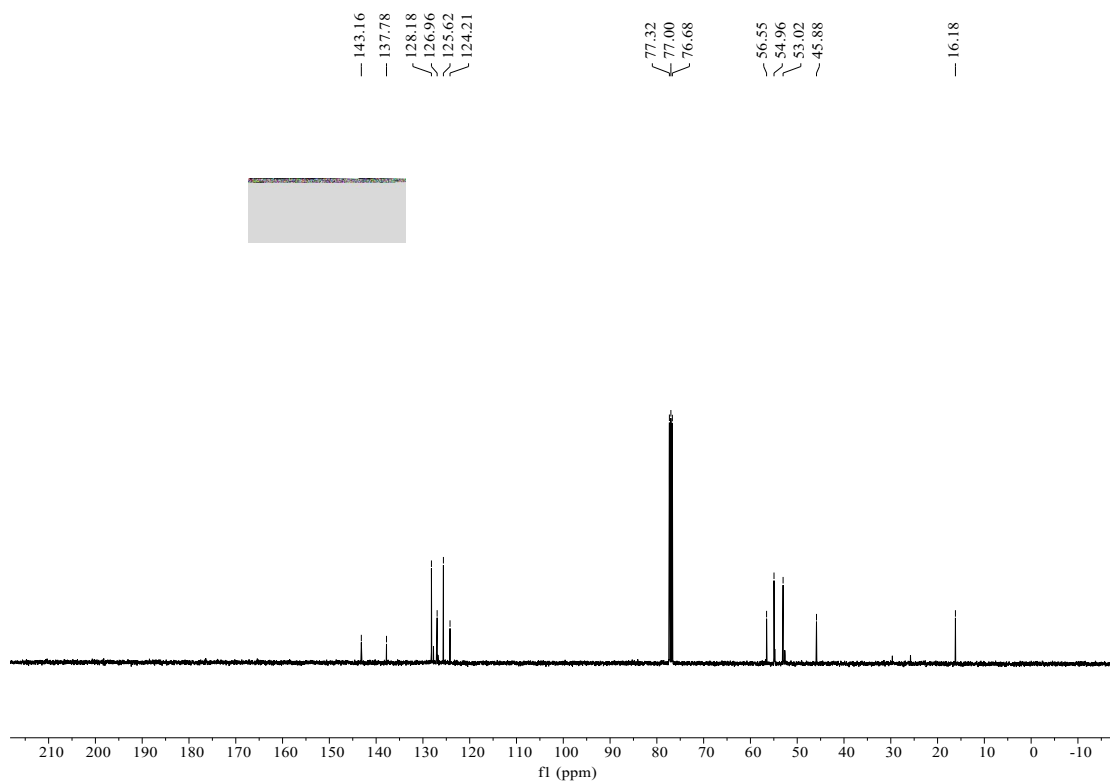

<sup>13</sup>C NMR Spectrum of **3ma** in CDCl<sub>3</sub> at 100 MHz

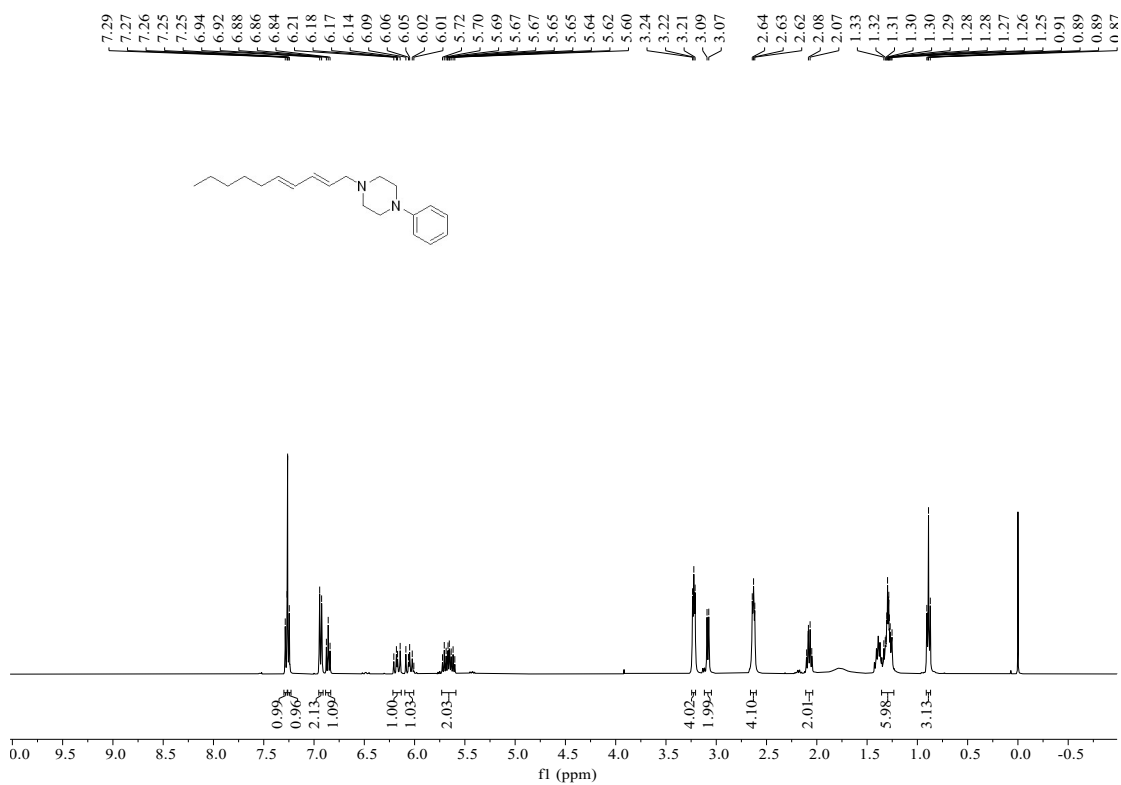

<sup>1</sup>H NMR Spectrum of **3nb** in CDCl<sub>3</sub> at 400 MHz

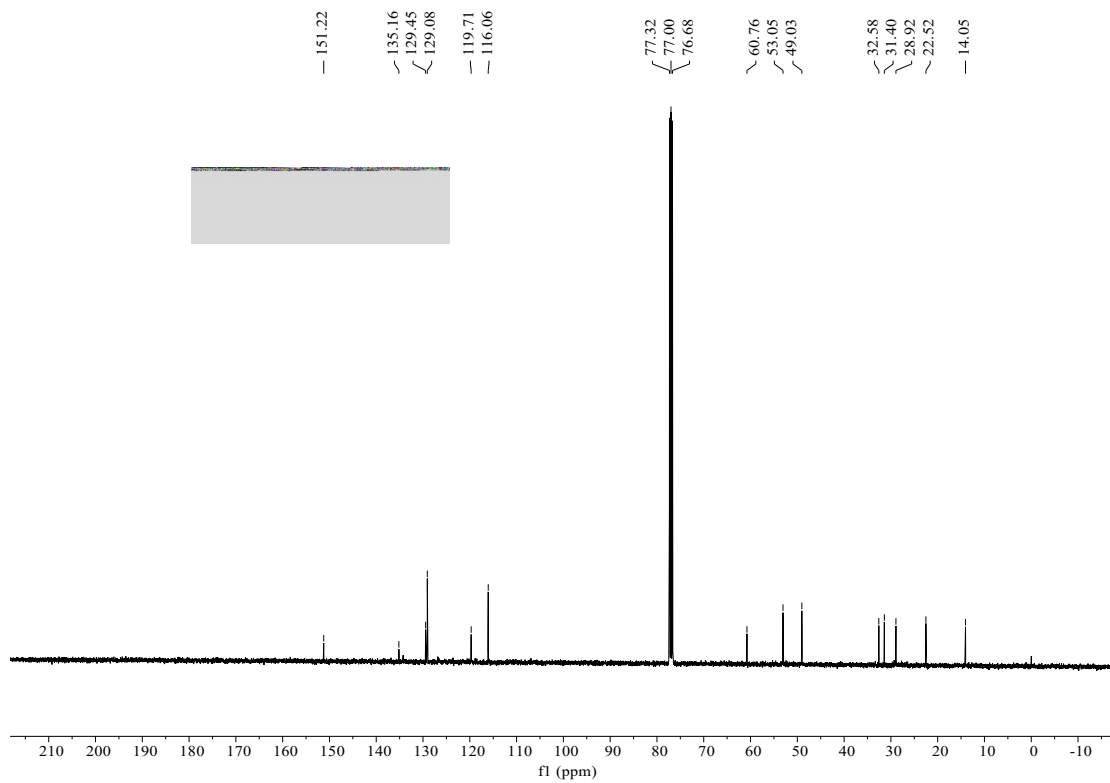

$^{13}\text{C}$  NMR Spectrum of **3nb** in  $\text{CDCl}_3$  at 100 MHz

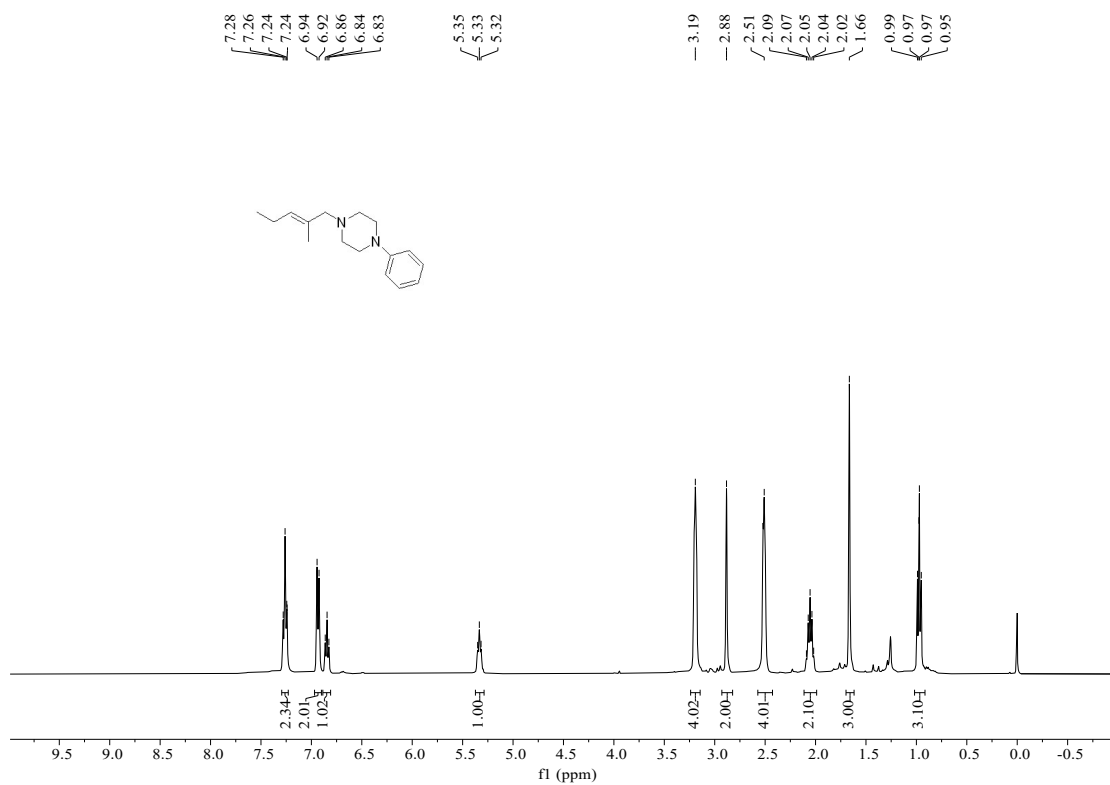

$^1\text{H}$  NMR Spectrum of **3ob** in  $\text{CDCl}_3$  at 400 MHz

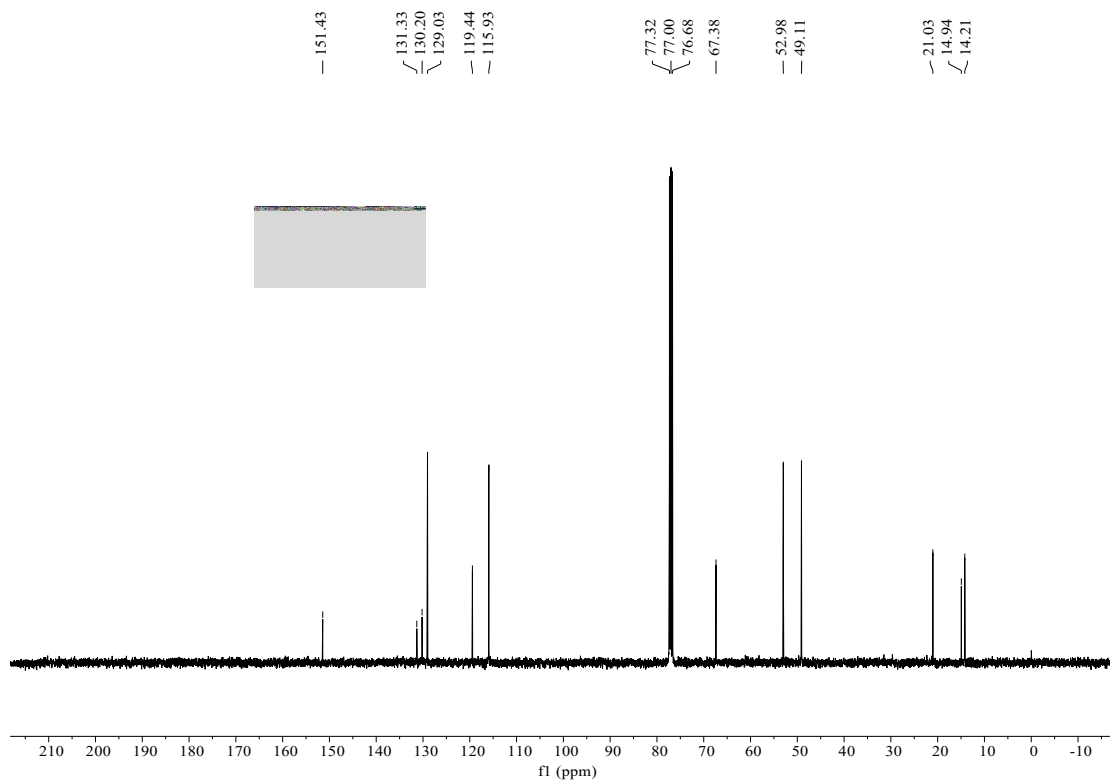

$^{13}\text{C}$  NMR Spectrum of **3ob** in  $\text{CDCl}_3$  at 100 MHz

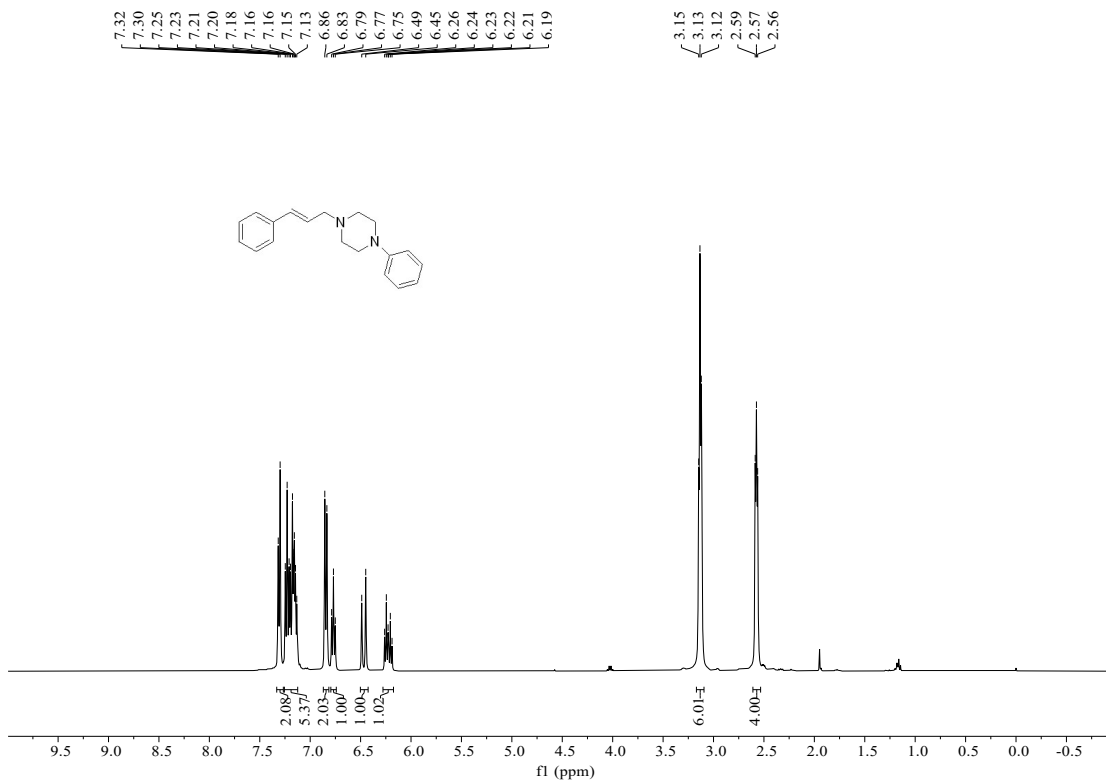

$^1\text{H}$  NMR Spectrum of **3ab** in  $\text{CDCl}_3$  at 400 MHz

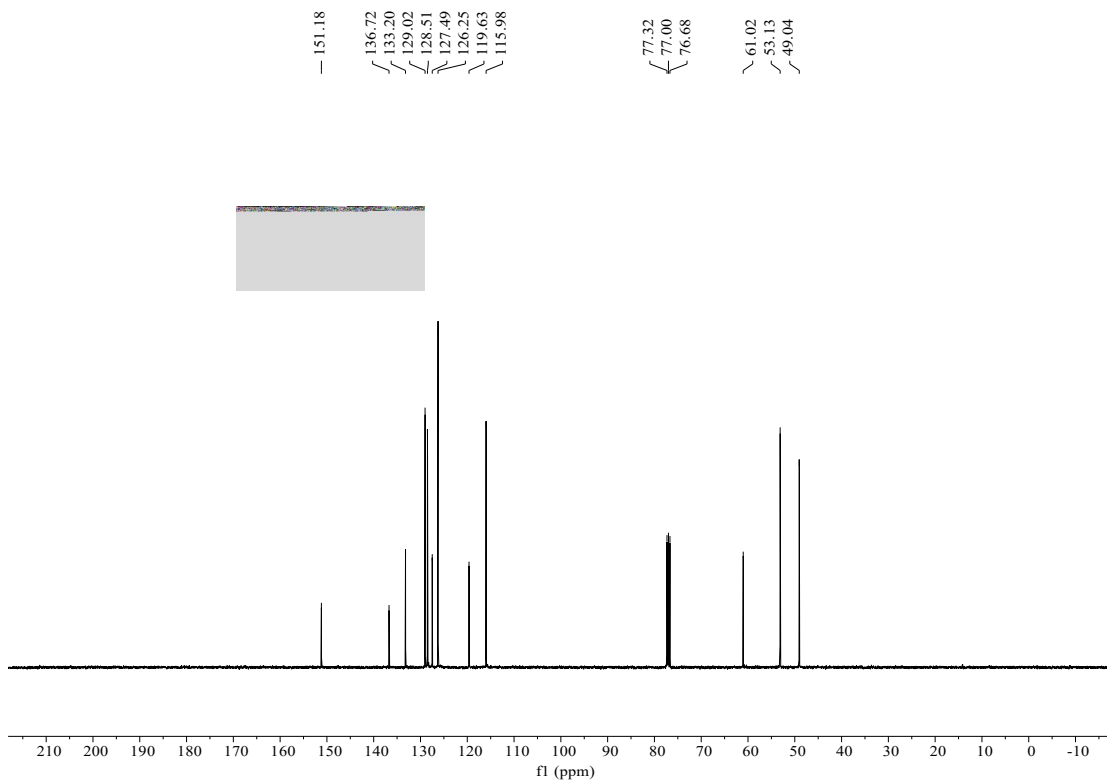

$^{13}\text{C}$  NMR Spectrum of **3ab** in  $\text{CDCl}_3$  at 100 MHz

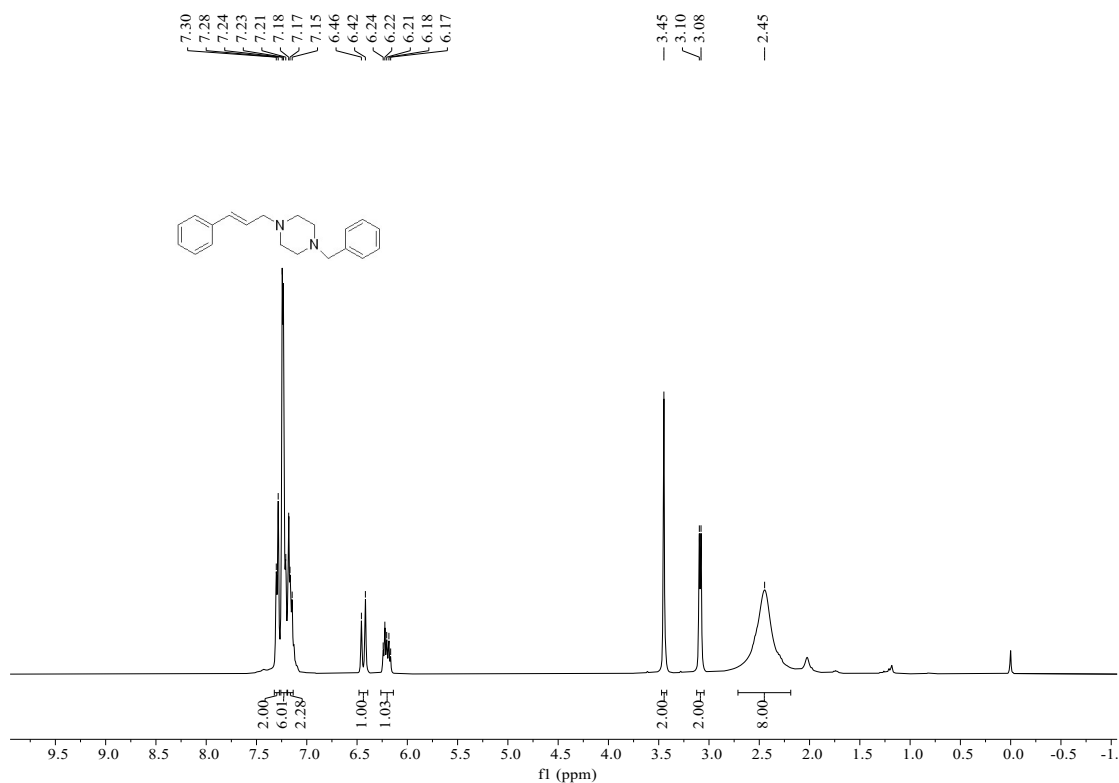

$^1\text{H}$  NMR Spectrum of **3ac** in  $\text{CDCl}_3$  at 400 MHz

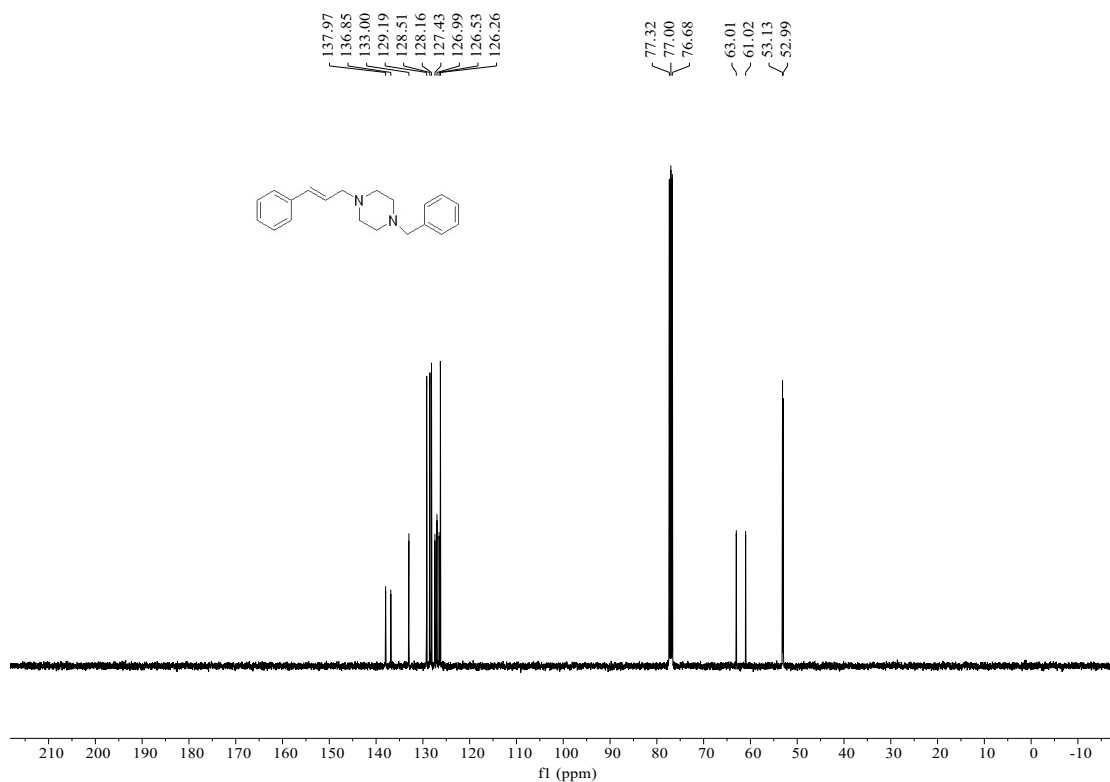

$^{13}\text{C}$  NMR Spectrum of **3ac** in  $\text{CDCl}_3$  at 100 MHz

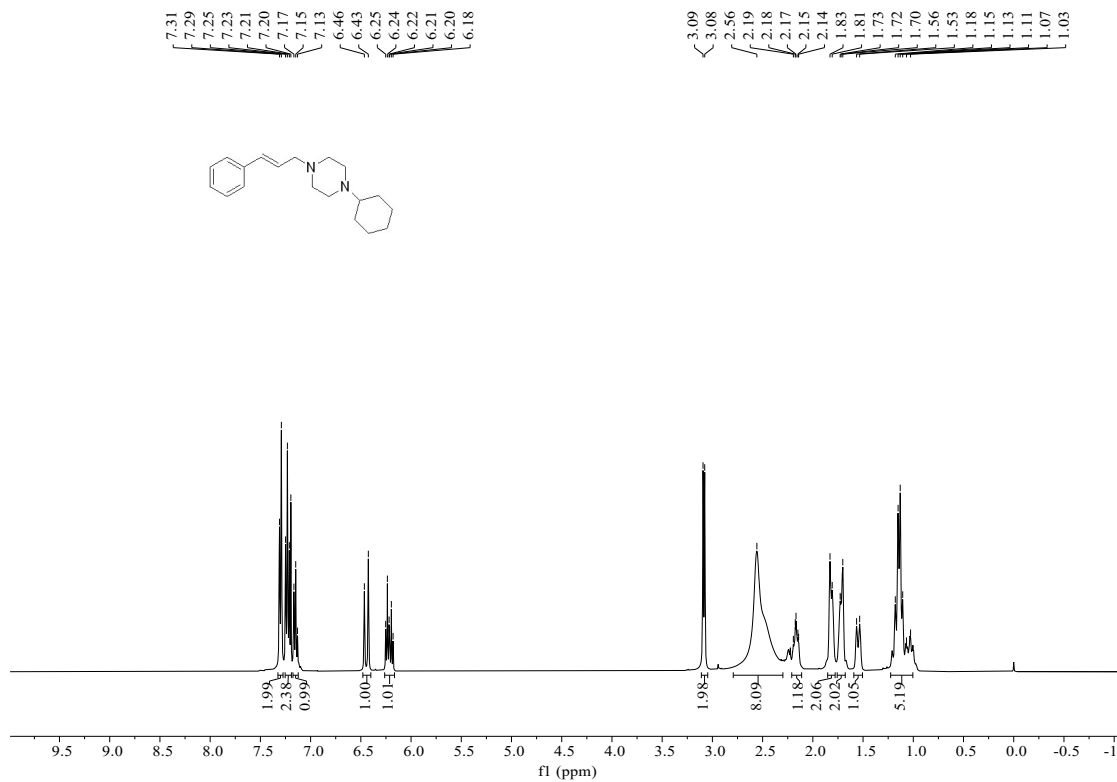

$^1\text{H}$  NMR Spectrum of **3ad** in  $\text{CDCl}_3$  at 400 MHz

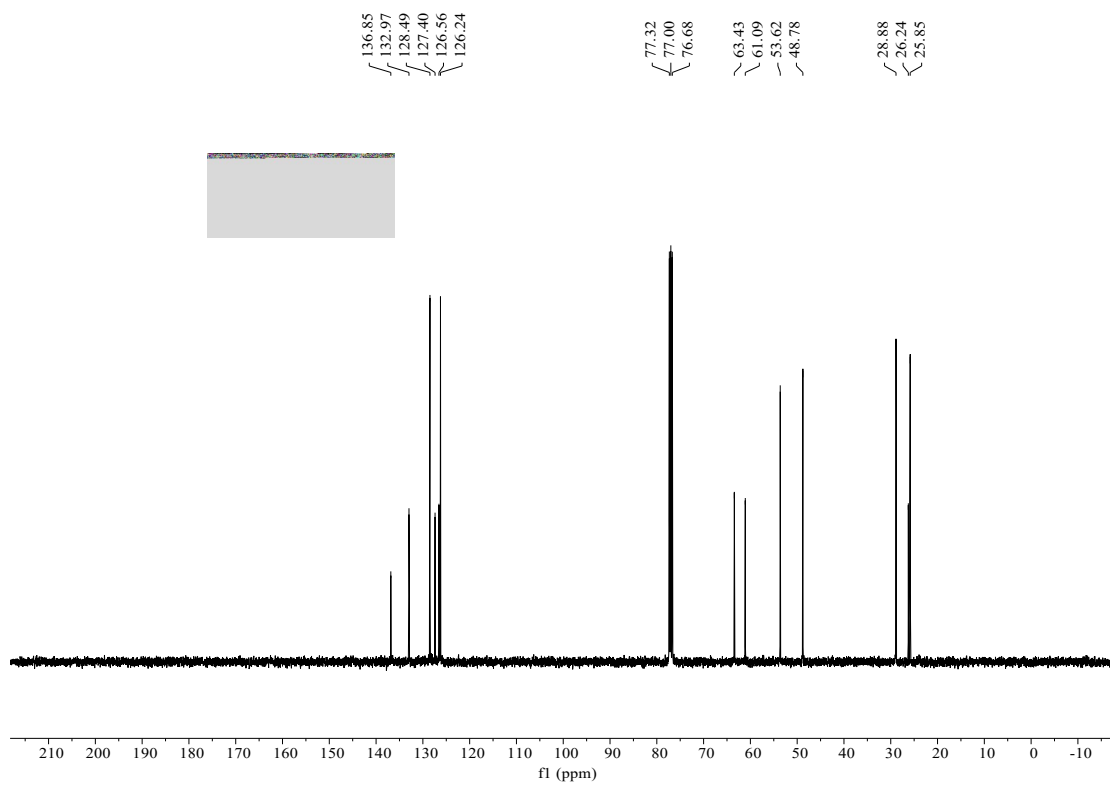

$^{13}\text{C}$  NMR Spectrum of **3ad** in  $\text{CDCl}_3$  at 100 MHz

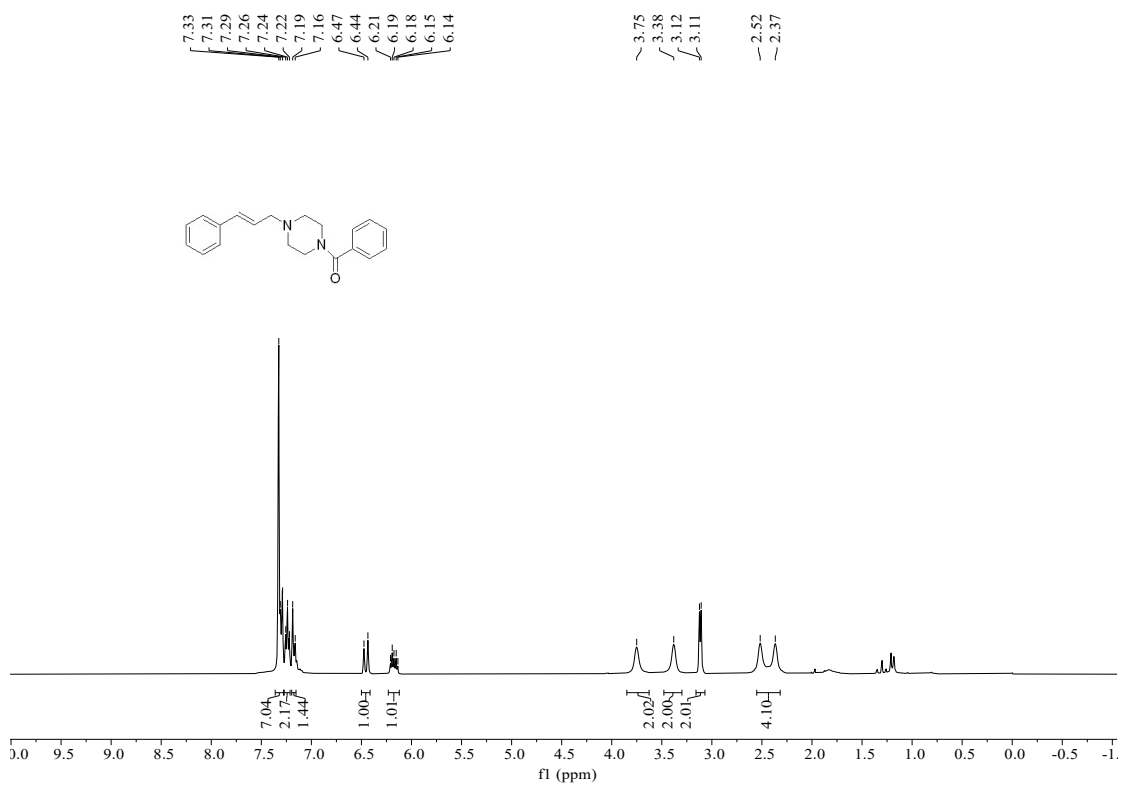

$^1\text{H}$  NMR Spectrum of **3ae** in  $\text{CDCl}_3$  at 400 MHz

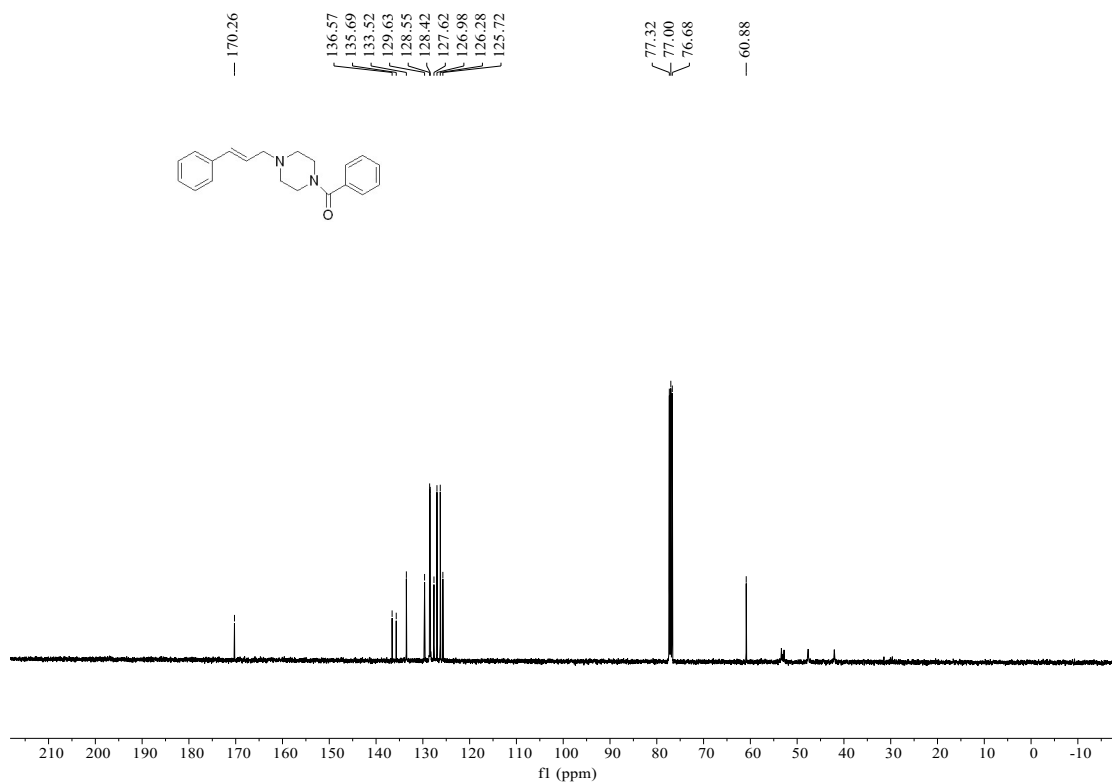

$^{13}\text{C}$  NMR Spectrum of **3ae** in  $\text{CDCl}_3$  at 100 MHz

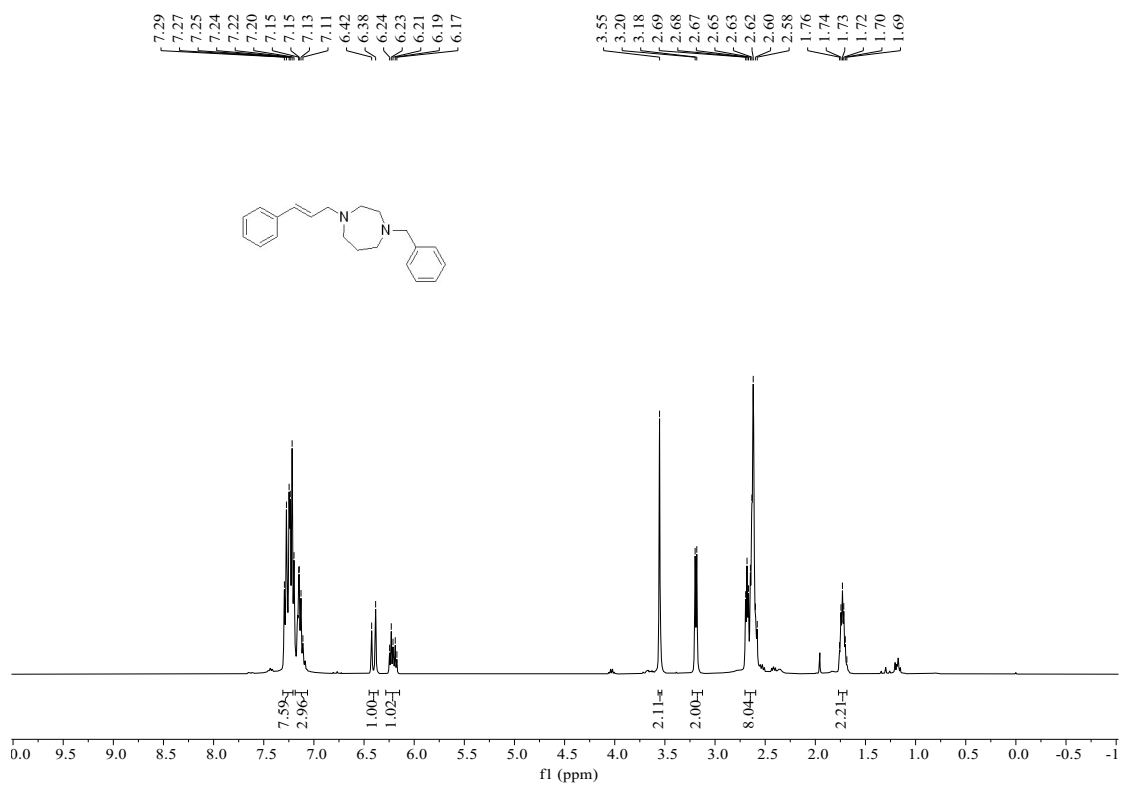

$^1\text{H}$  NMR Spectrum of **3af** in  $\text{CDCl}_3$  at 400 MHz



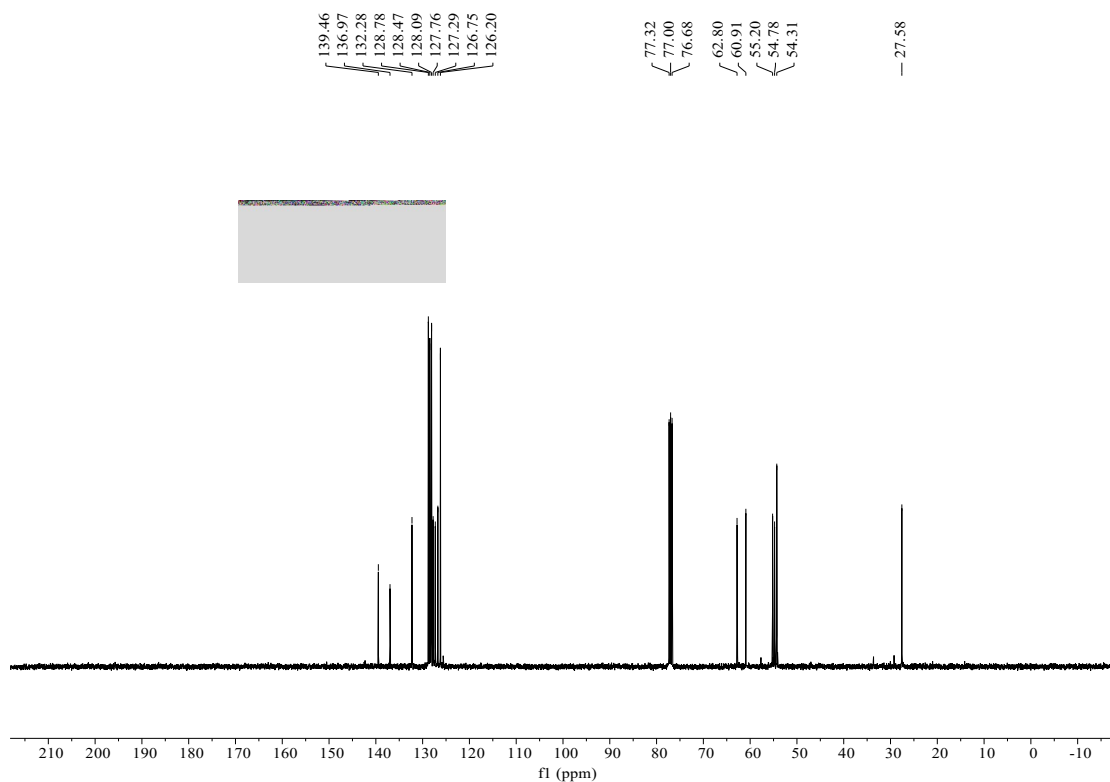

<sup>13</sup>C NMR Spectrum of **3af** in CDCl<sub>3</sub> at 100 MHz

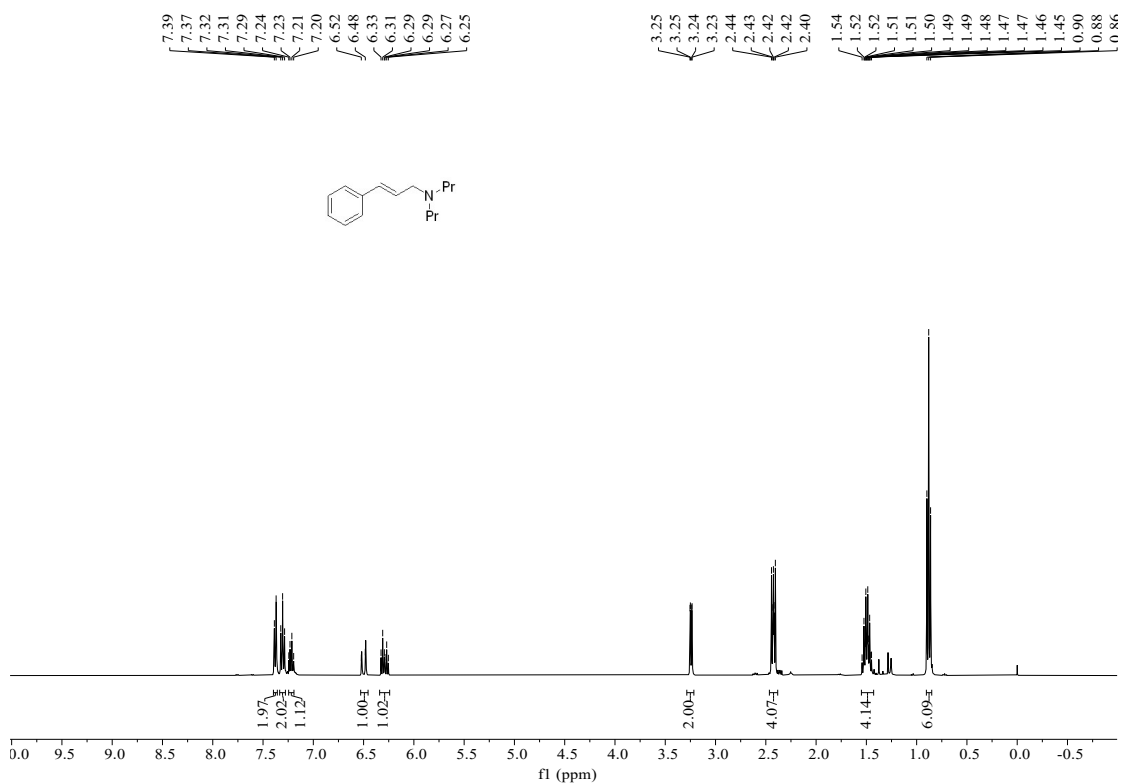

<sup>1</sup>H NMR Spectrum of **3ag** in CDCl<sub>3</sub> at 400 MHz

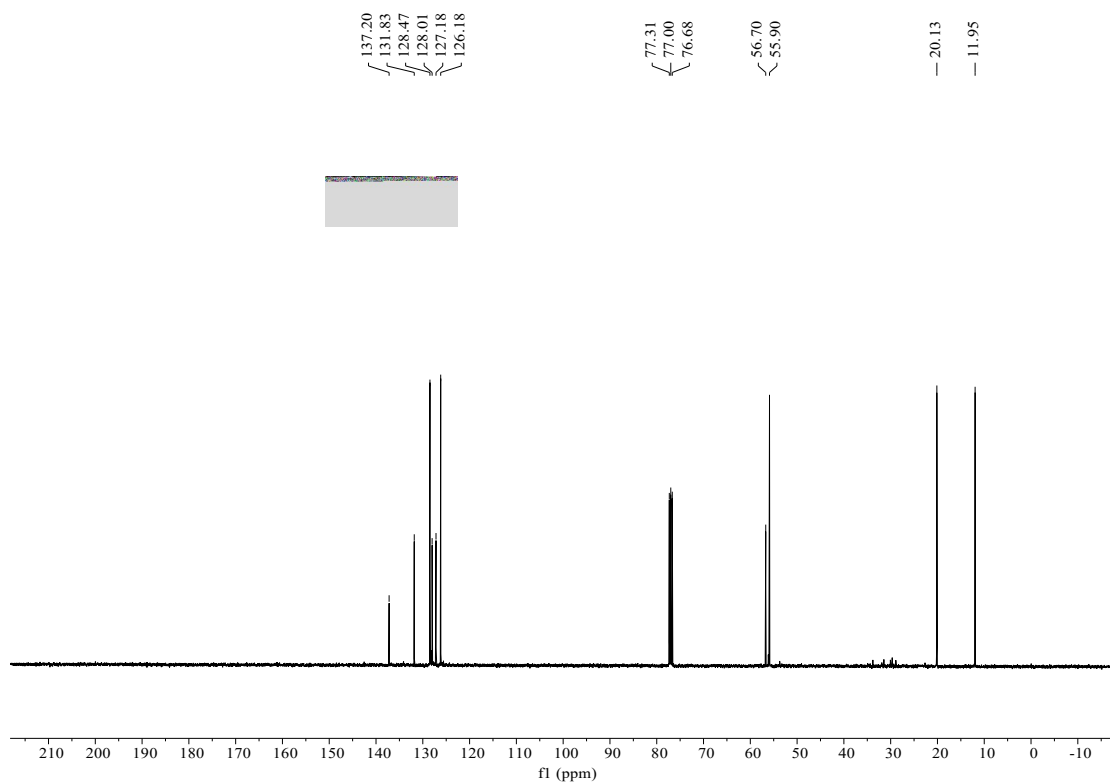

<sup>13</sup>C NMR Spectrum of **3ag** in CDCl<sub>3</sub> at 100 MHz

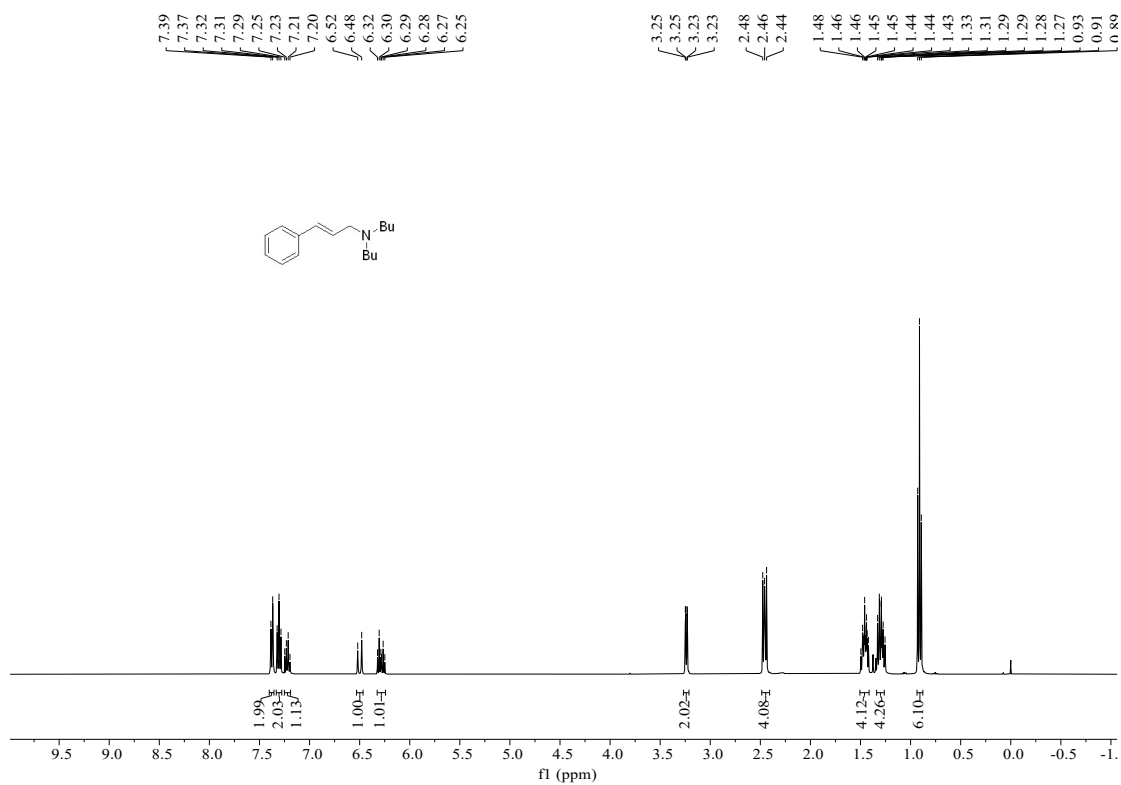

<sup>1</sup>H NMR Spectrum of **3ah** in CDCl<sub>3</sub> at 400 MHz

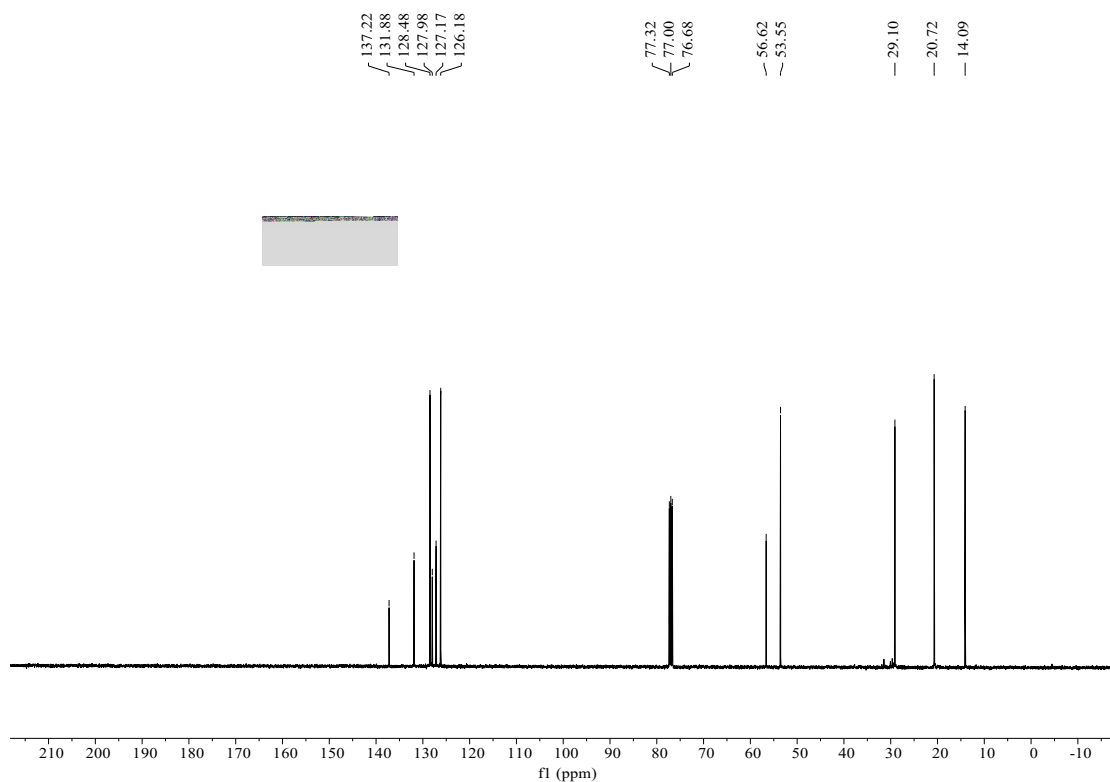

<sup>13</sup>C NMR Spectrum of **3ah** in CDCl<sub>3</sub> at 100 MHz

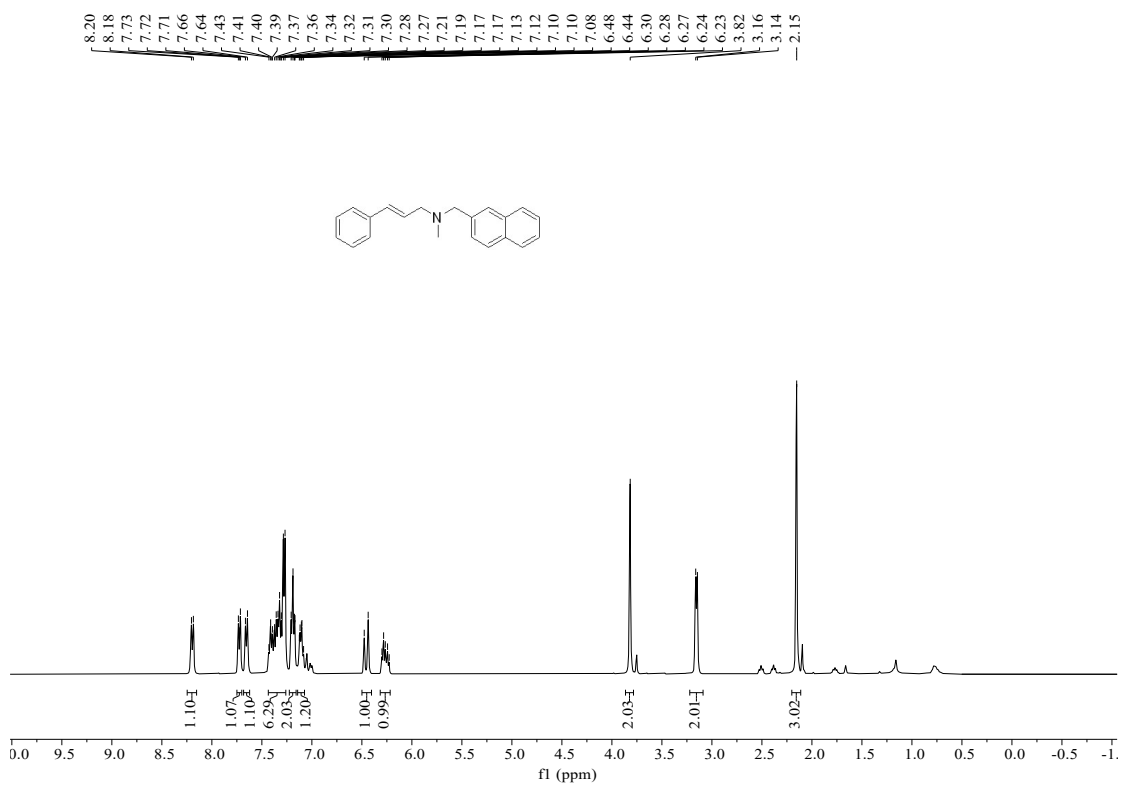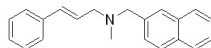

<sup>1</sup>H NMR Spectrum of **3ai** in CDCl<sub>3</sub> at 400 MHz

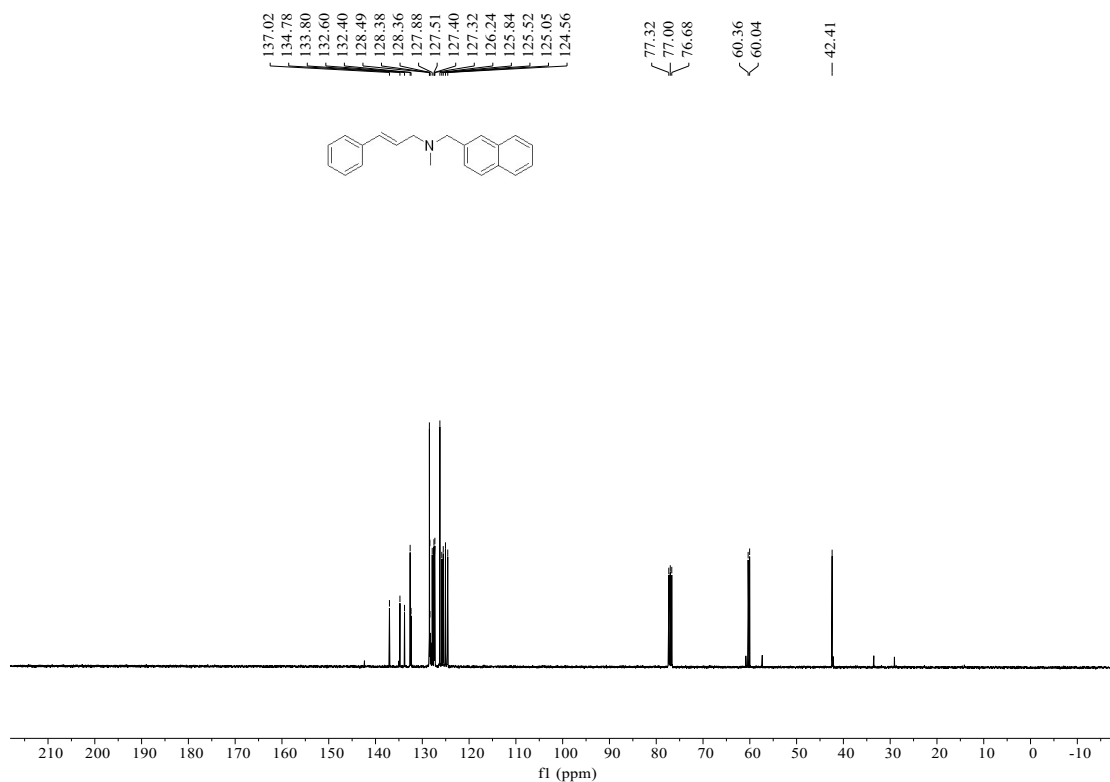

<sup>13</sup>C NMR Spectrum of **3ai** in CDCl<sub>3</sub> at 100 MHz

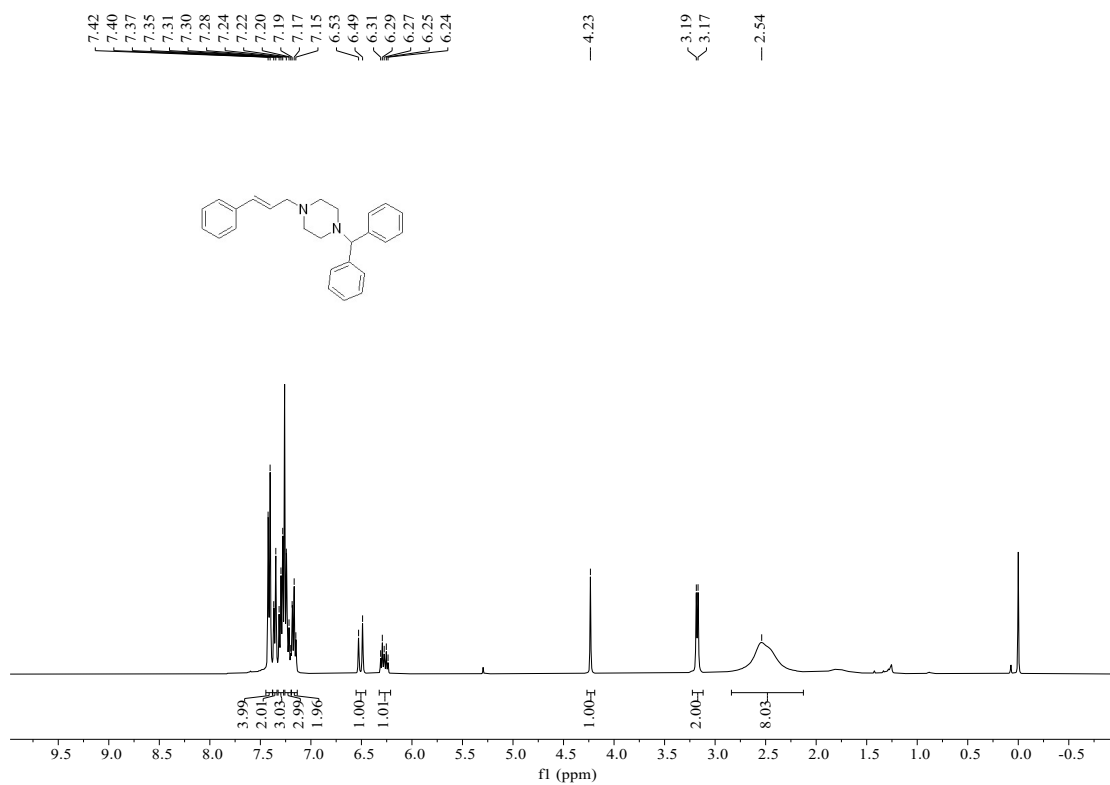

<sup>1</sup>H NMR Spectrum of **3aj** in CDCl<sub>3</sub> at 400 MHz

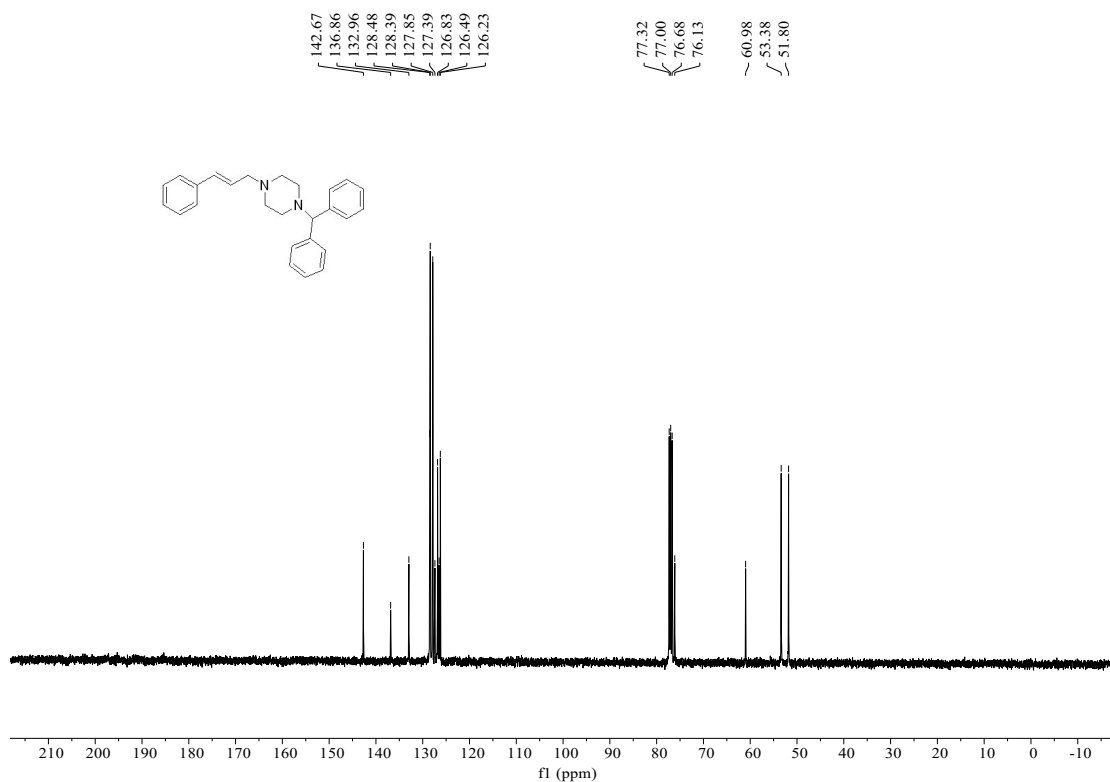

$^{13}\text{C}$  NMR Spectrum of **3aj** in  $\text{CDCl}_3$  at 100 MHz

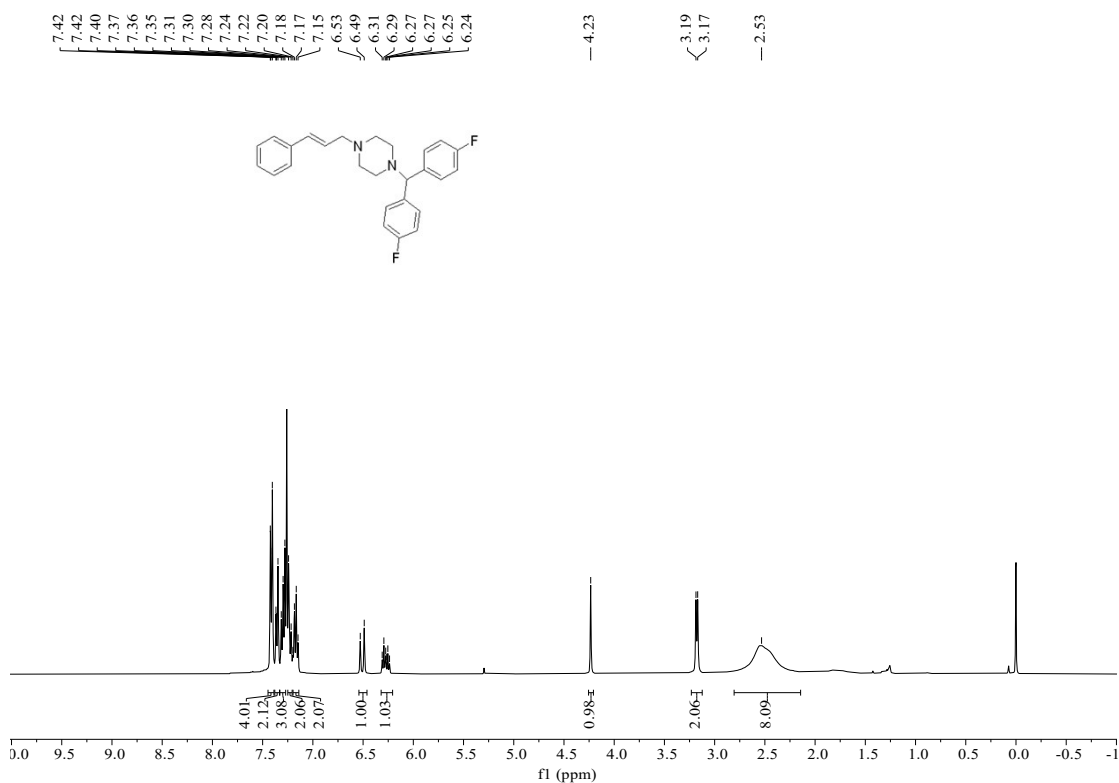

$^1\text{H}$  NMR Spectrum of **3ak** in  $\text{CDCl}_3$  at 400 MHz

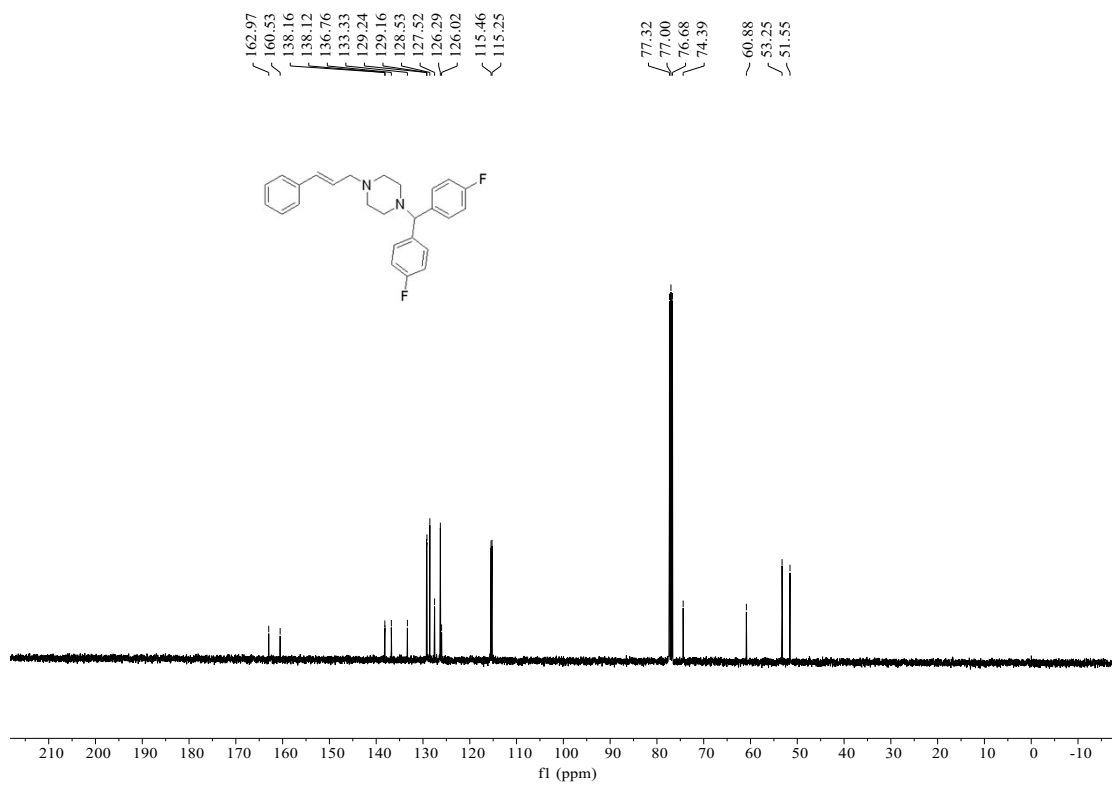

<sup>13</sup>C NMR Spectrum of **3ak** in CDCl<sub>3</sub> at 100 MHz

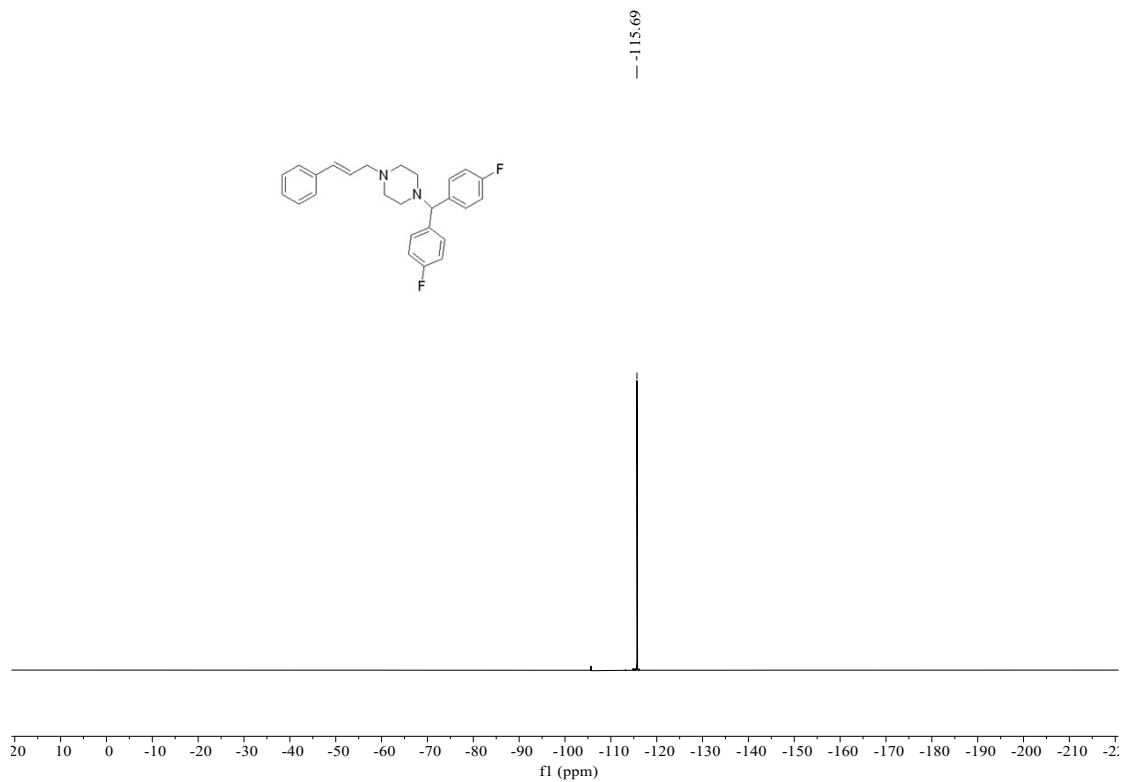

<sup>19</sup>F NMR Spectrum of **3ak** in CDCl<sub>3</sub> at 377 MHz

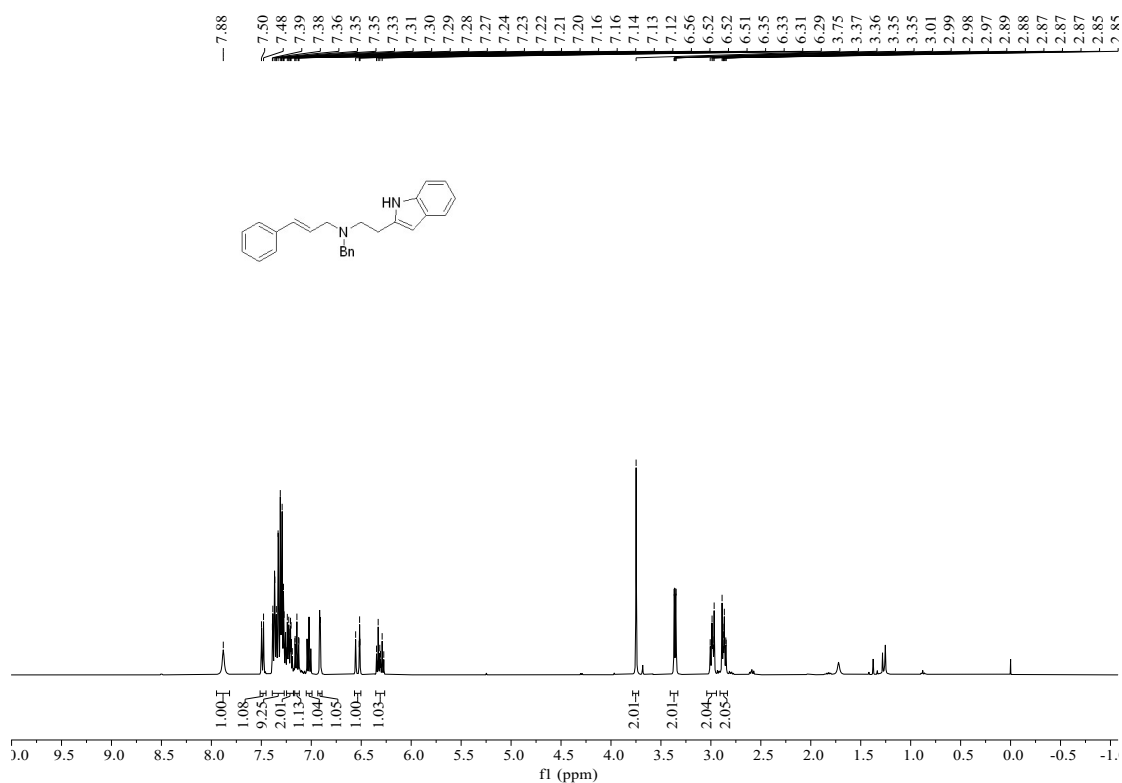

<sup>1</sup>H NMR Spectrum of **3al** in CDCl<sub>3</sub> at 400 MHz

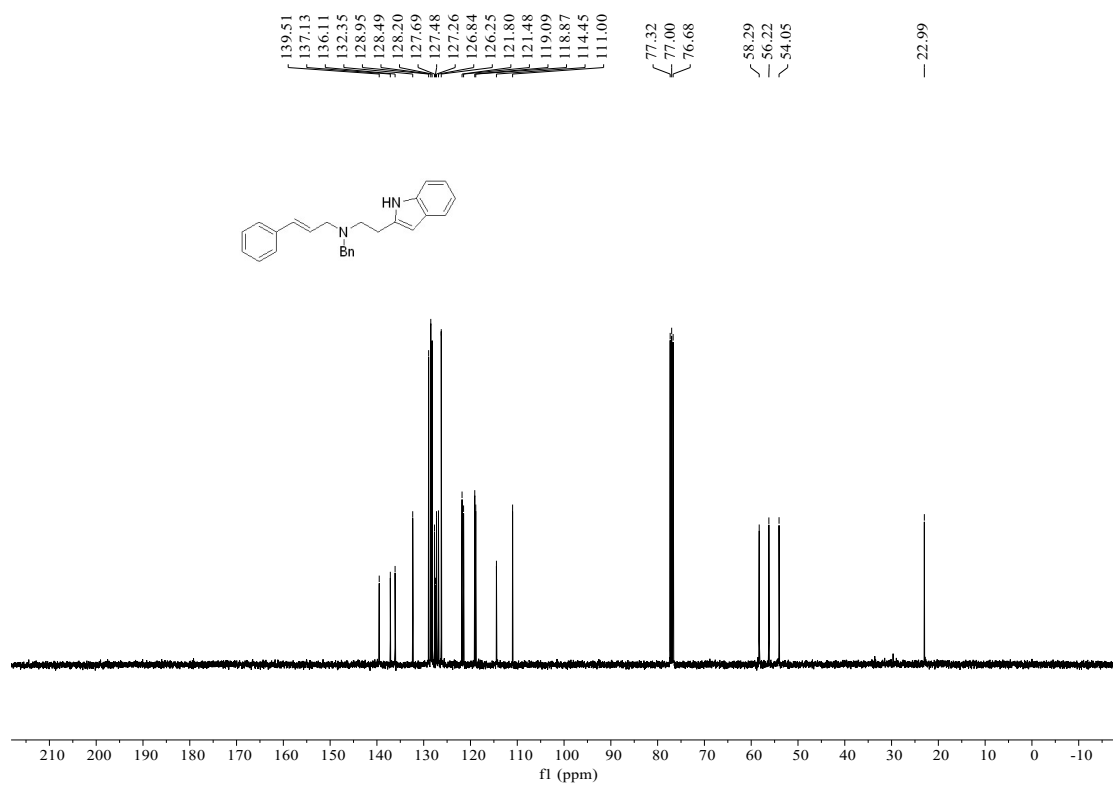

<sup>13</sup>C NMR Spectrum of **3al** in CDCl<sub>3</sub> at 100 MHz

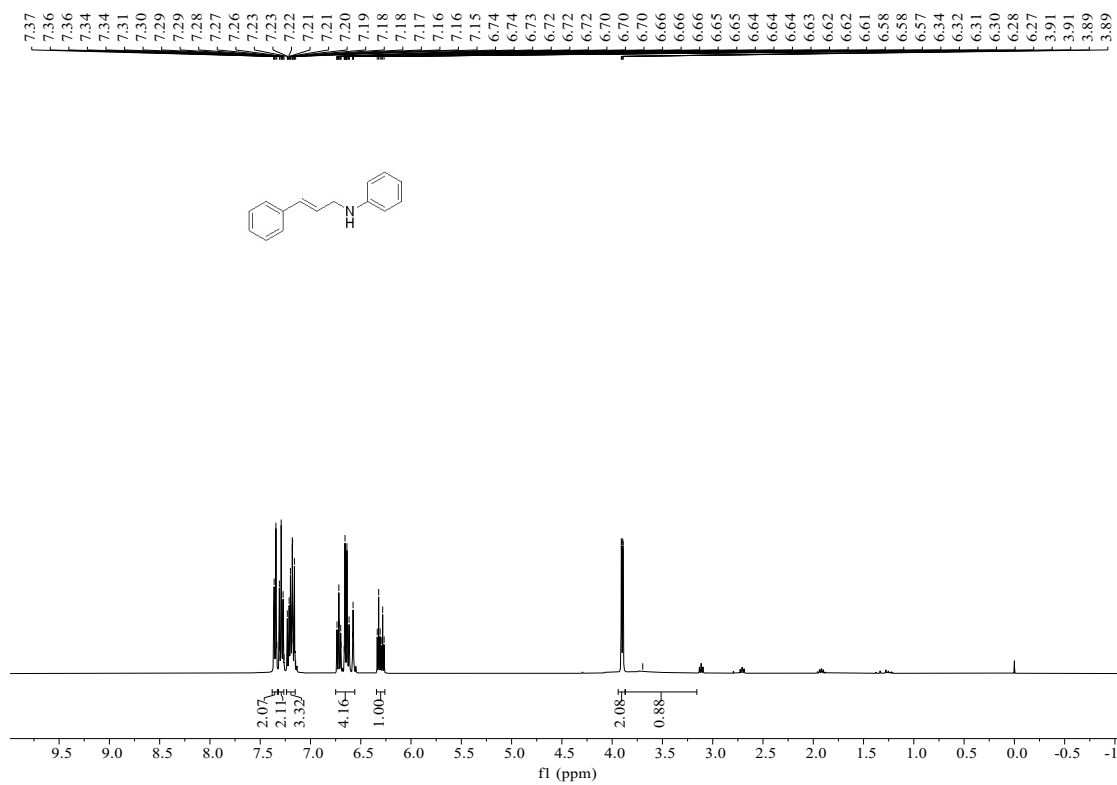

<sup>1</sup>H NMR Spectrum of **5aa** in CDCl<sub>3</sub> at 400 MHz

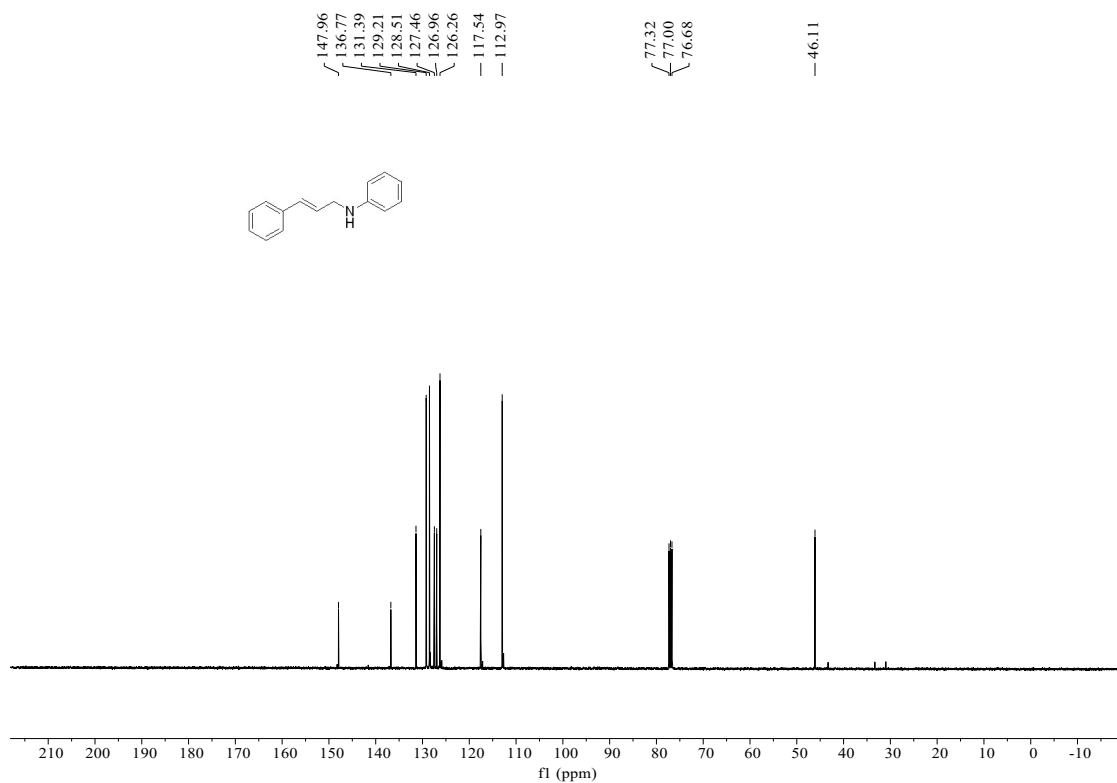

<sup>13</sup>C NMR Spectrum of **5aa** in CDCl<sub>3</sub> at 100 MHz



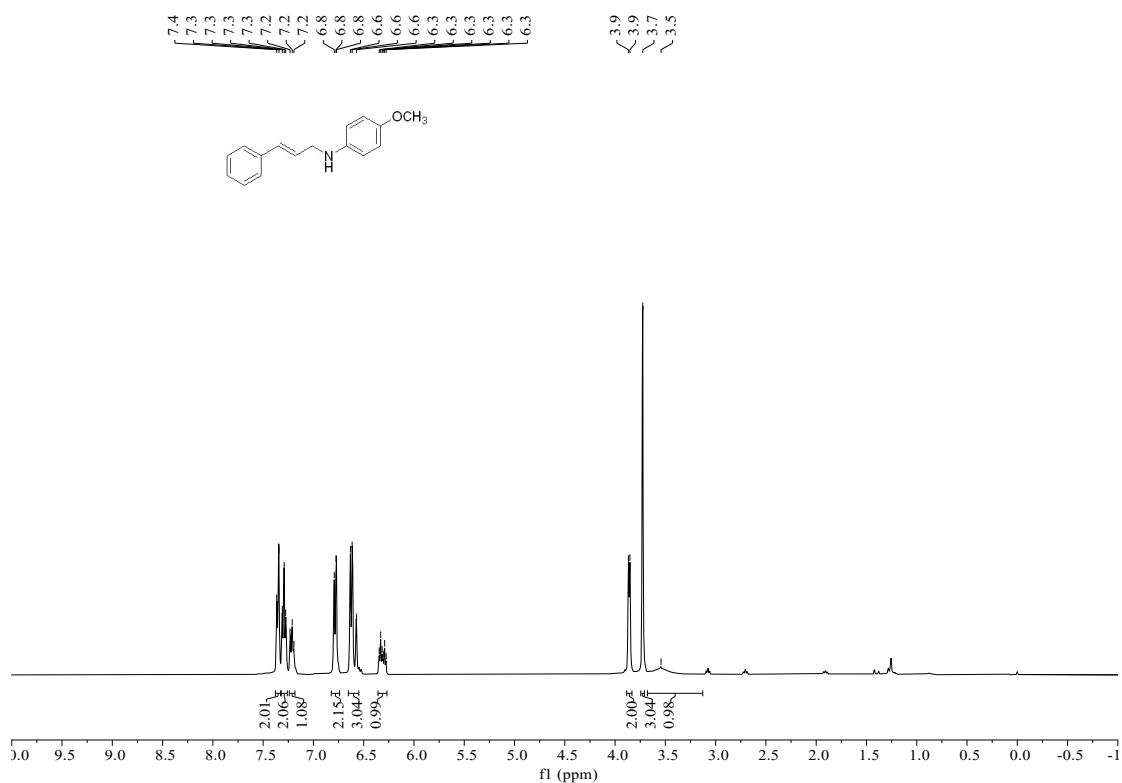

<sup>1</sup>H NMR Spectrum of **5ab** in CDCl<sub>3</sub> at 400 MHz

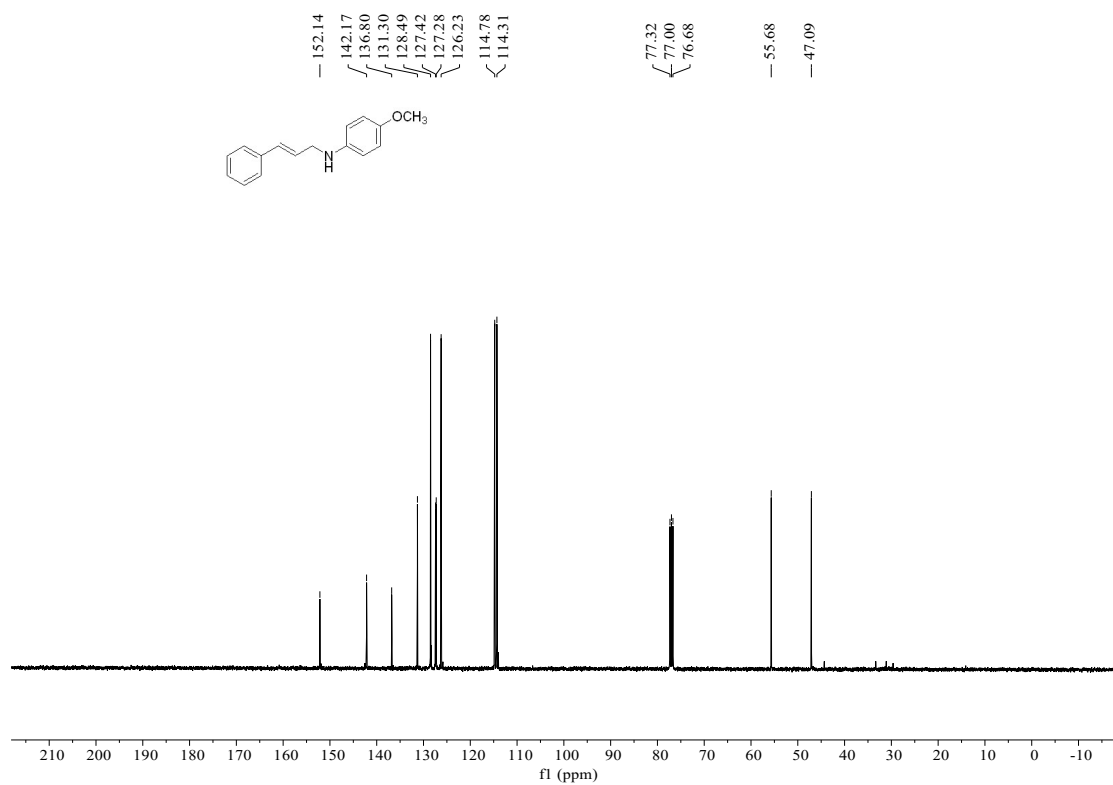

<sup>13</sup>C NMR Spectrum of **5ab** in CDCl<sub>3</sub> at 100 MHz

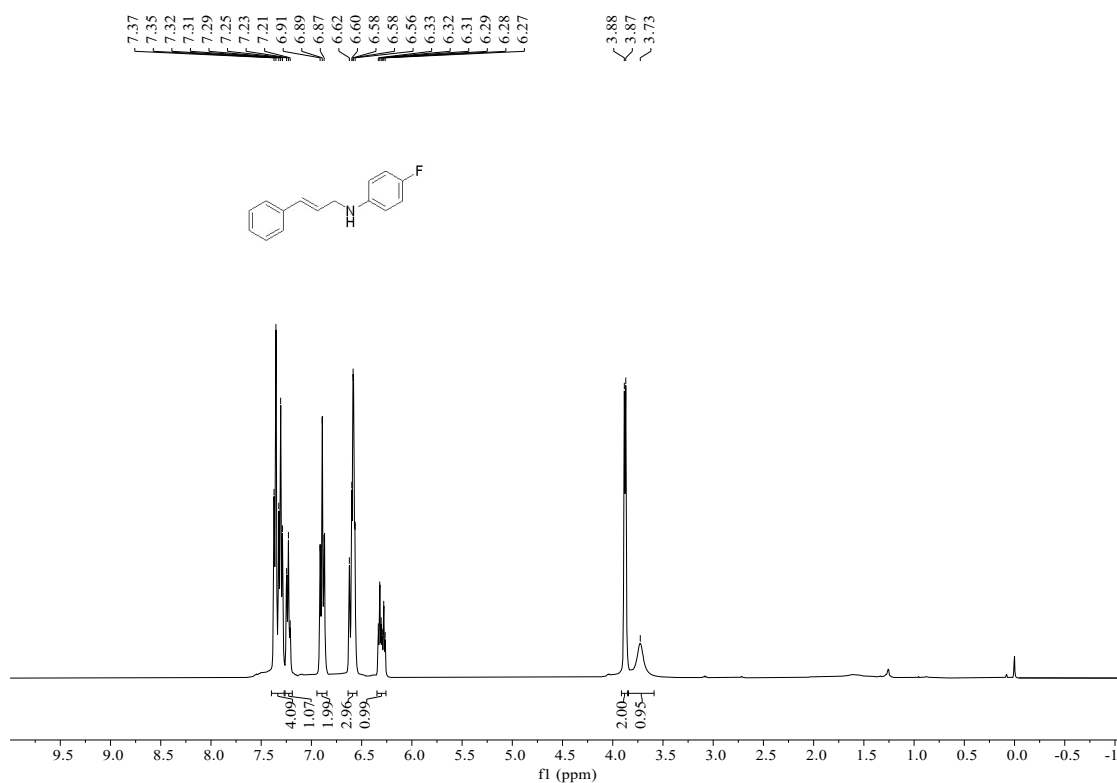

<sup>1</sup>H NMR Spectrum of **5ac** in CDCl<sub>3</sub> at 400 MHz

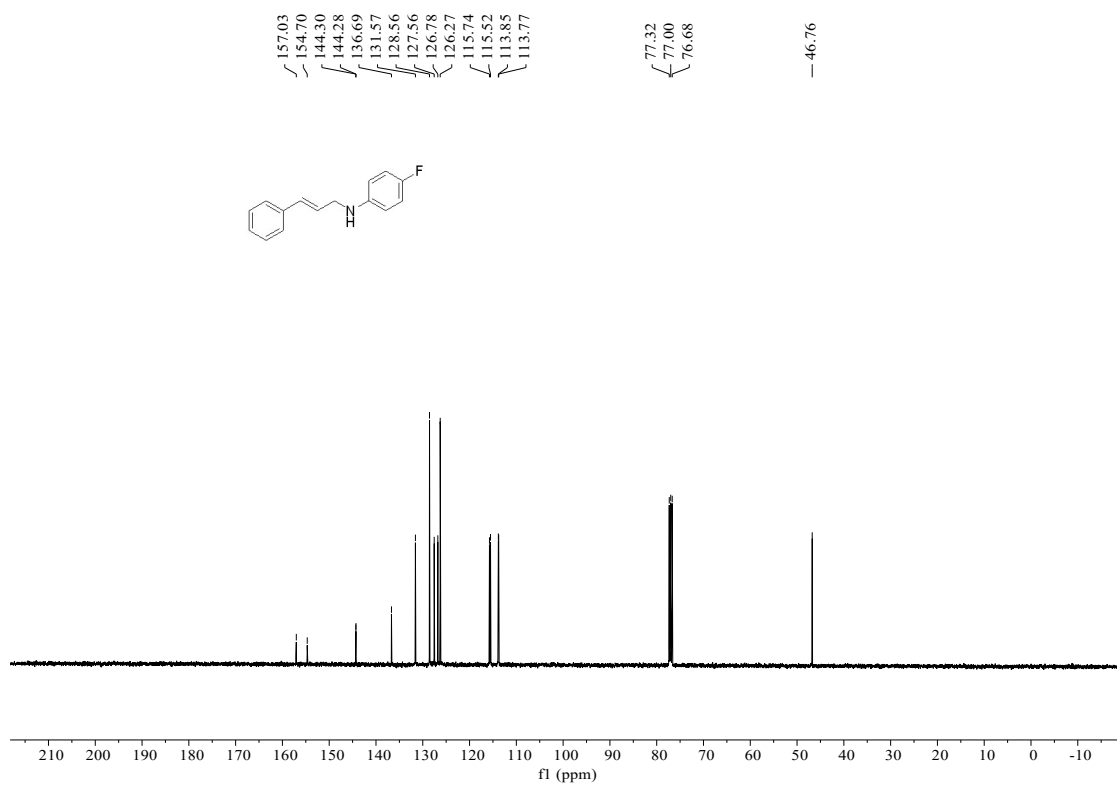

<sup>13</sup>C NMR Spectrum of **5ac** in CDCl<sub>3</sub> at 100 MHz

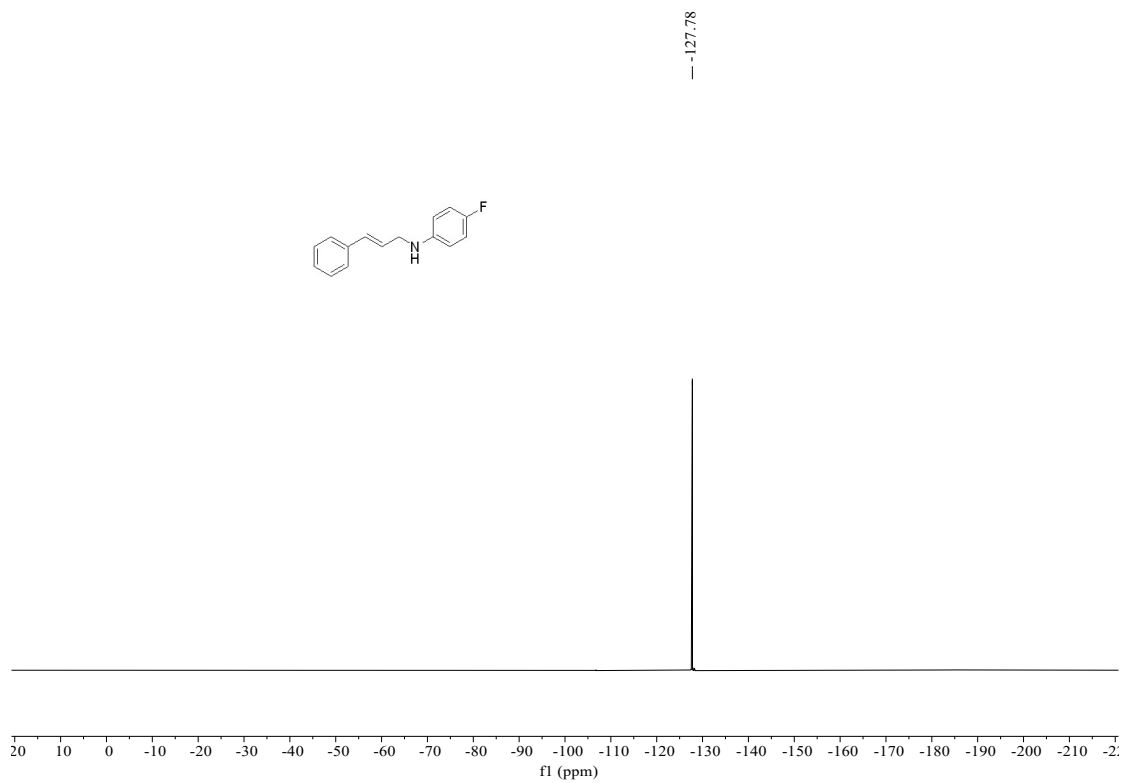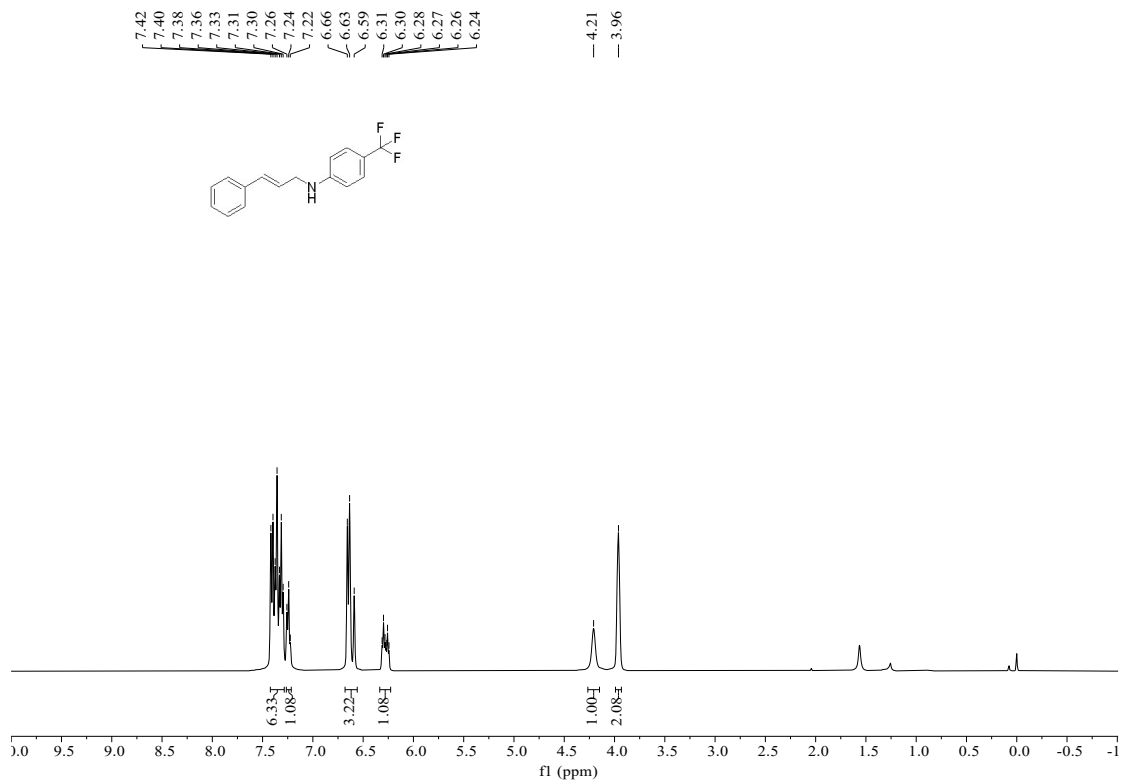

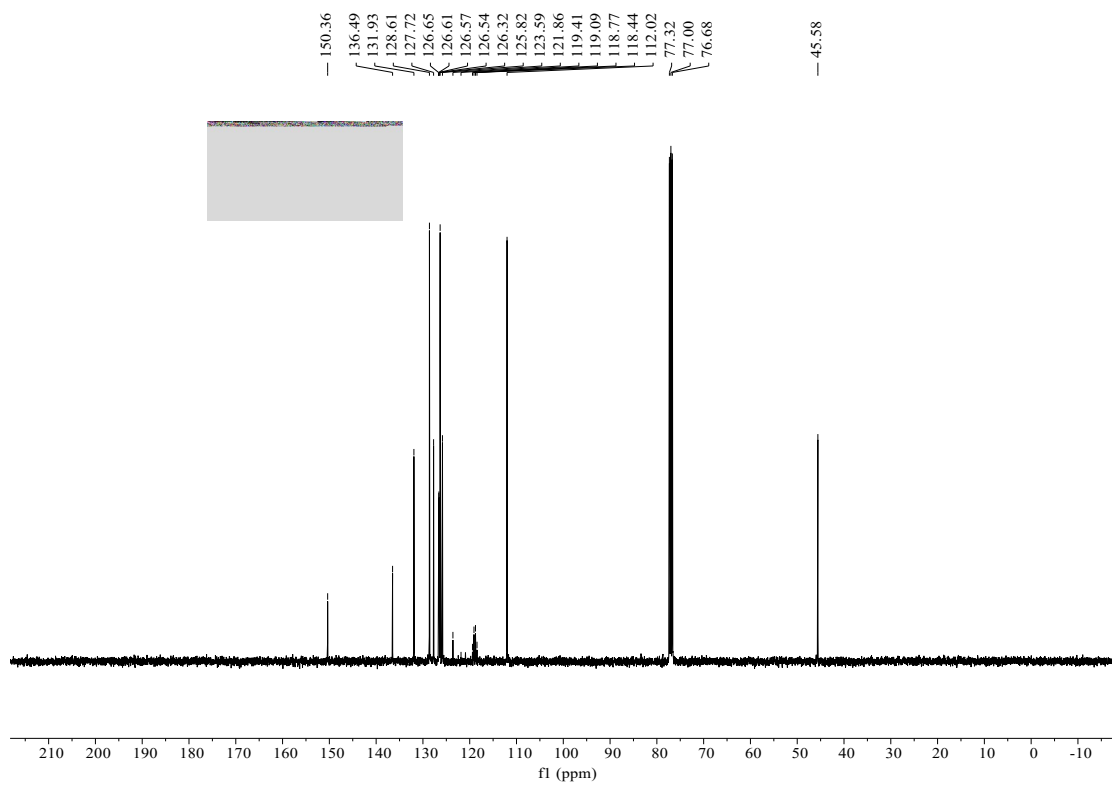

$^{13}\text{C}$  NMR Spectrum of **5ad** in  $\text{CDCl}_3$  at 100 MHz

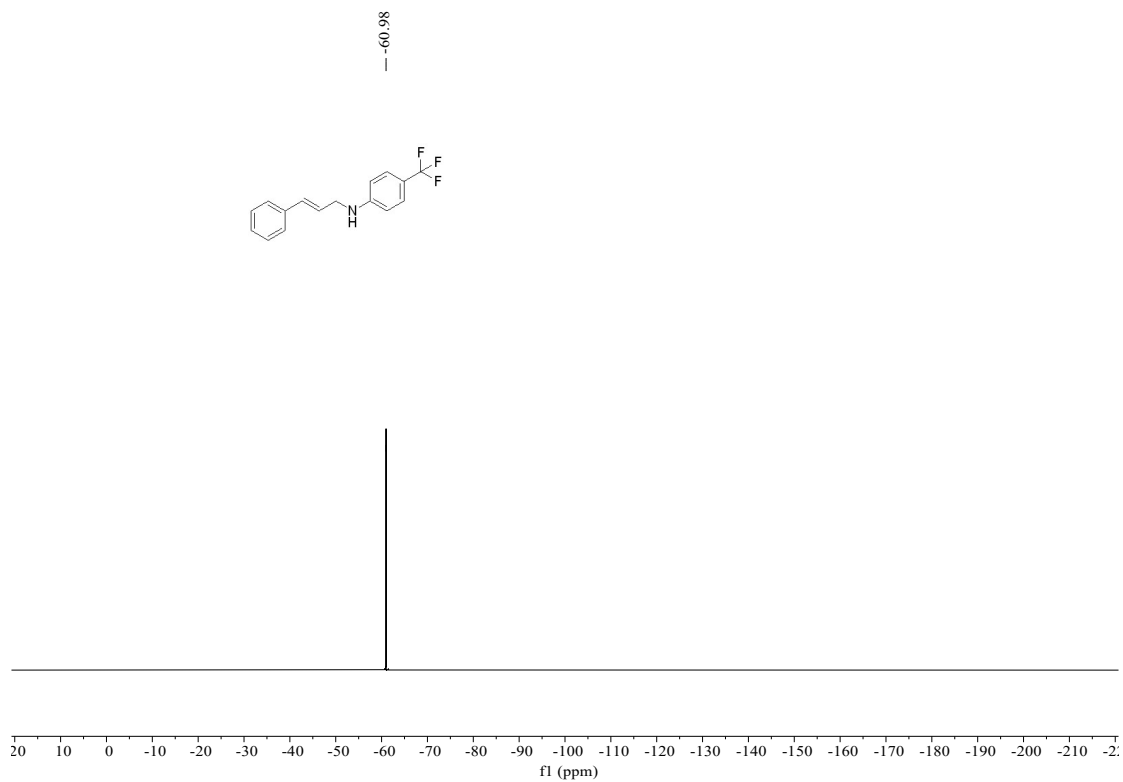

$^{19}\text{F}$  NMR Spectrum of **5ad** in  $\text{CDCl}_3$  at 377 MHz

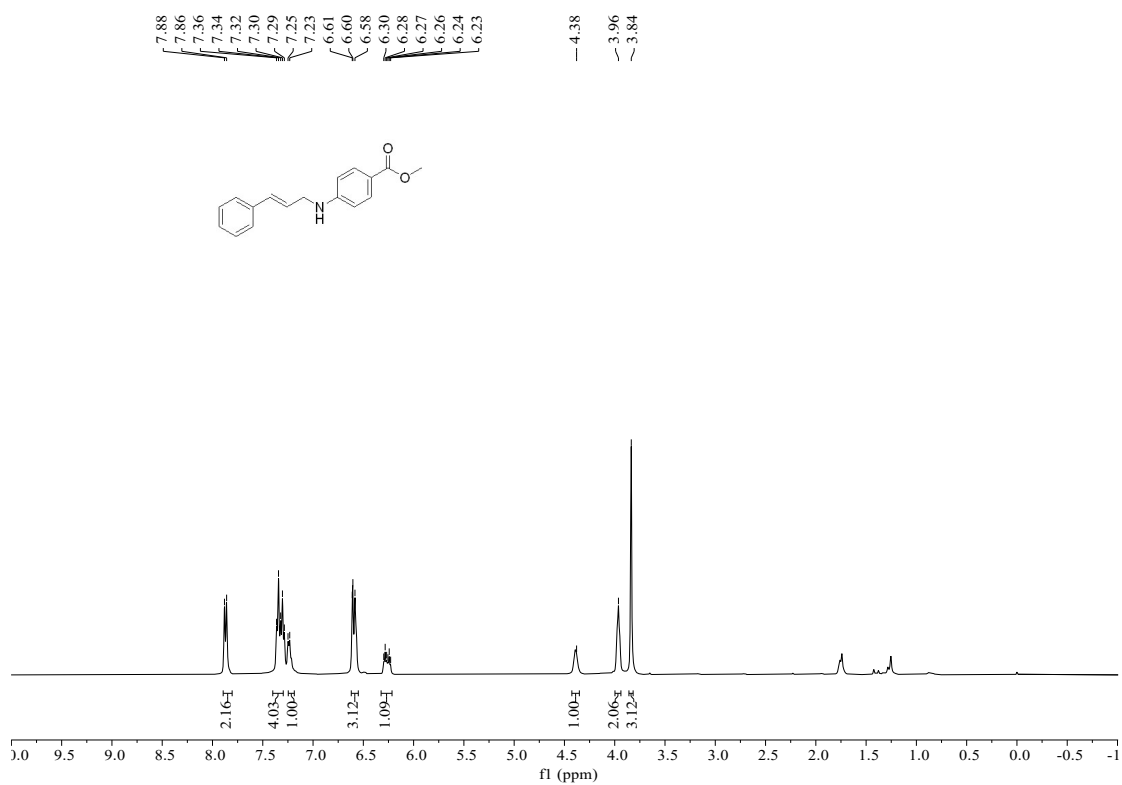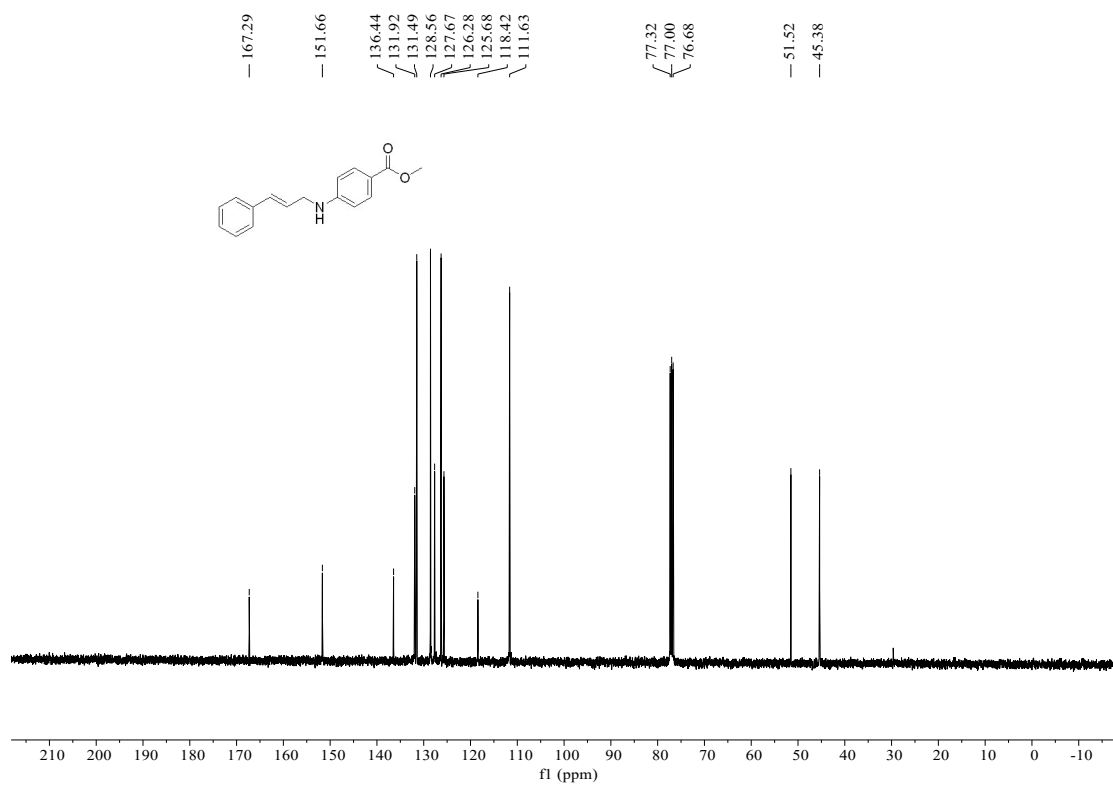

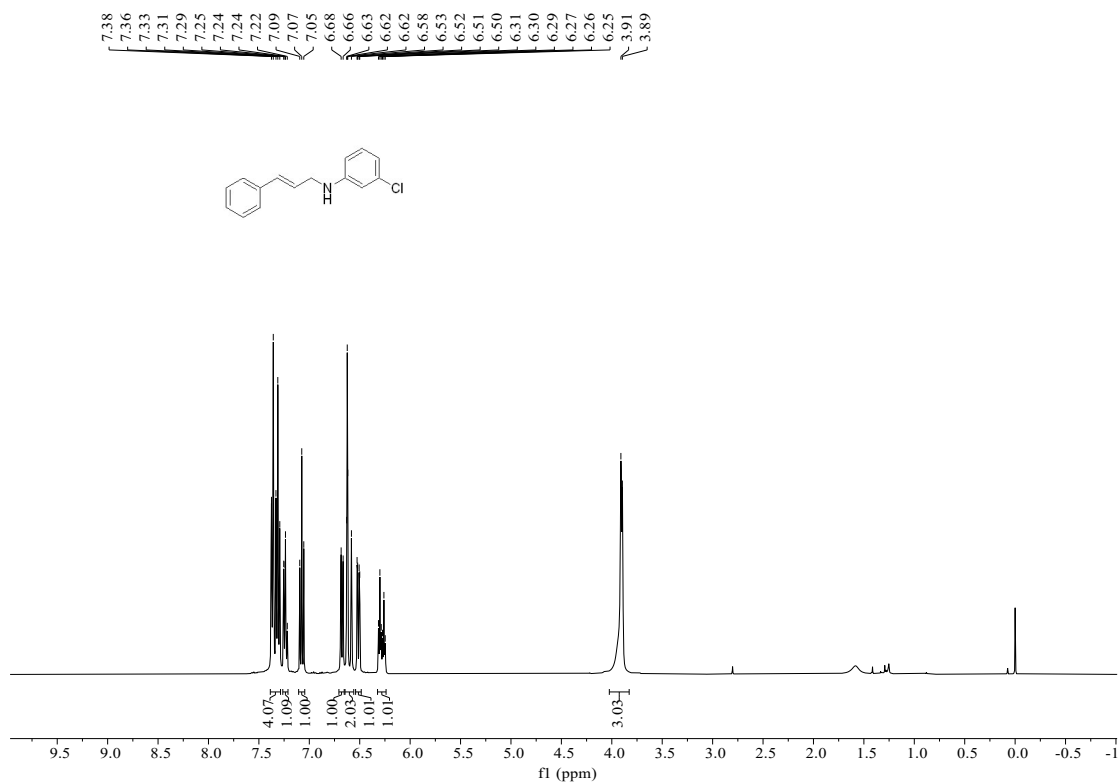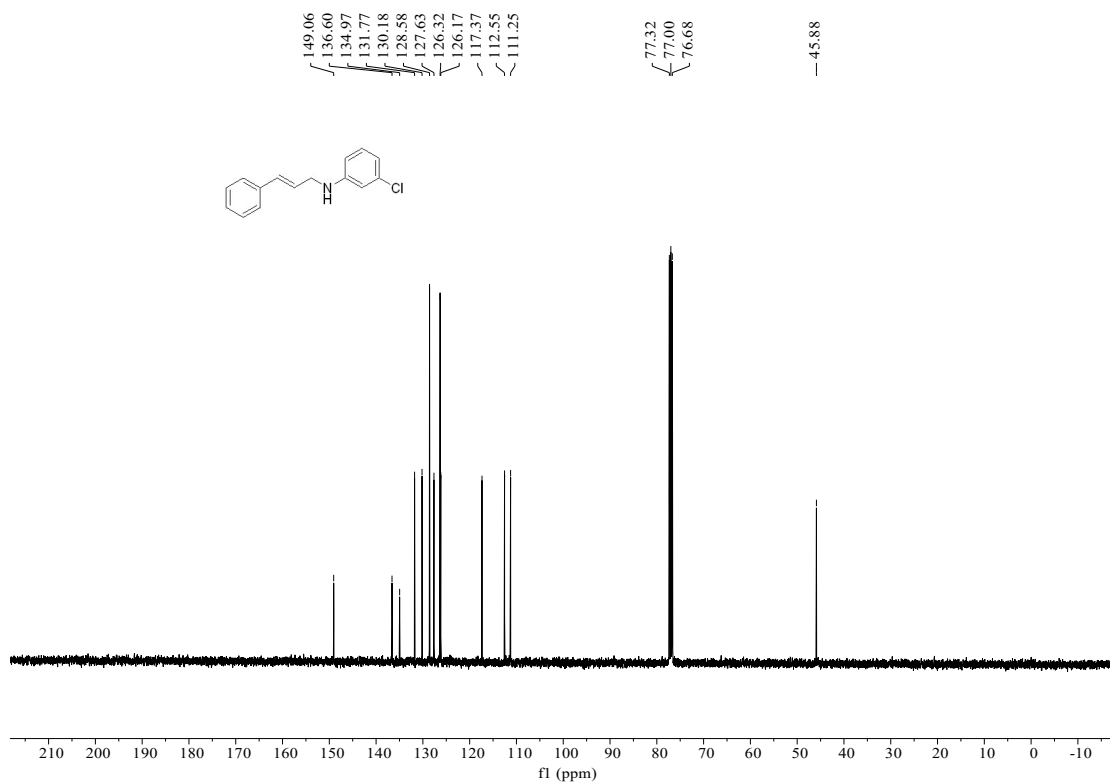

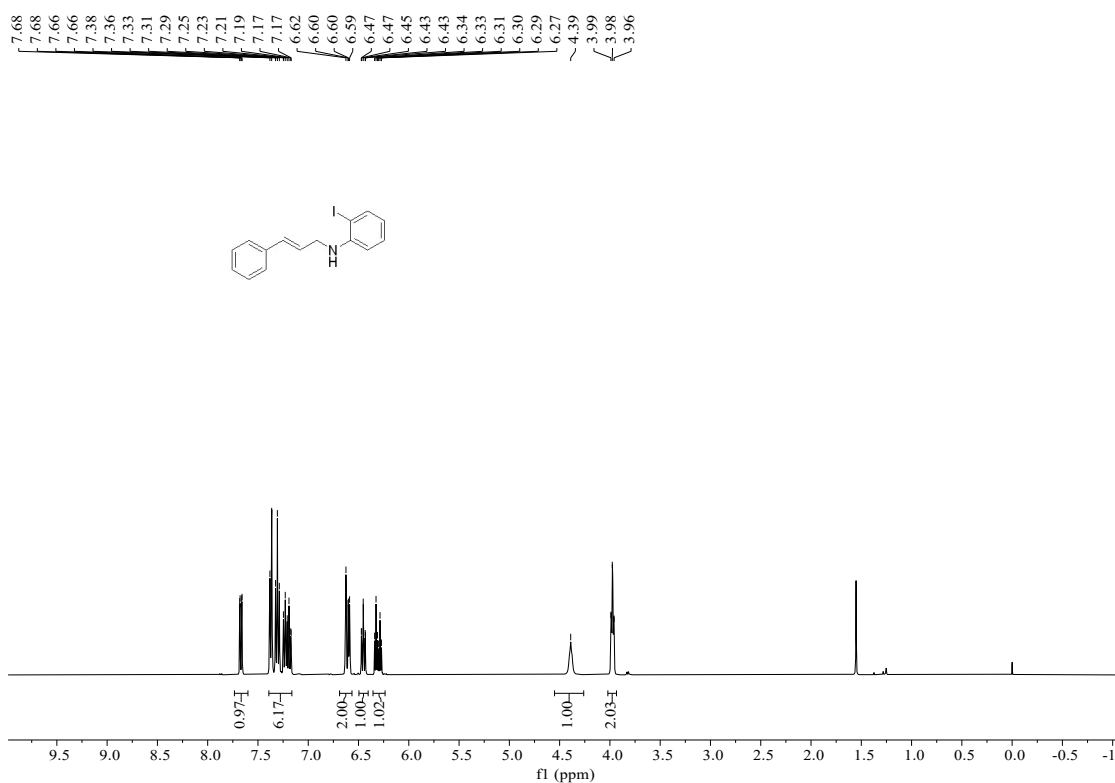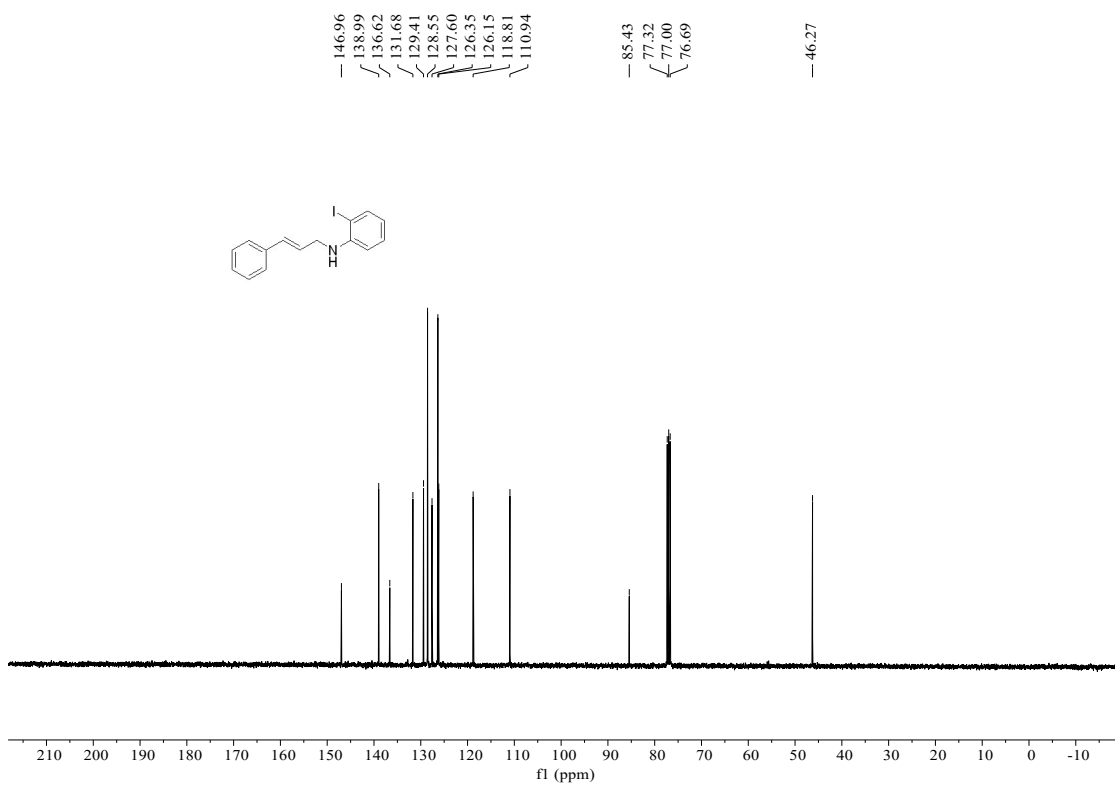

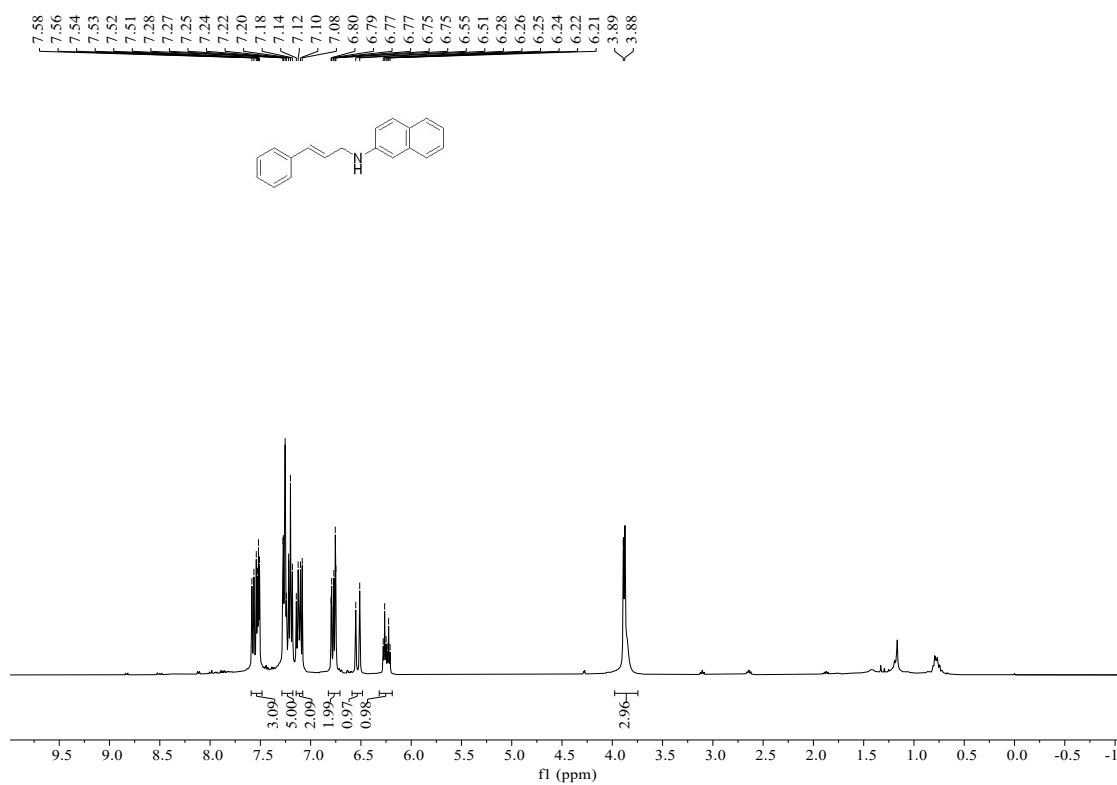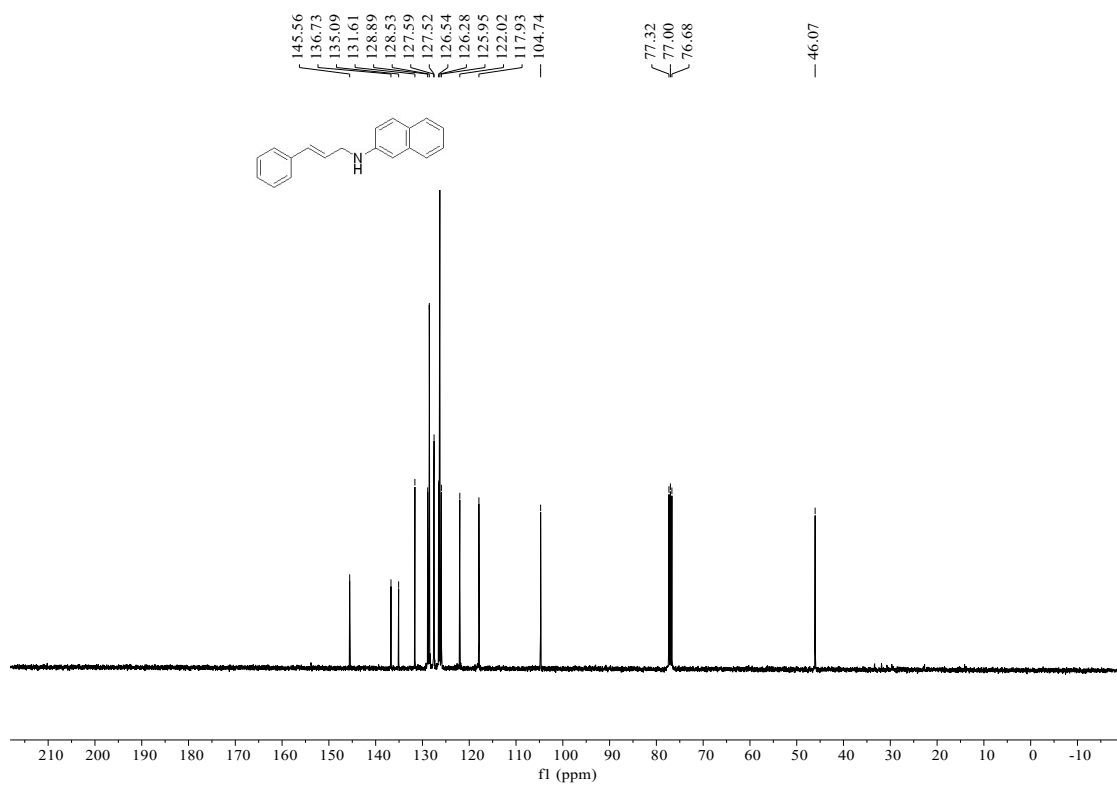



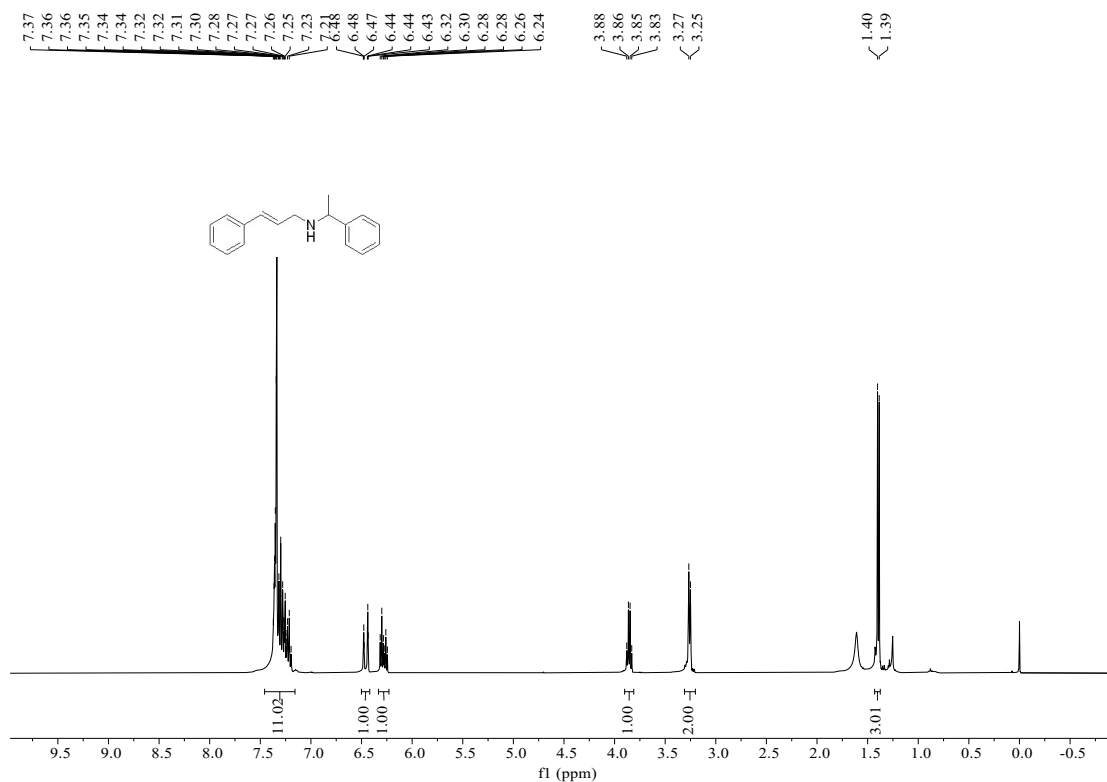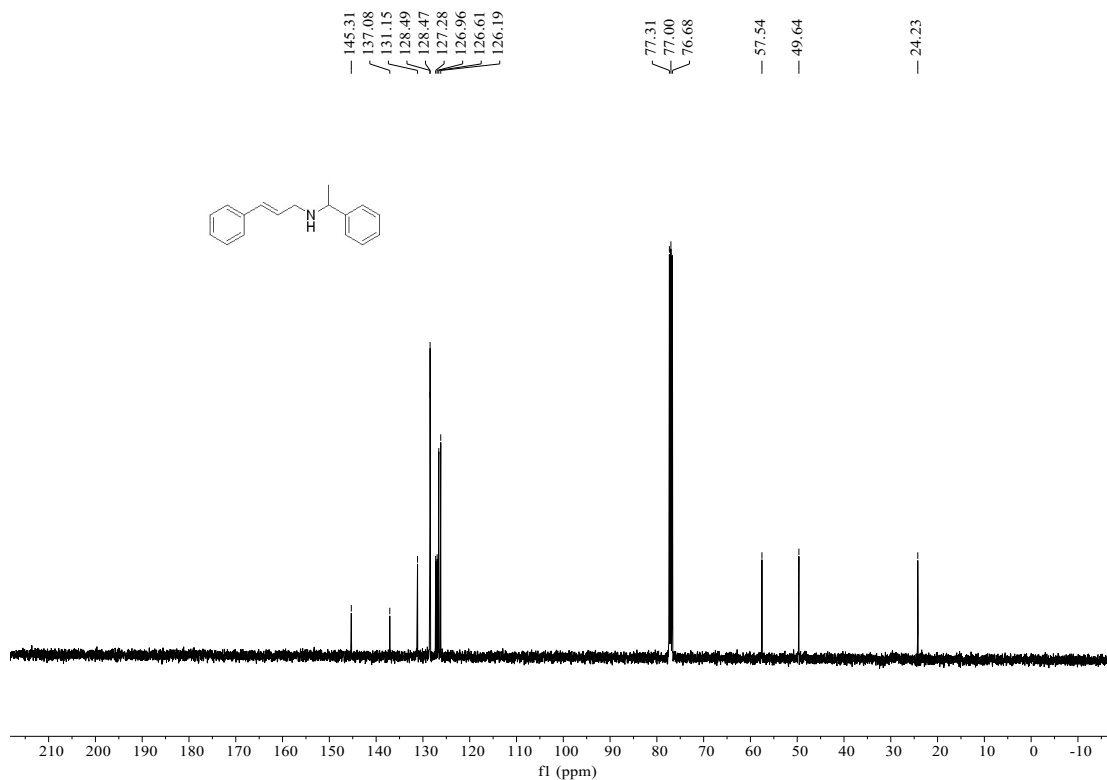

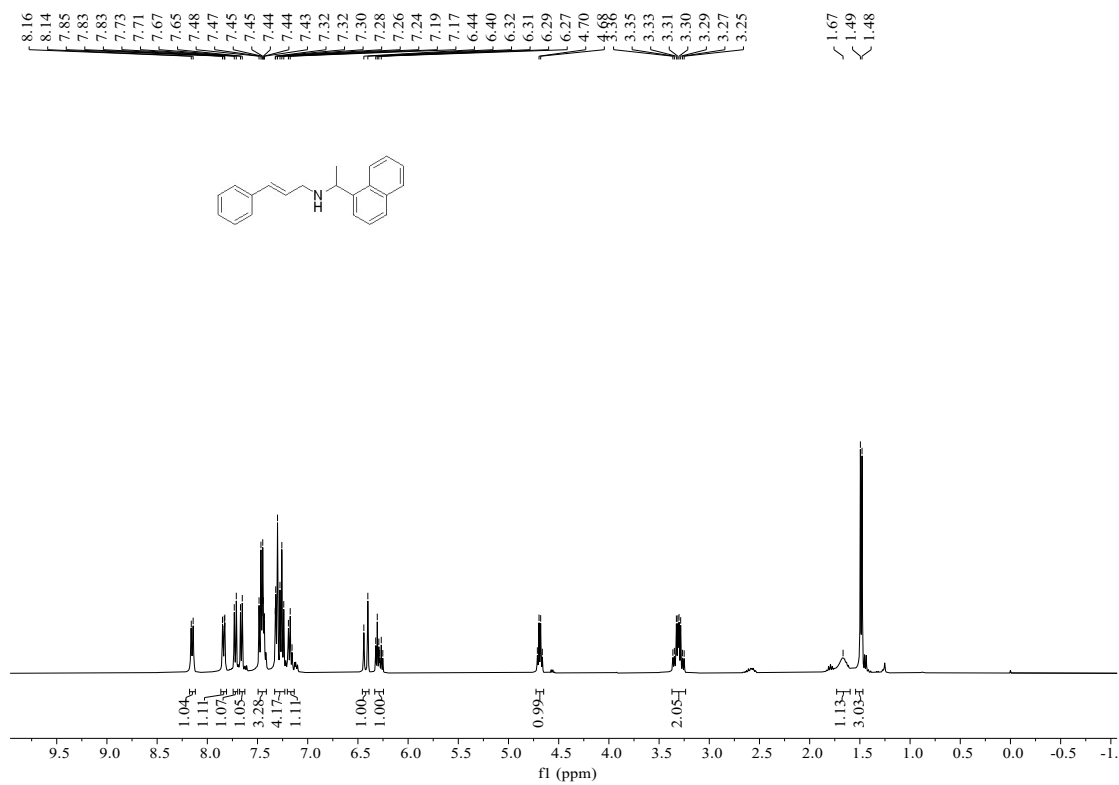

**<sup>1</sup>H NMR Spectrum of 5aj in CDCl<sub>3</sub> at 400 MHz**

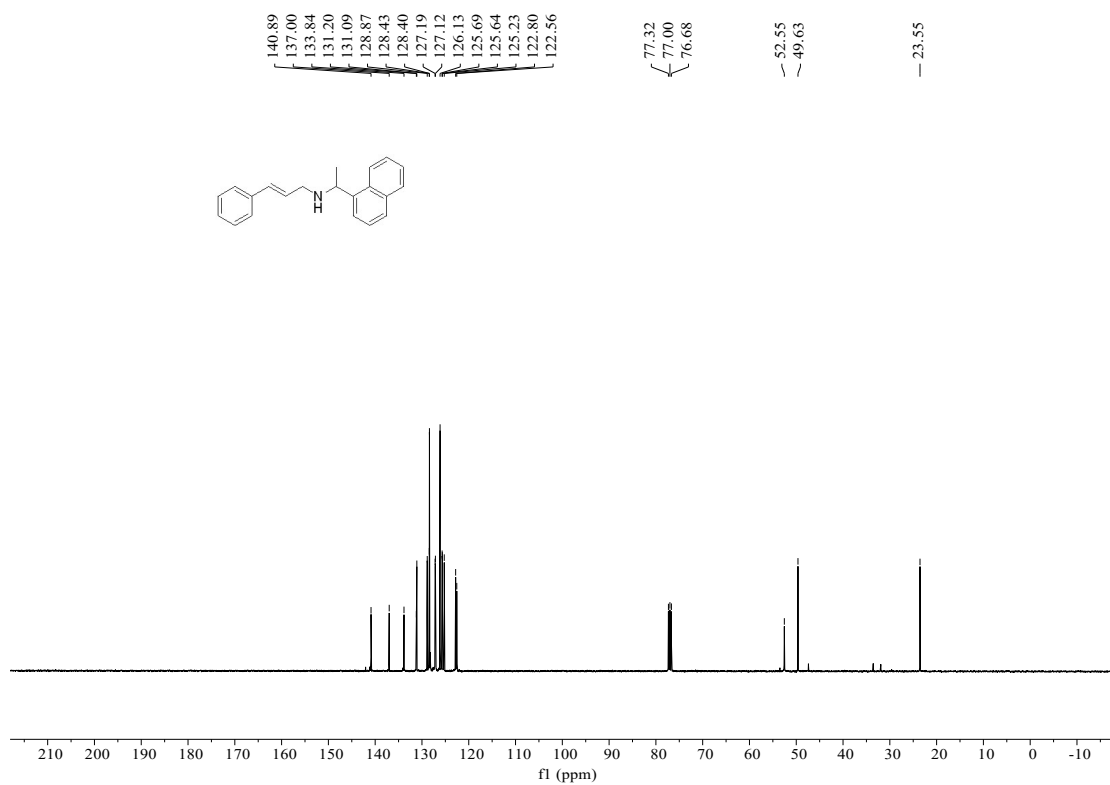

**<sup>13</sup>C NMR Spectrum of 5aj in CDCl<sub>3</sub> at 100 MHz**

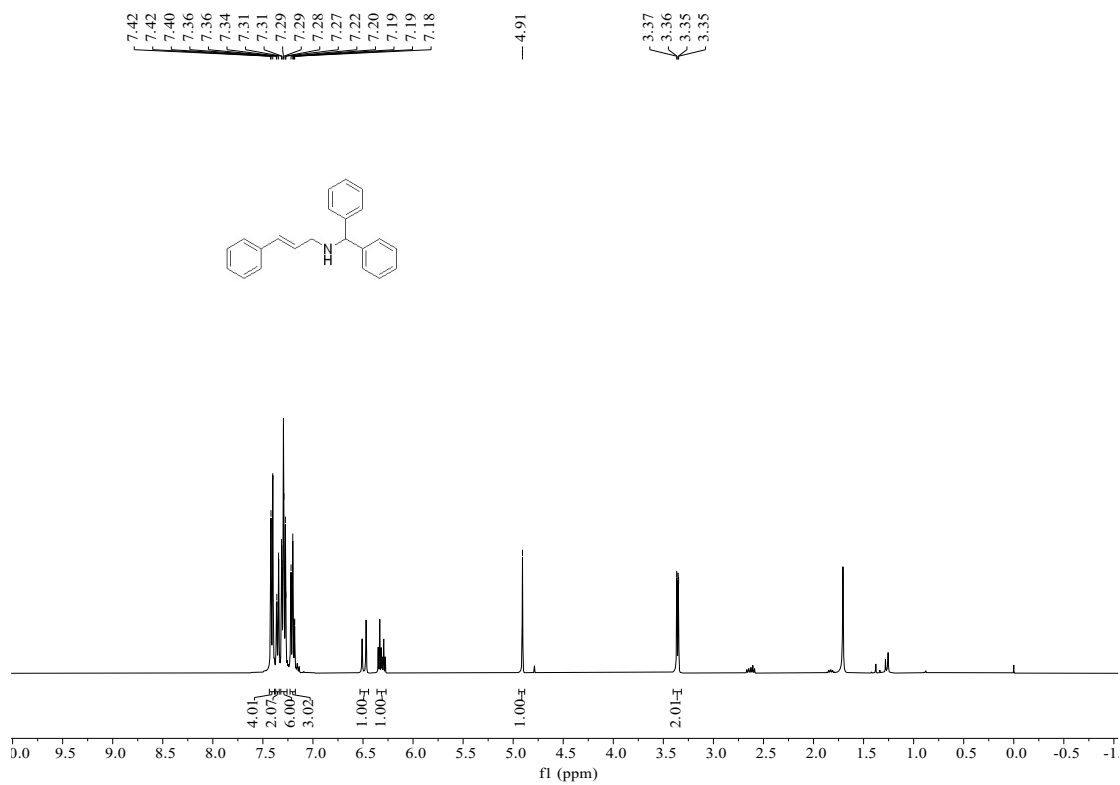

<sup>1</sup>H NMR Spectrum of **5ak** in CDCl<sub>3</sub> at 400 MHz

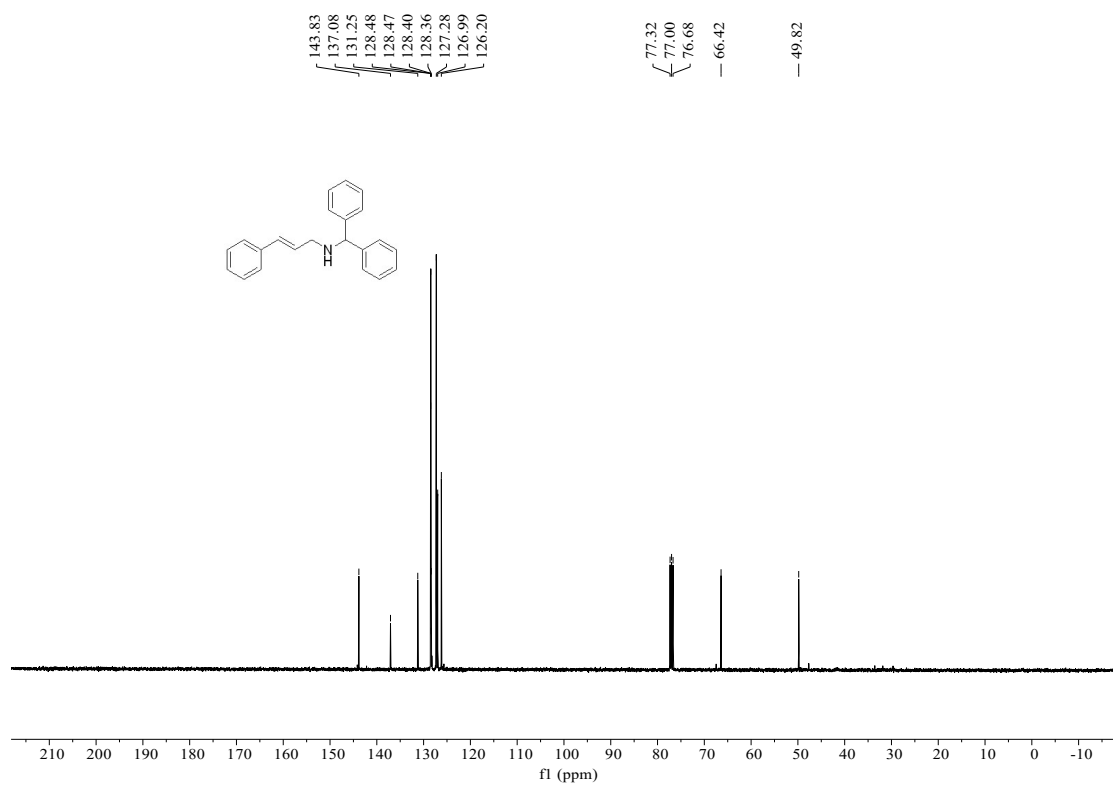

<sup>13</sup>C NMR Spectrum of **5ak** in CDCl<sub>3</sub> at 100 MHz

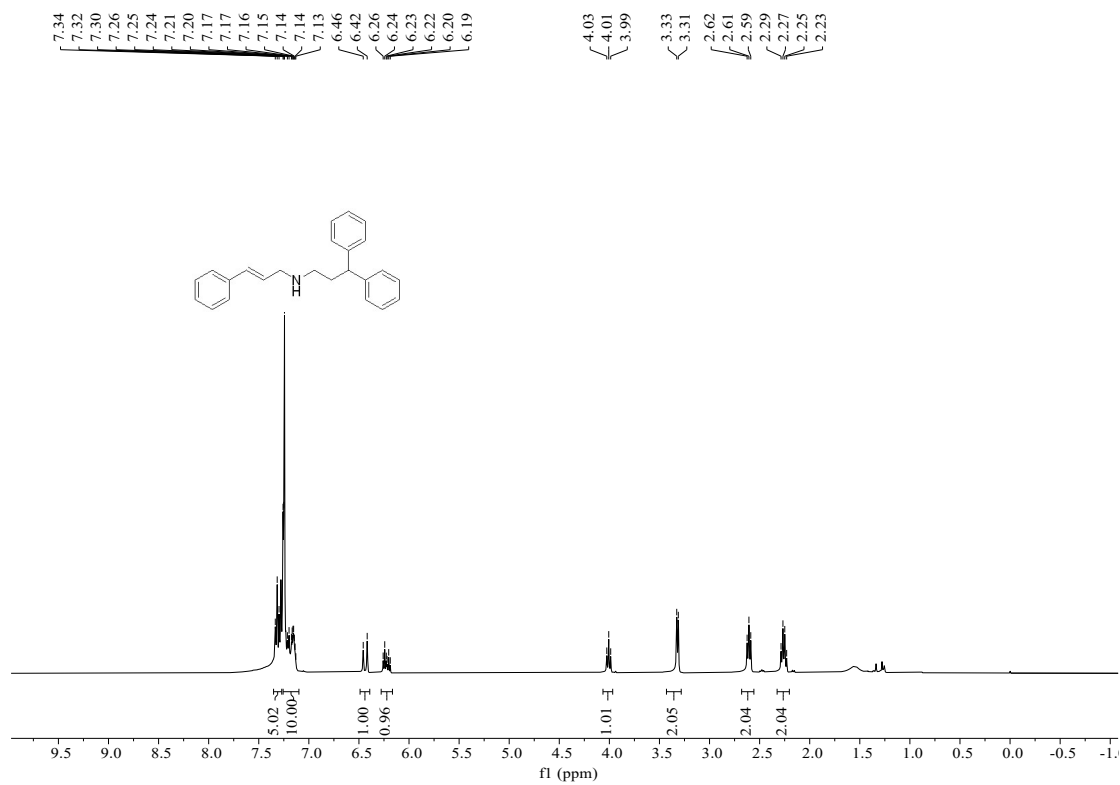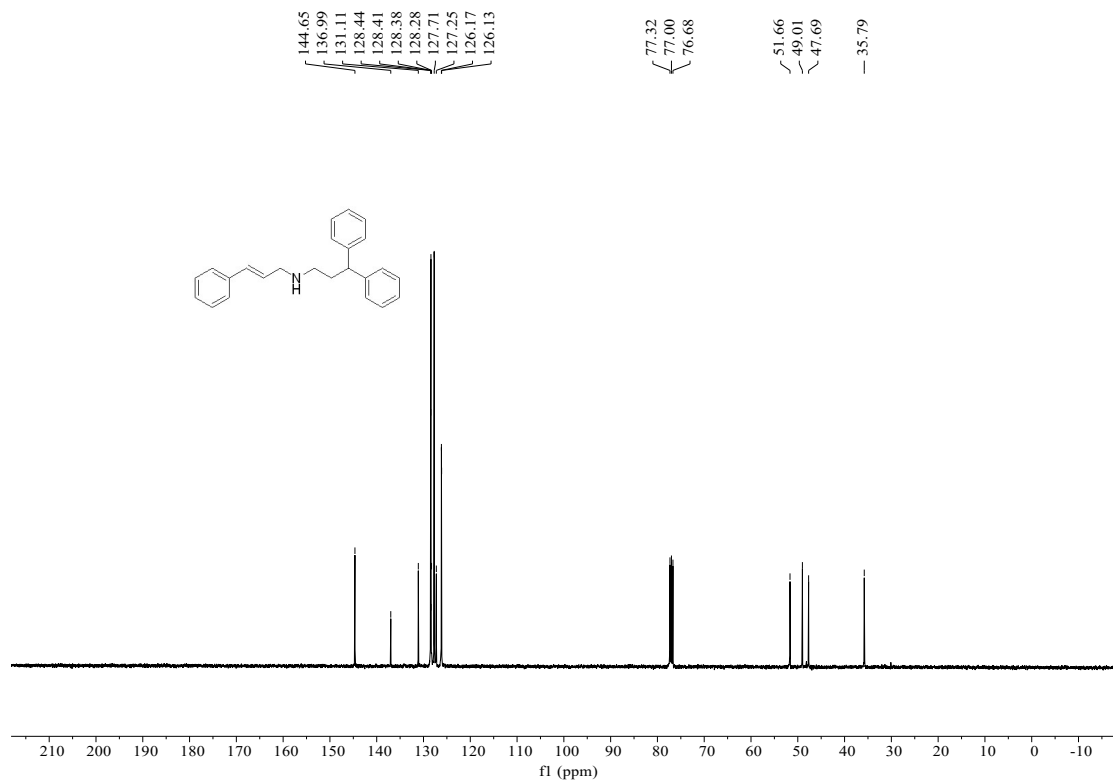

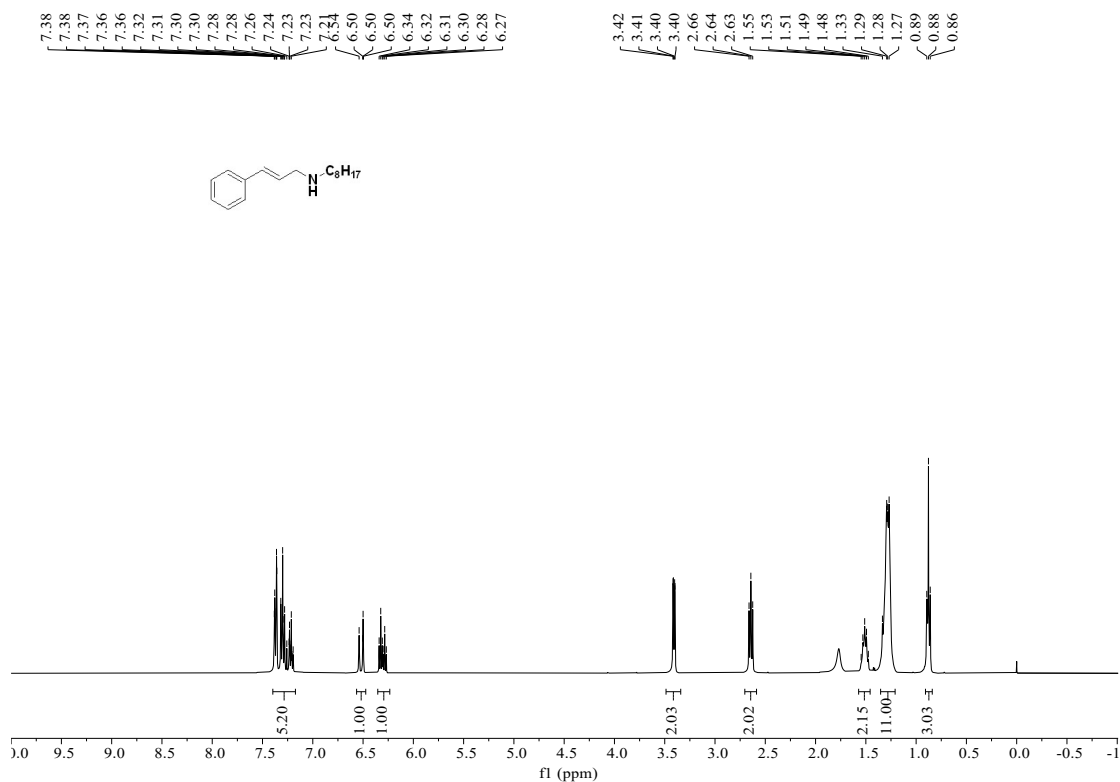

$^1\text{H}$  NMR Spectrum of **5am** in  $\text{CDCl}_3$  at 400 MHz

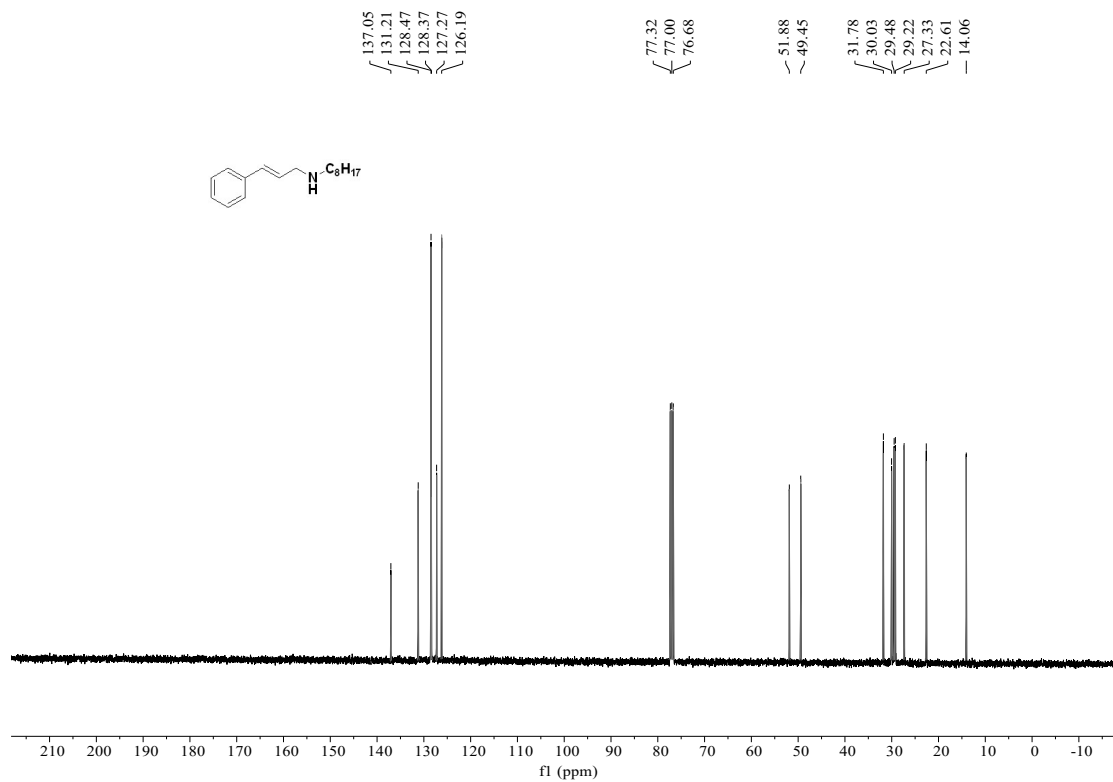

$^{13}\text{C}$  NMR Spectrum of **5am** in  $\text{CDCl}_3$  at 100 MHz

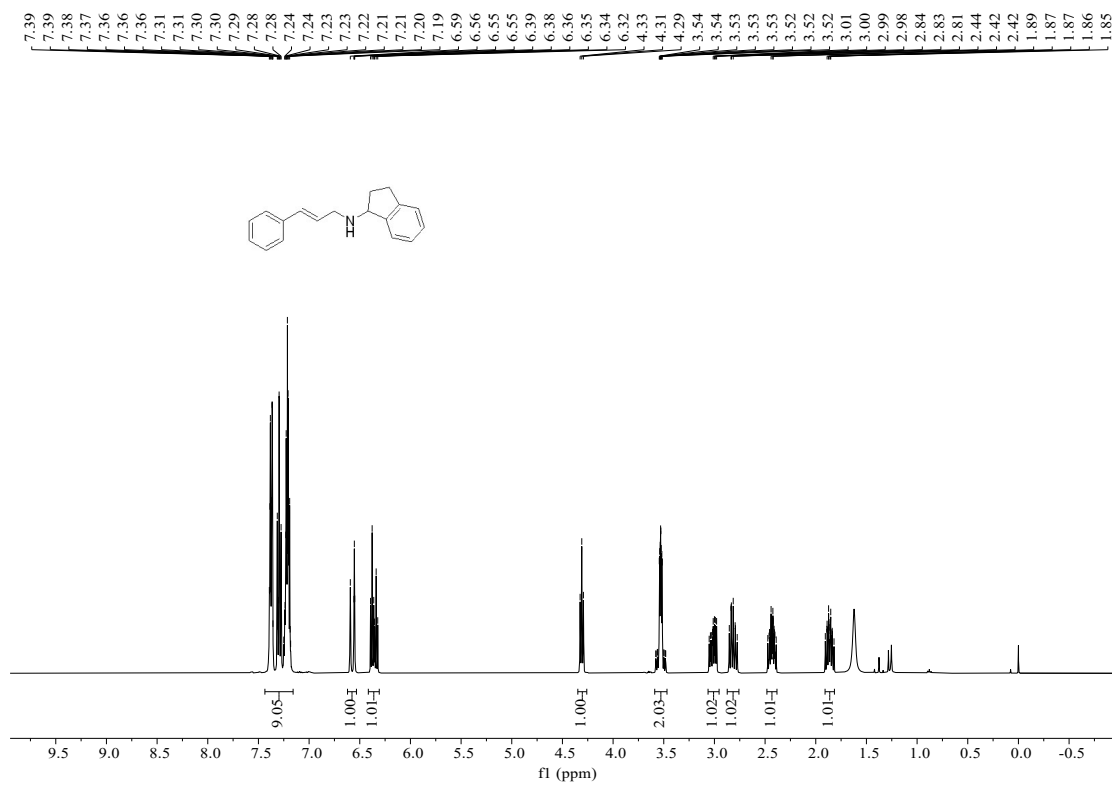

$^1\text{H}$  NMR Spectrum of **5an** in  $\text{CDCl}_3$  at 400 MHz

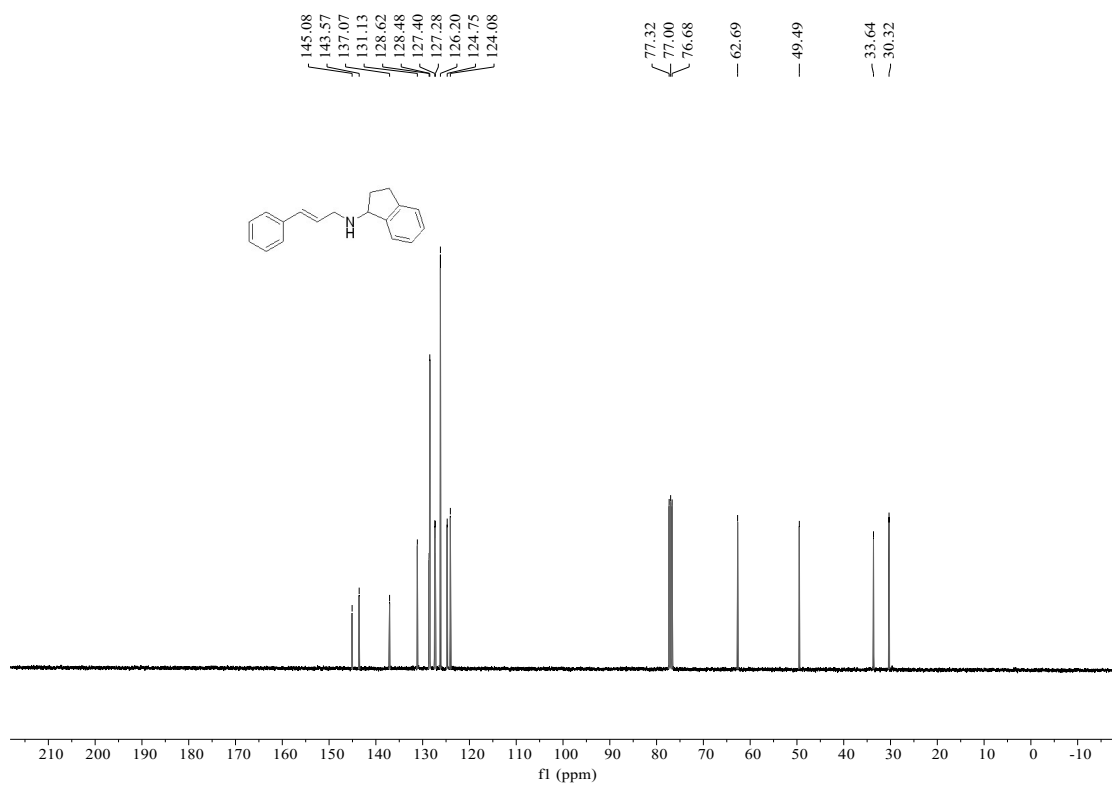

$^{13}\text{C}$  NMR Spectrum of **5an** in  $\text{CDCl}_3$  at 100 MHz

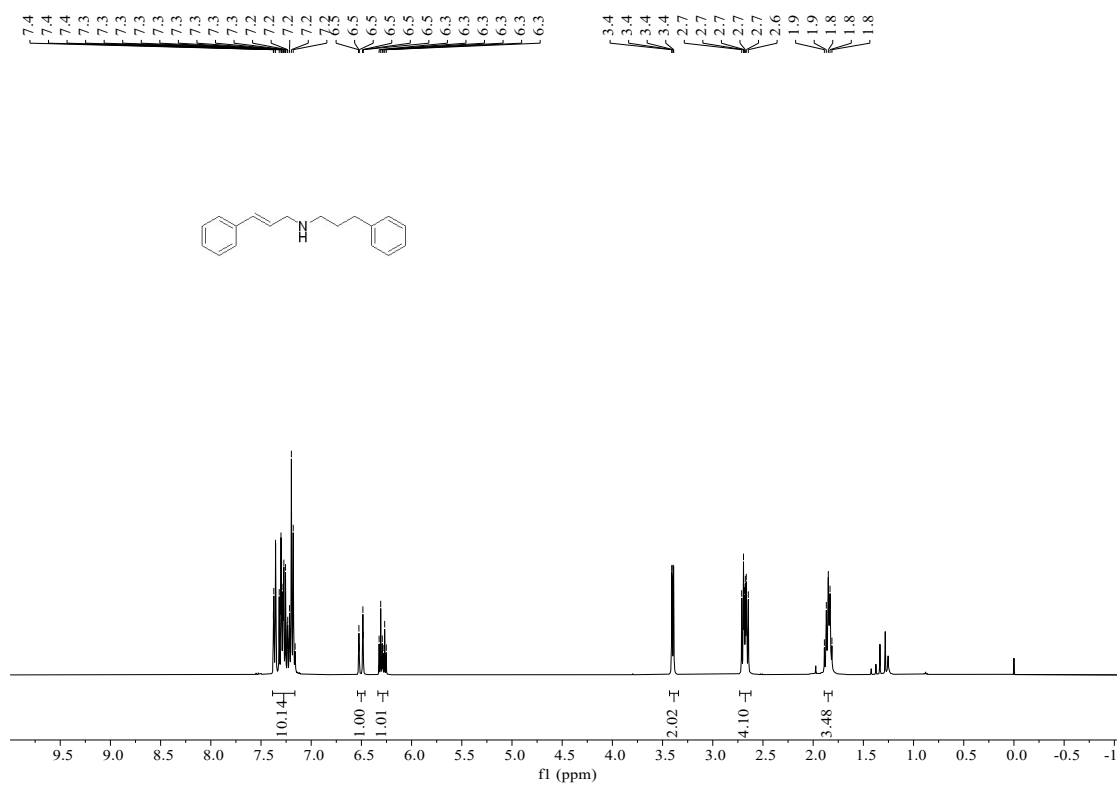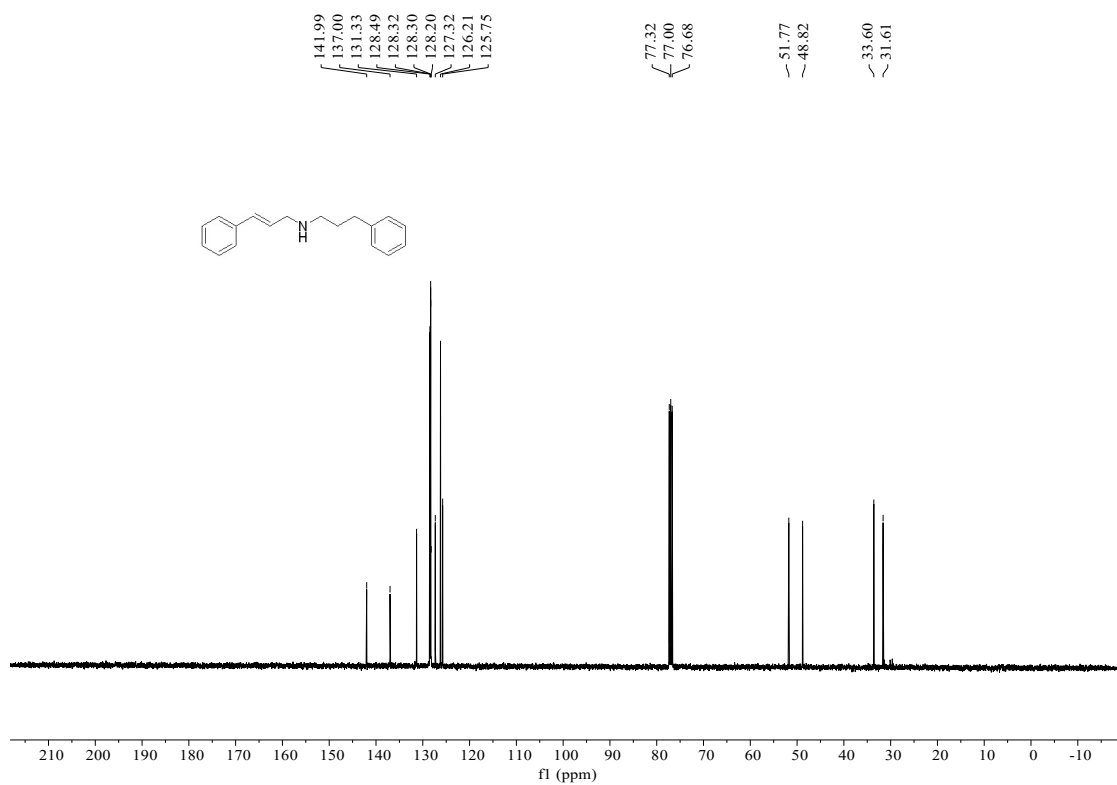

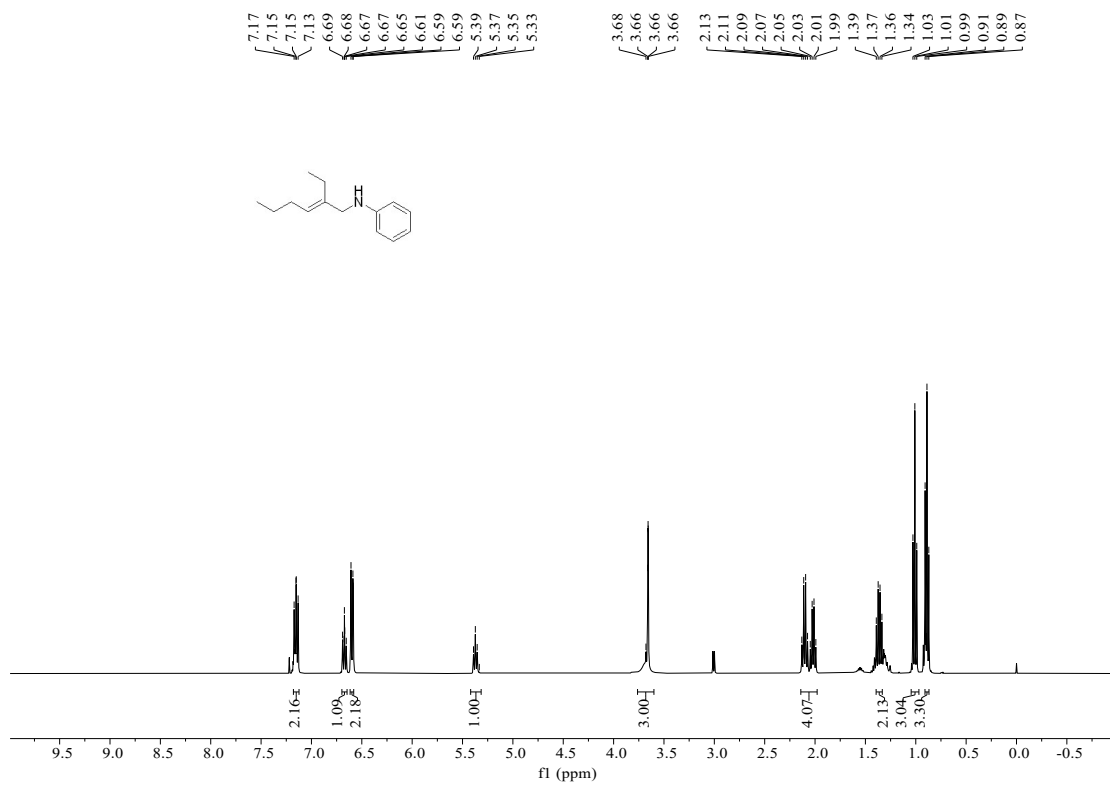

$^1\text{H}$  NMR Spectrum of **5pa** in  $\text{CDCl}_3$  at 400 MHz

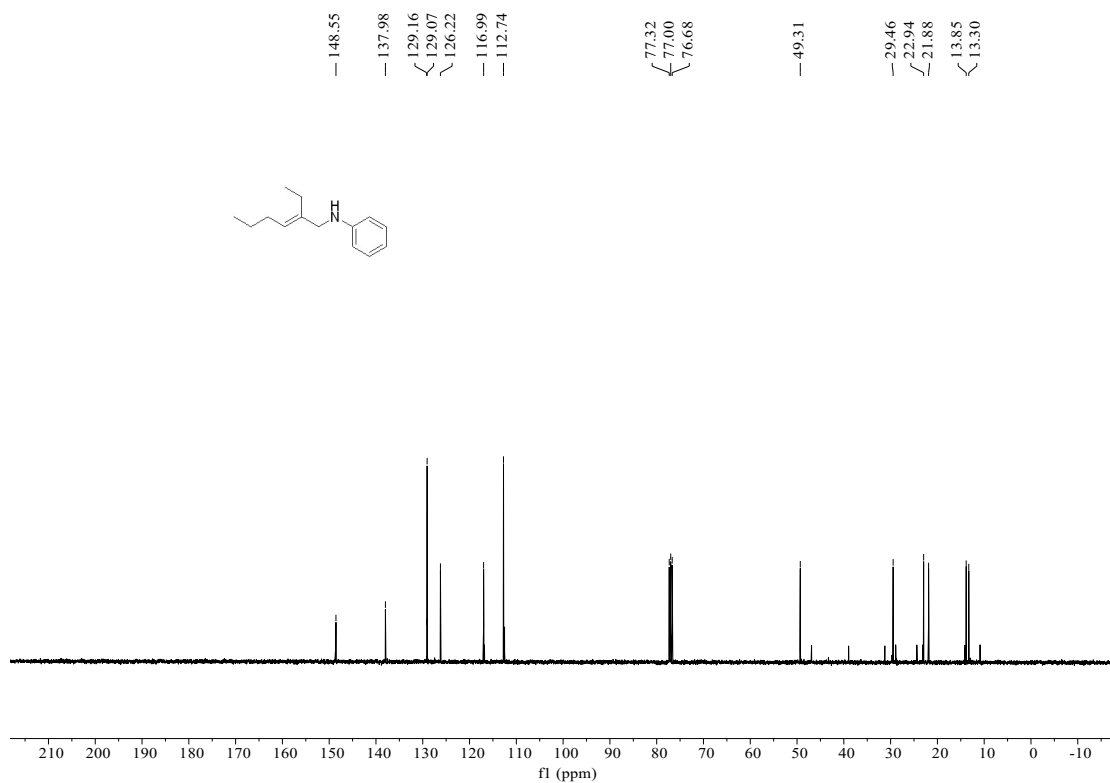

$^{13}\text{C}$  NMR Spectrum of **5pa** in  $\text{CDCl}_3$  at 100 MHz



## F. HPLC spectra

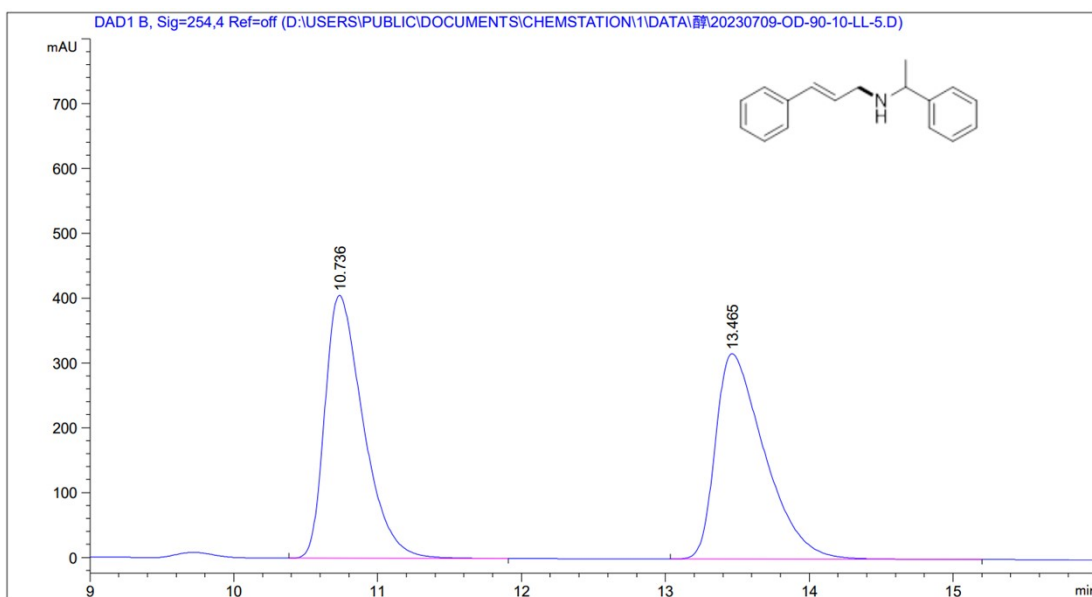

| Peak # | RetTime [min] | Type | Width [min] | Area [mAu*s] | Height [mAu] | Arer %  |
|--------|---------------|------|-------------|--------------|--------------|---------|
| 1      | 10.736        | BB   | 0.2819      | 7507.10986   | 405.62988    | 50.0104 |
| 2      | 13.465        | BB   | 0.3587      | 7503.97949   | 316.43756    | 49.9896 |

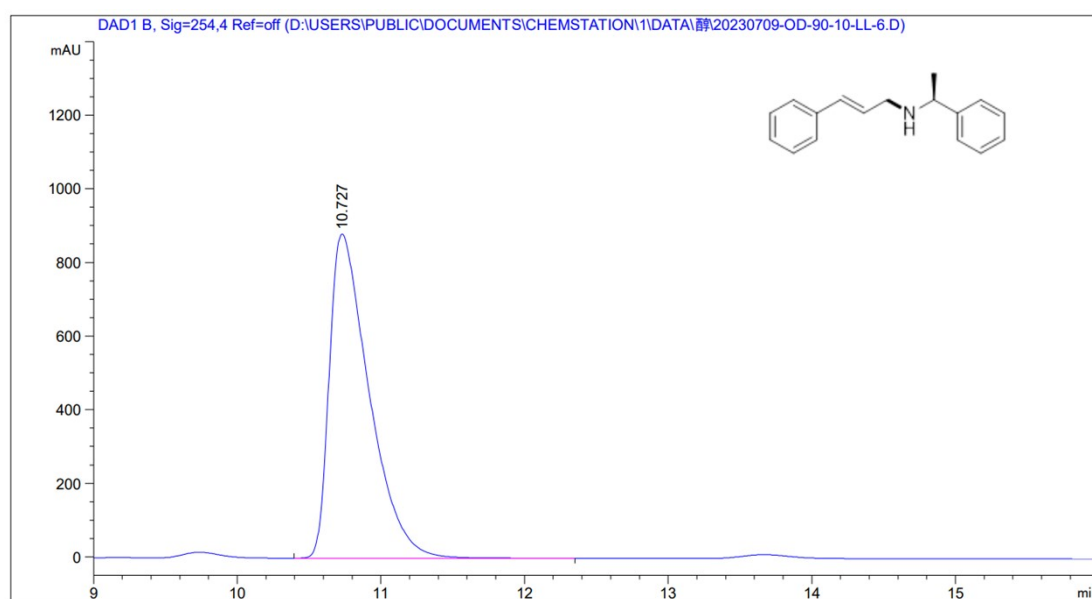

| Peak # | RetTime [min] | Type | Width [min] | Area [mAu*s] | Height [mAu] | Arer %   |
|--------|---------------|------|-------------|--------------|--------------|----------|
| 1      | 10.727        | BB   | 0.2881      | 1.6924e4     | 880.89807    | 100.0000 |

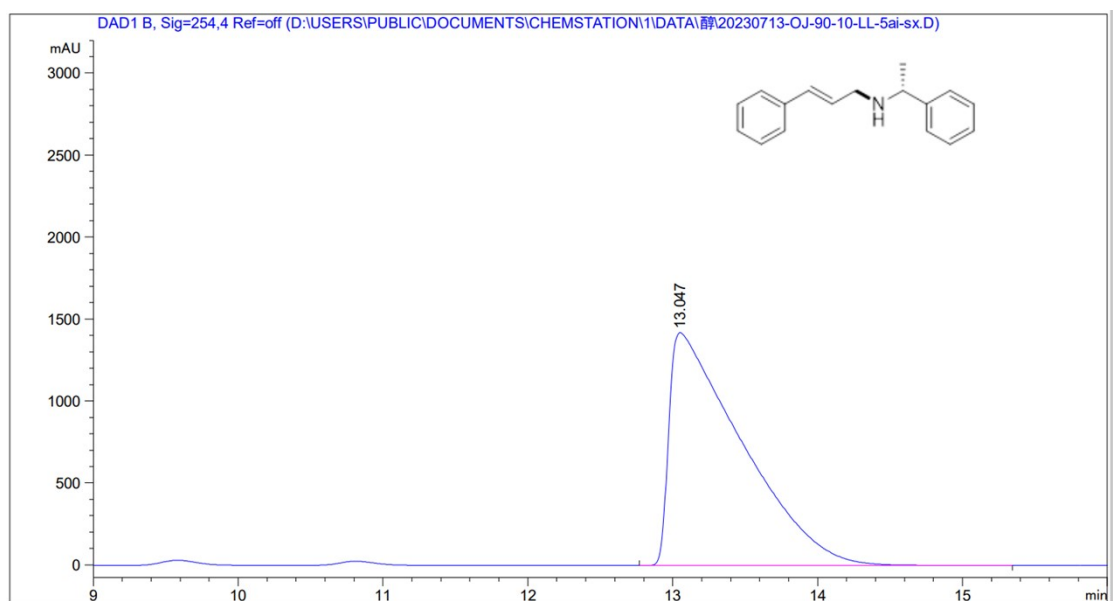

| Peak # | RetTime [min] | Type | Width [min] | Area [mAu*s] | Height [mAu] | Arer %   |
|--------|---------------|------|-------------|--------------|--------------|----------|
| 1      | 13.047        | BB   | 0.4708      | 4.95305e4    | 1420.49255   | 100.0000 |

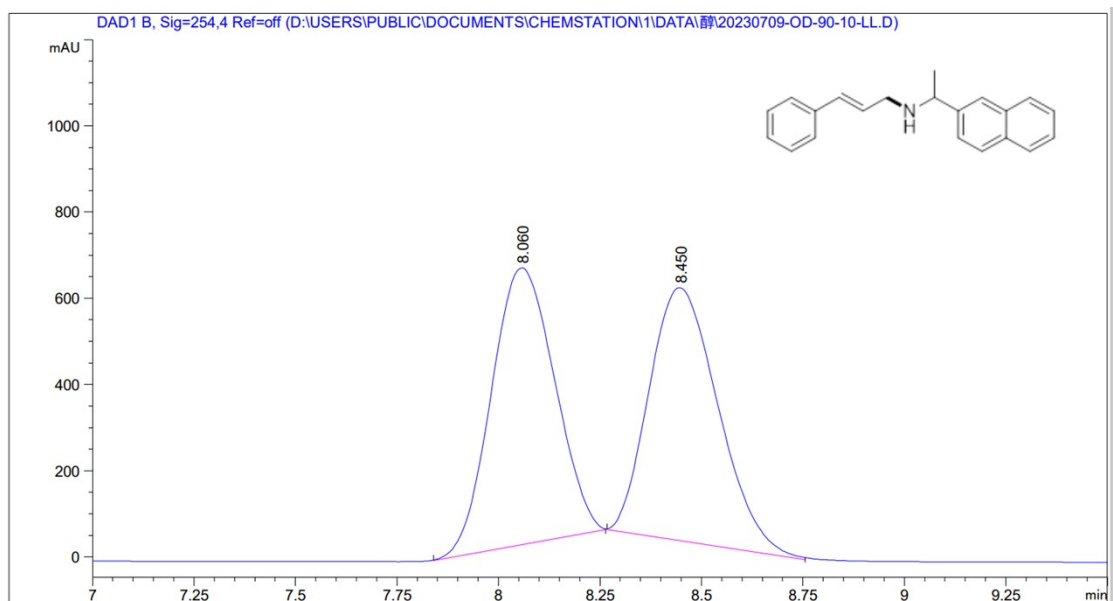

| Peak # | RetTime [min] | Type | Width [min] | Area [mAu*s] | Height [mAu] | Arer %  |
|--------|---------------|------|-------------|--------------|--------------|---------|
| 1      | 8.060         | MM R | 0.1797      | 6931.49561   | 642.76056    | 49.9672 |
| 2      | 8.450         | MM R | 0.1971      | 6940.59229   | 587.04022    | 50.0328 |

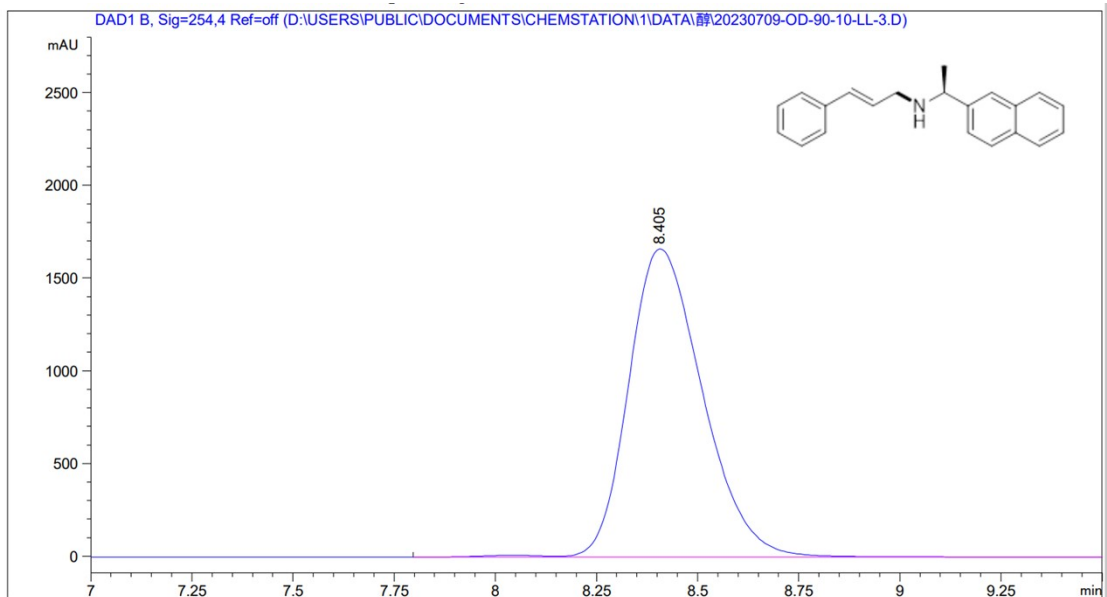

| Peak # | RetTime [min] | Type | Width [min] | Area [mAu*s] | Height [mAu] | Arer %   |
|--------|---------------|------|-------------|--------------|--------------|----------|
| 1      | 8.405         | VB R | 0.1985      | 2.12833e4    | 1663.42688   | 100.0000 |

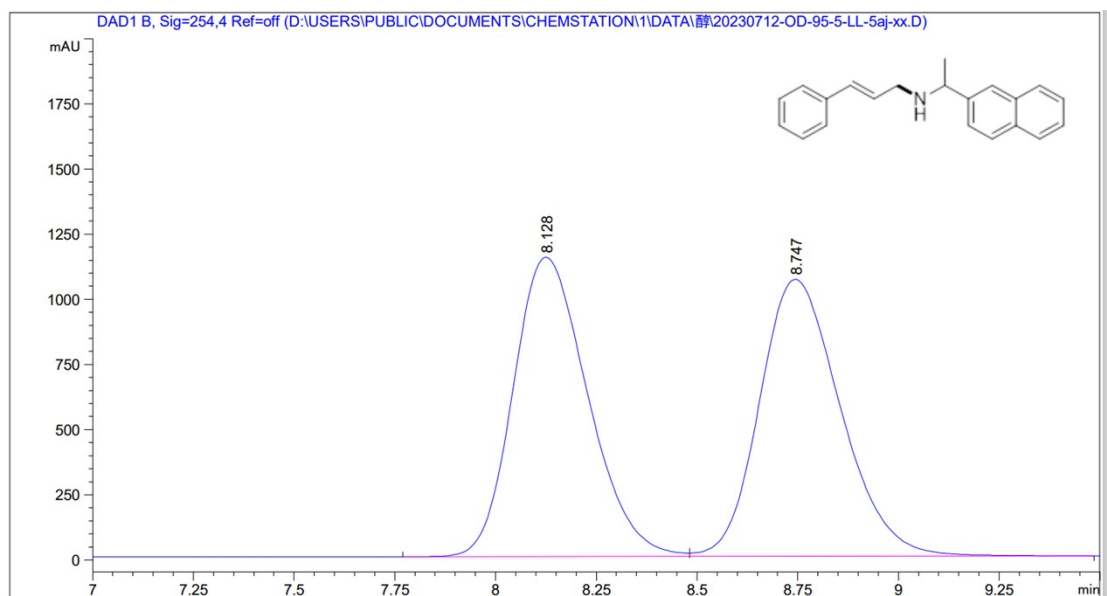

| Peak # | RetTime [min] | Type | Width [min] | Area [mAu*s] | Height [mAu] | Arer %  |
|--------|---------------|------|-------------|--------------|--------------|---------|
| 1      | 8.128         | BV   | 0.2000      | 1.47689e4    | 1148.91370   | 49.8949 |
| 2      | 8.747         | VB   | 0.2169      | 1.48312e4    | 1062.42920   | 50.1051 |

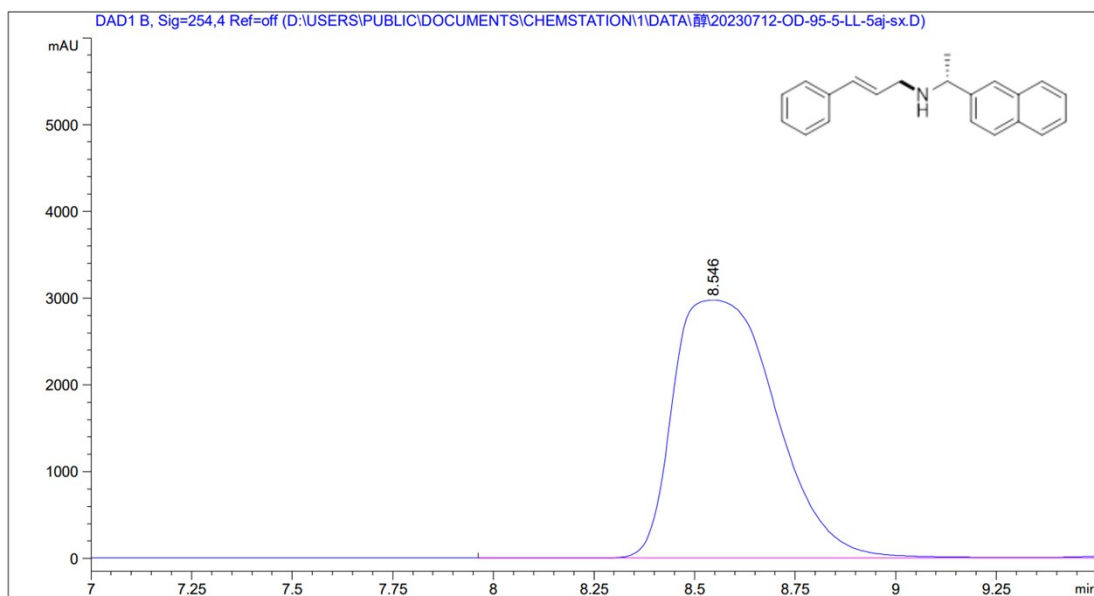

| Peak # | RetTime [min] | Type | Width [min] | Area [mAu*s] | Height [mAu] | Arer %   |
|--------|---------------|------|-------------|--------------|--------------|----------|
| 1      | 8.546         | BV R | 0.2799      | 5.31265e4    | 2974.11206   | 100.0000 |

## G. HRMS Spectra

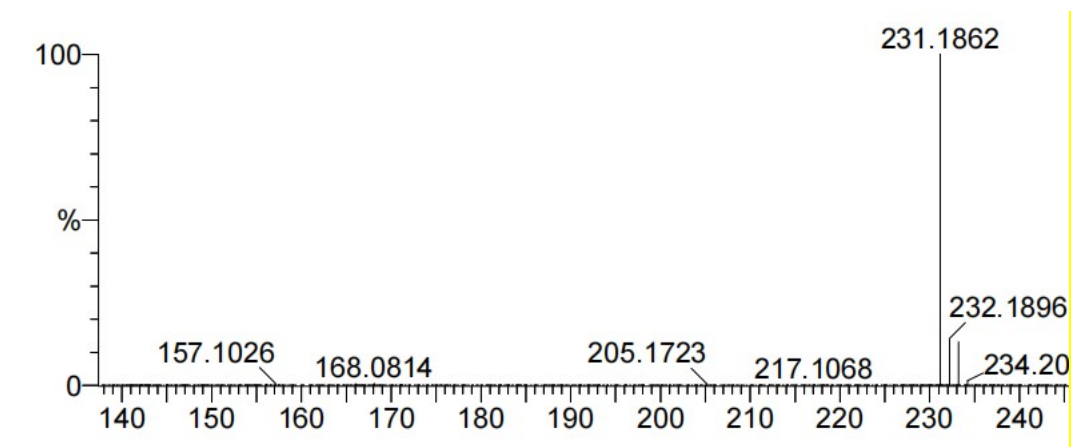

HRMS Spectrum of 3ba

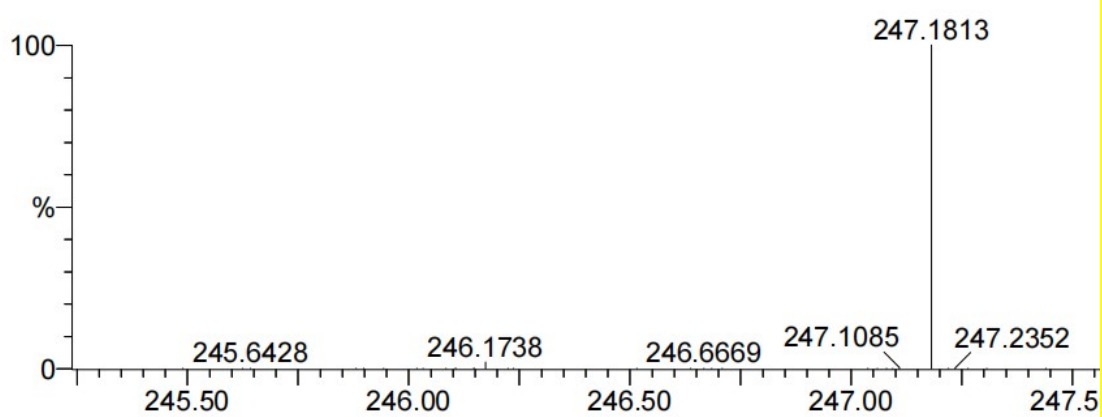

HRMS Spectrum of 3ca

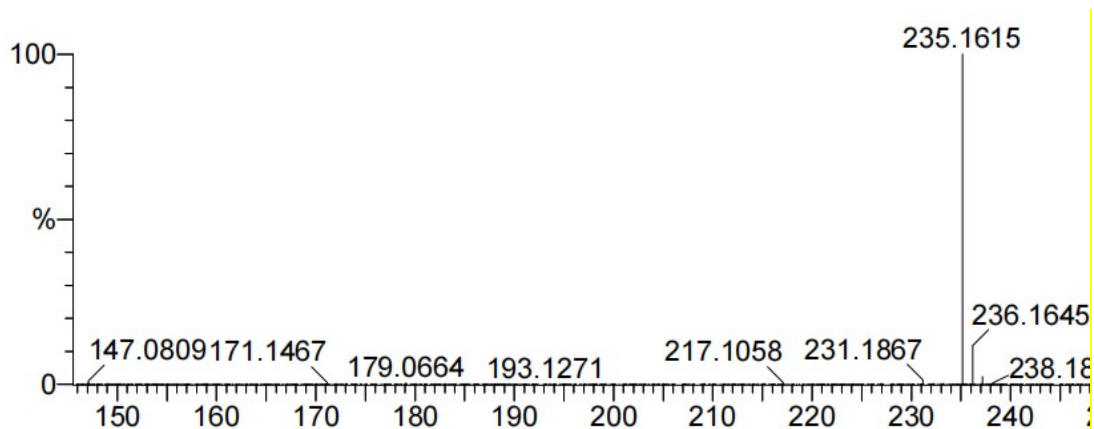

HRMS Spectrum of 3da

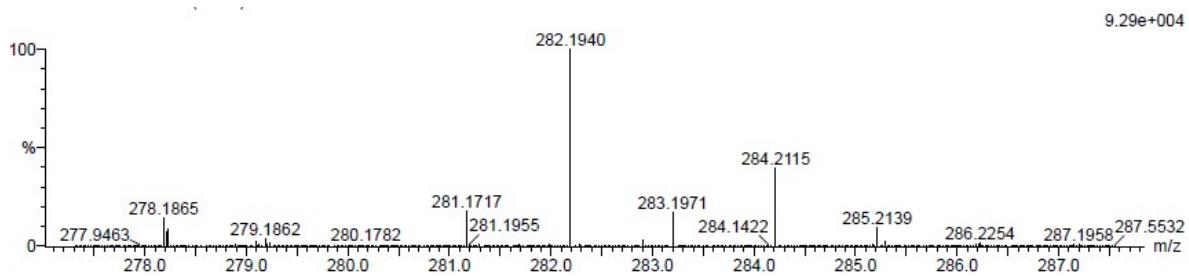

**HRMS Spectrum of 3ea**

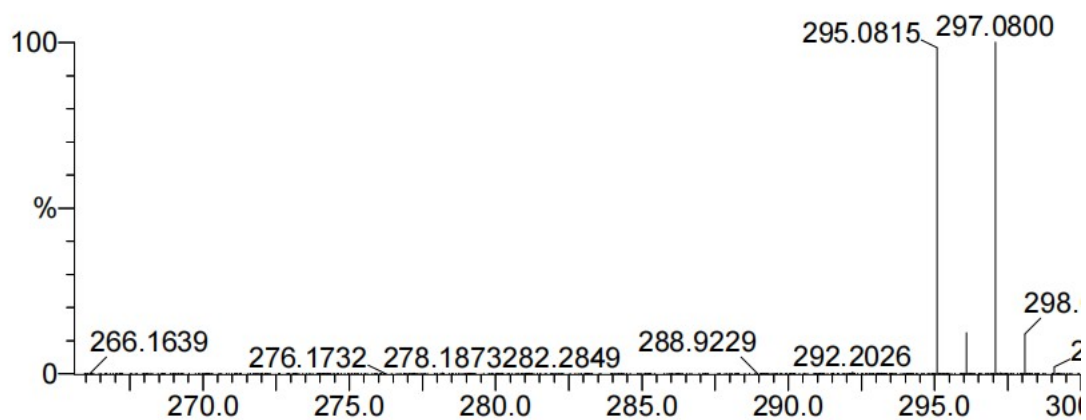

**HRMS Spectrum of 3fa**

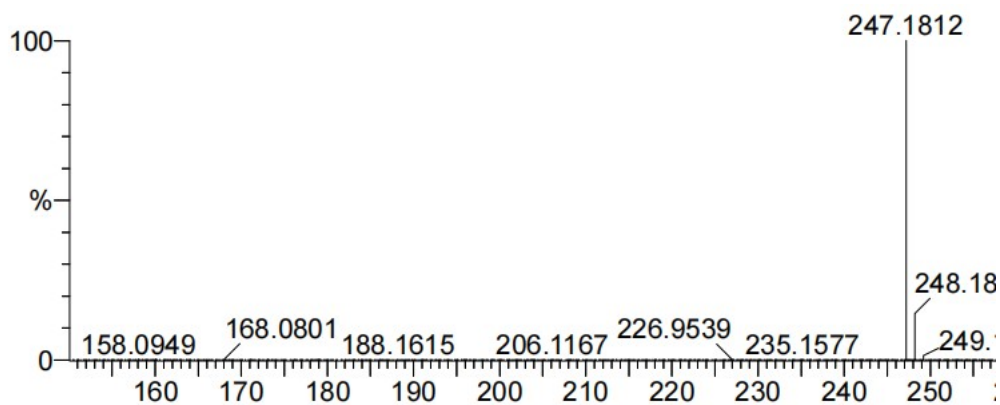

**HRMS Spectrum of 3ga**

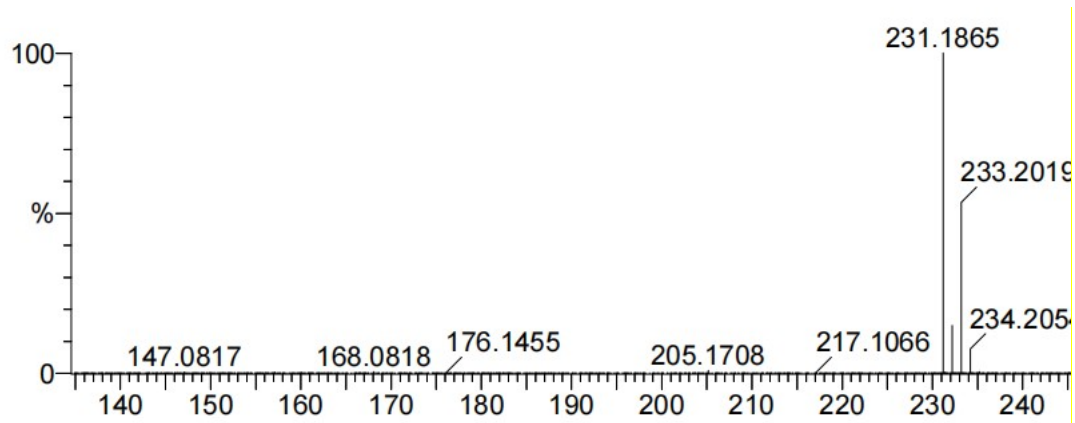

**HRMS Spectrum of 3ha**

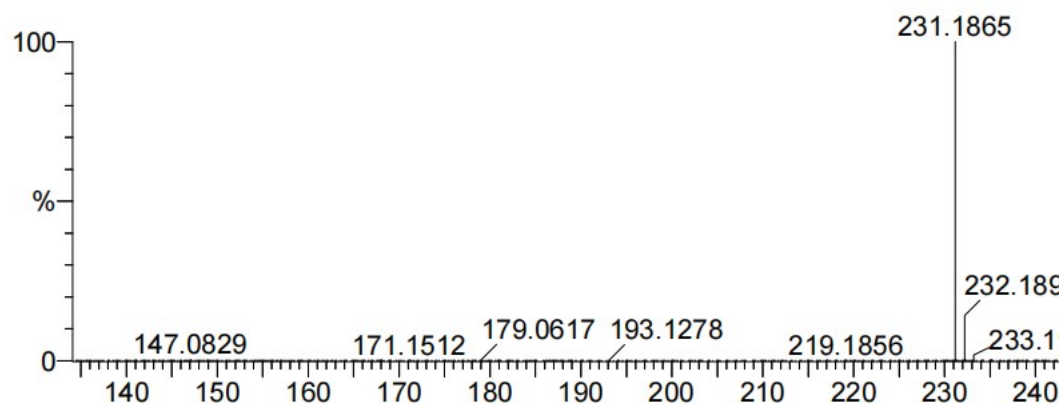

**HRMS Spectrum of 3ia**

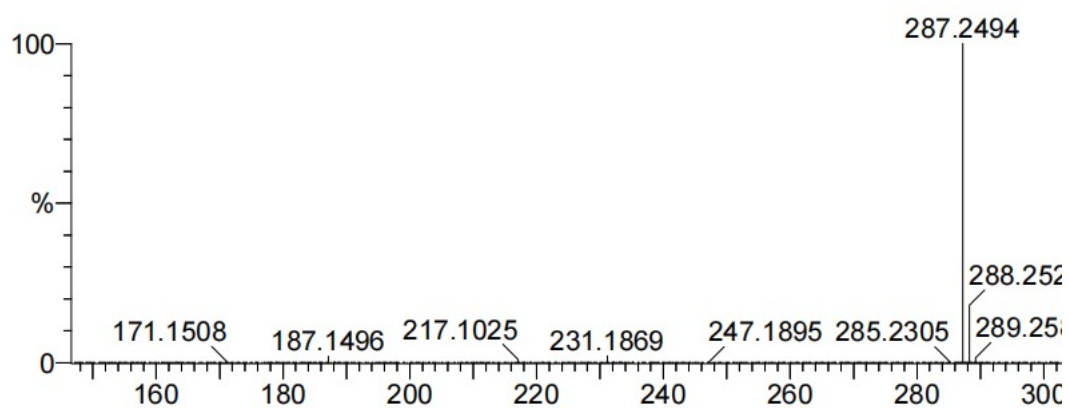

**HRMS Spectrum of 3ja**

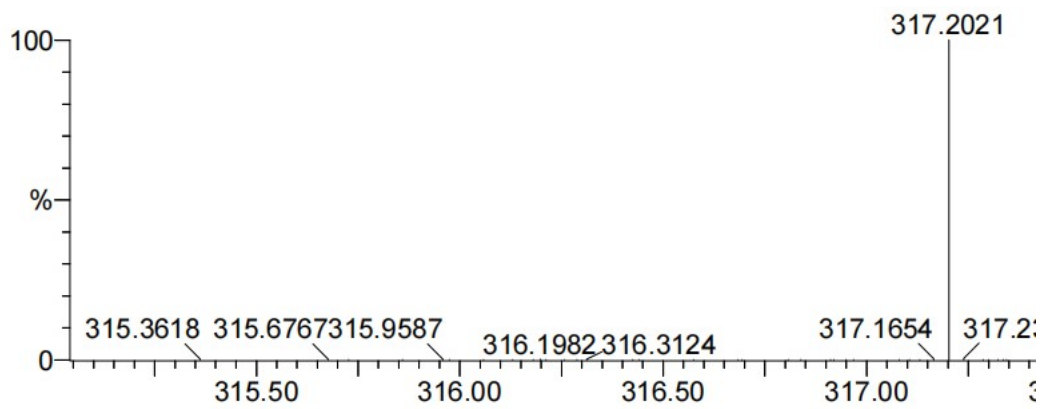

**HRMS Spectrum of 3ka**

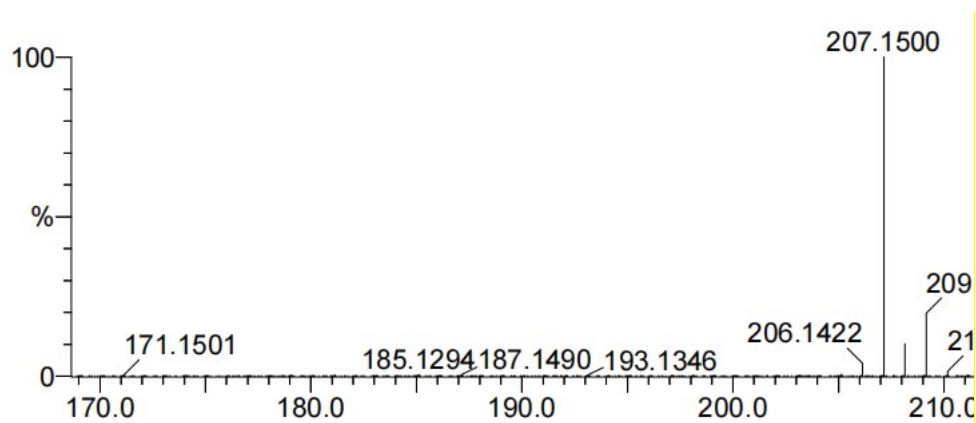

**HRMS Spectrum of 3la**

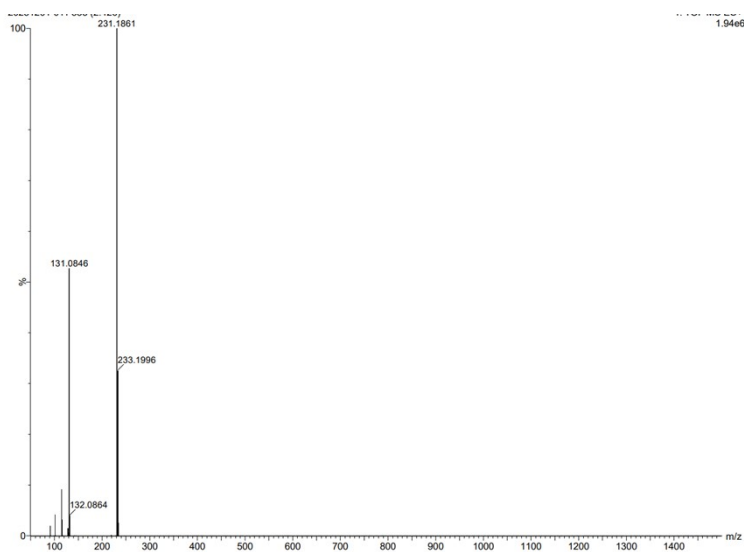

**HRMS Spectrum of 3ma**



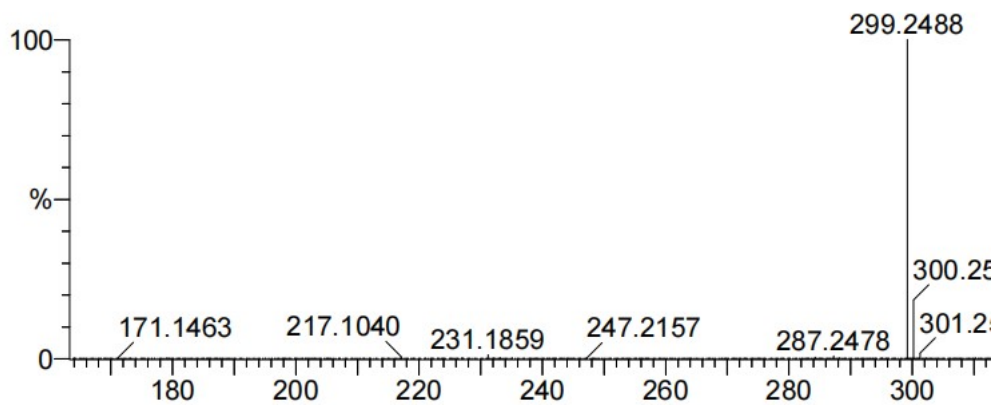

**HRMS Spectrum of 3nb**

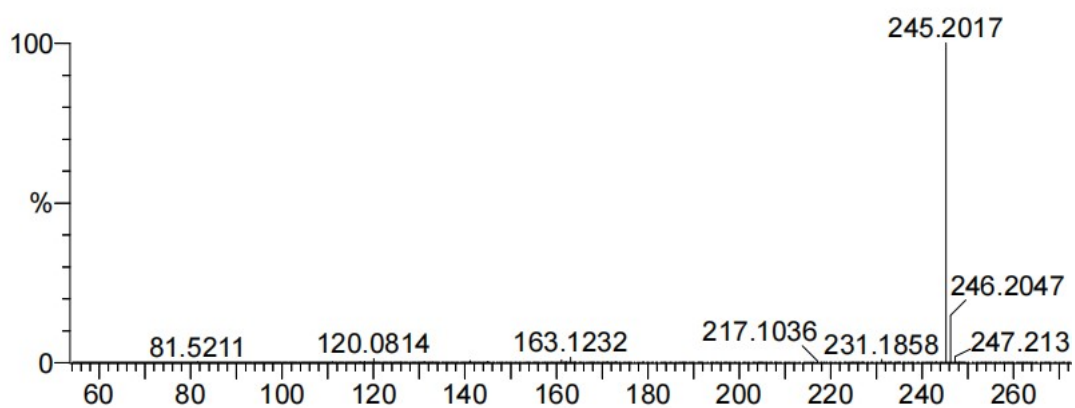

**HRMS Spectrum of 3ob**

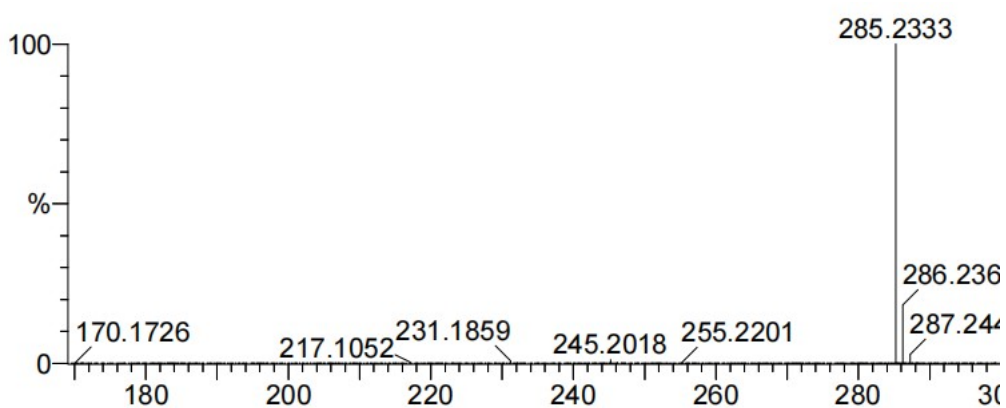

**HRMS Spectrum of 3ad**

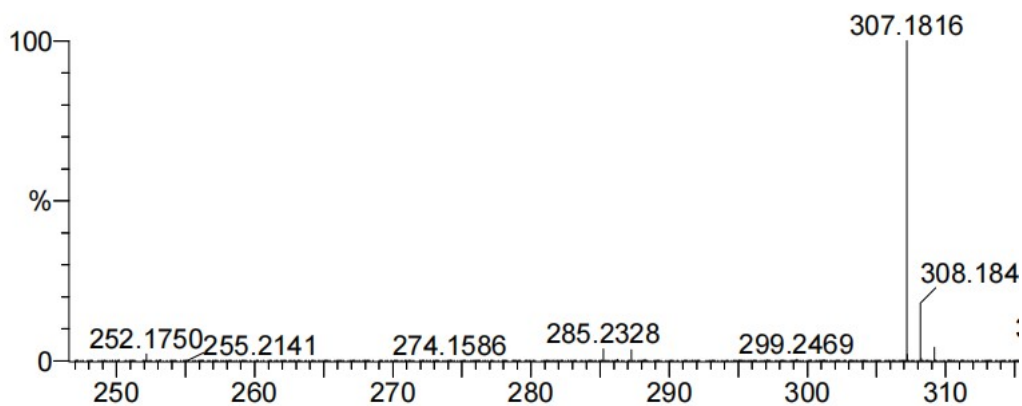

**HRMS Spectrum of 3ae**

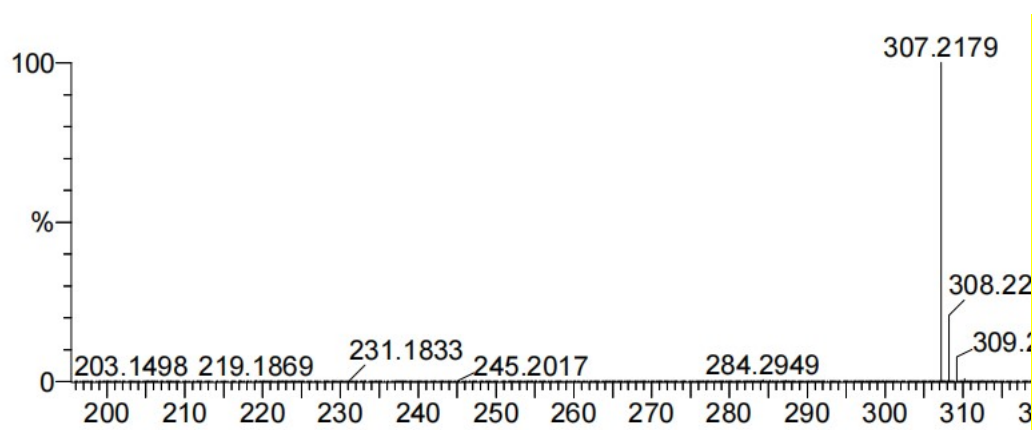

**HRMS Spectrum of 3af**

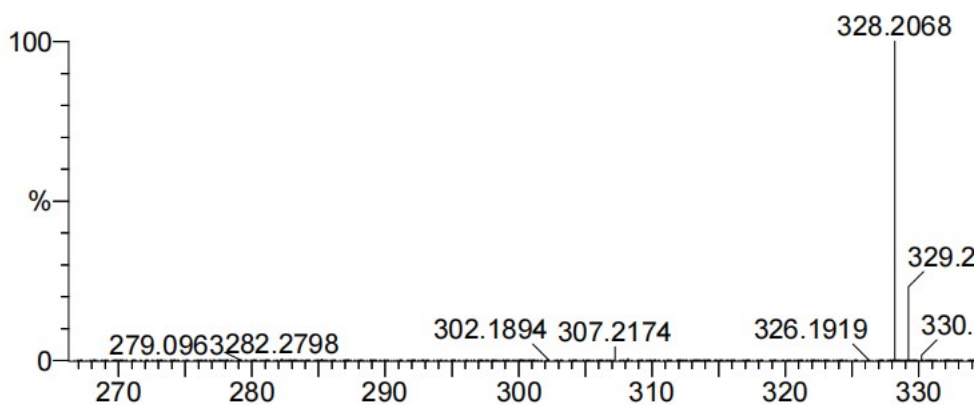

**HRMS Spectrum of 5al**

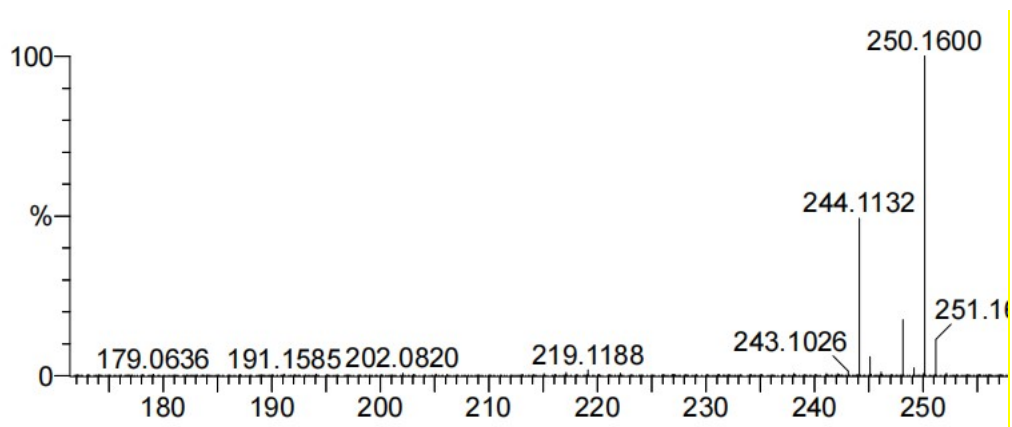

**HRMS Spectrum of 5an**

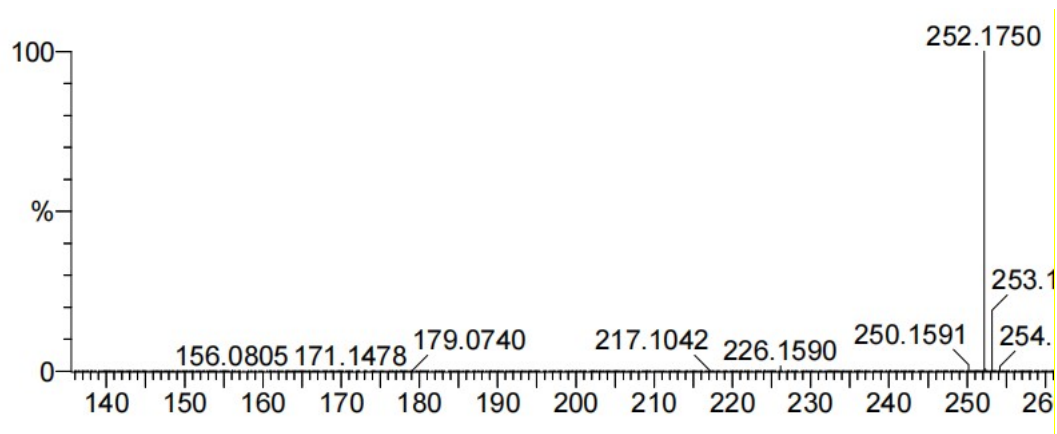

**HRMS Spectrum of 5ao**

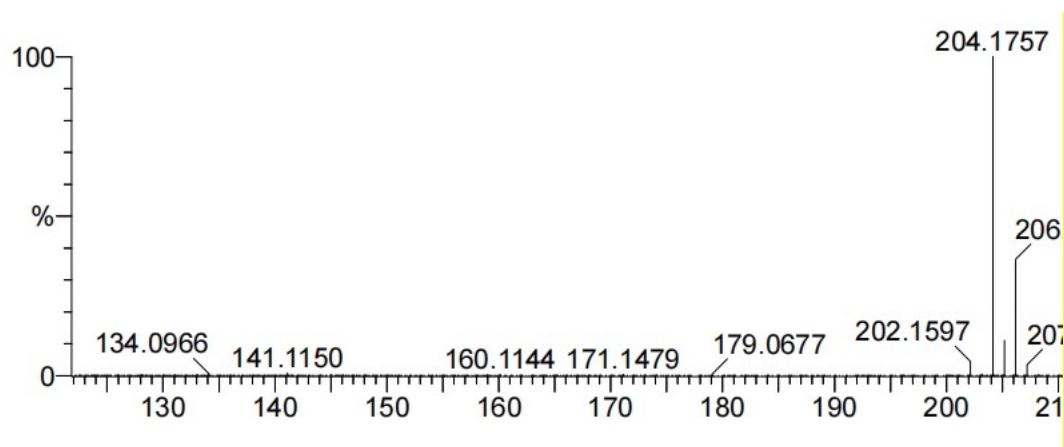

**HRMS Spectrum of 5pa**

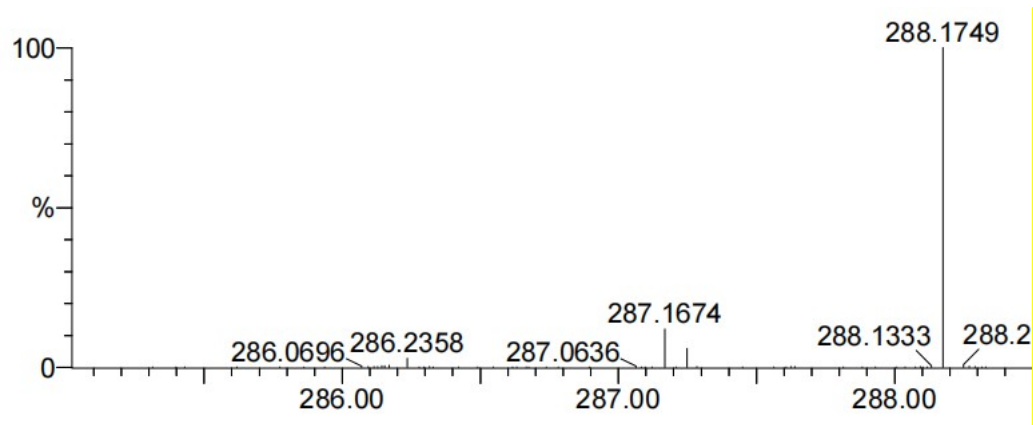

**HRMS Spectrum of 5aj**
